# Supplementary material for: Medicinal Plants for Rich People vs. Medicinal Plants for Poor People: A Case Study from the Peruvian Andes
Source: MDPI journal article supplement (doi:10.3390/plants10081634), 2021-08-09
Supplement: s1 [file s1]

**Table S1.** Medicinal plants used in the city of Chachapoyas, in the tropical montane forests of northern (Peru).

| Scientific Name (voucher)               | Vernacular Name      | Status           | Category                                    | Subcategory                       | Plant Part       | Preparation                                 | Mode of Administration | Informants     |
|-----------------------------------------|----------------------|------------------|---------------------------------------------|-----------------------------------|------------------|---------------------------------------------|------------------------|----------------|
| Adoxaceae                               |                      |                  |                                             |                                   |                  |                                             |                        |                |
| Sambucus peruviana Kunth (FC682)        | Saúco                | Cultivated, wild | Cultural diseases and disorders             | Susto, espanto                    | Lf               | Dc                                          | Or                     | 1              |
|                                         |                      |                  |                                             | Tijte                             | Bd, Lf           | Fs, Ml                                      | Bt, Kn                 | 4              |
|                                         |                      |                  | Digestive system                            | Diarrhoea                         | Lf, Sd           | If                                          | Or                     | 2              |
|                                         |                      |                  |                                             | Laxative                          | Bd, Lf, St       | If                                          | Or                     | 5              |
|                                         |                      |                  | General ailments with unspecific symptoms   | Fever                             | Lf               | Fs                                          | Kn                     | 2              |
|                                         |                      |                  |                                             | General malaise                   | Lf               | Wm                                          | Pl                     | 1              |
|                                         |                      |                  | Reproductive system and reproductive health | Menopause                         | Fr               | Fs                                          | Or                     | 1              |
|                                         |                      |                  |                                             | Skin and subcutaneous tissue      | Acne             | Lf                                          | Wm                     | Pl             |
|                                         |                      |                  | Itil                                        |                                   | Lf               | Fs                                          | Kn                     | 1              |
|                                         |                      |                  | Urinary system                              | Prostate disorders                | Lf               | If                                          | Or                     | 1              |
| Metabolic system and nutrition          | Weight loss          | Lf               | If                                          | Or                                | 1                |                                             |                        |                |
| Amaranthaceae                           |                      |                  |                                             |                                   |                  |                                             |                        |                |
| Alternanthera mexicana Moq. (FC684)     | Lancetilla de huerta | Cultivated       | Blood and cardio-vascular system            | Hemorrhoids                       | Lf               | Dc                                          | Bt                     | 1              |
|                                         |                      |                  |                                             | Diarrhoea                         | Lf               | Ml                                          | Or                     | 1              |
|                                         |                      |                  | Digestive system                            | Fever                             | Ep, Lf           | If                                          | Bt, Or                 | 13             |
|                                         |                      |                  |                                             | Headache                          | Lf               | If                                          | Bt                     | 1              |
|                                         |                      |                  | Infections and infestations                 | Chickenpox                        | Ep, Lf           | If                                          | Bt, Or                 | 8              |
|                                         |                      |                  |                                             | Insect bite                       | Lf               | Dc                                          | Bt                     | 1              |
|                                         |                      |                  | Dental health                               | Toothache                         | Lf               | Dc                                          | Gg                     | 1              |
|                                         |                      |                  |                                             | Sensory system                    | Visual disorders | Lf                                          | Dc                     | Bt             |
|                                         |                      |                  | Skin and subcutaneous tissue                | Wounds, healing                   | Lf               | Dc, Fs, If, Ml                              | Bt, Kn, Or, Pl         | 14             |
|                                         |                      |                  |                                             | Burns                             | Lf               | Dc                                          | Bt                     | 2              |
|                                         |                      |                  | Kidney disorders, emollient, diuretic       | Fr, Lf                            | Dc, If, Ml       | Or, Pl                                      | 10                     |                |
|                                         |                      |                  |                                             |                                   |                  |                                             |                        | Urinary system |
|                                         |                      |                  | Prostate disorders                          | Lf                                | Dc, If           | Or                                          | 2                      |                |
|                                         |                      |                  | Amaranthus caudatus L.                      | Kiwicha                           | Cultivated       | Reproductive system and reproductive health | Menopause              | Sd             |
| Beta vulgaris L. var. rapa Dum. (FC683) | Betarraga            | Cultivated       | Blood and cardio-vascular system            | Anemia                            | Fr               | Dc, Ffs, Ml                                 | Or                     | 37             |
|                                         |                      |                  | Reproductive system and reproductive health | Menopause                         | Fr               | Ml                                          | Or                     | 1              |
| Chenopodium ambrosioides L. (FC685)     | Paico                | Cultivated, wild | General ailments with unspecific symptoms   | Headache                          | Lf               | Dc                                          | Bt                     | 1              |
|                                         |                      |                  |                                             | Stomach cramps                    | Ep, Lf           | If                                          | Or                     | 2              |
|                                         |                      |                  | Digestive system                            | Diarrhoea                         | Lf               | If                                          | Or                     | 1              |
|                                         |                      |                  |                                             | Laxative                          | Lf               | If, Ml                                      | Or                     | 3              |
|                                         |                      |                  |                                             | Intestinal parasites              | Lf               | Dc, Fs, If, Ml                              | Bt, Or                 | 90             |
| Chenopodium murale L. (FC688)           | Shucapaico           | Wild             | Pregnancy, birth and puerperium             | Breastfeeding                     | Lf               | Dc                                          | Or                     | 1              |
|                                         |                      |                  | Digestive system                            | Diarrhoea                         | Lf               | If                                          | Or                     | 1              |
| Chenopodium quinoa Willd. (FC687)       | Quinoa               | Cultivated       | Reproductive system and reproductive health | Fertility                         | Sd               | Jc                                          | Or                     | 1              |
| Iresine herbstii Hook (FC686)           | Pashquete            | Cultivated, wild | Cultural diseases and disorders             | Antimonia, gentil, viejo, antiguo | Lf               | Fs                                          | Bt                     | 1              |
|                                         |                      |                  |                                             | Aire, malaire                     | Lf               | If                                          | Or                     | 1              |

|                                                     |                |                  |                                             |                                   |           |            |                |            |
|-----------------------------------------------------|----------------|------------------|---------------------------------------------|-----------------------------------|-----------|------------|----------------|------------|
| Spinacia oleracea L. (FC682)                        | Espinaca       | Cultivated       | General ailments with unspecific symptoms   | Fever                             | Lf        | Dc, Fs, If | Bt             | 4          |
|                                                     |                |                  | Infections and infestations                 | Chickenpox                        | Lf        | Dc, If     | Bt, Or         | 4          |
|                                                     |                |                  | Pregnancy, birth and puerperium             | Postpartum                        | Lf        | Dc, Fs, If | Bt, Or         | 11         |
|                                                     |                |                  | Skin and subcutaneous tissue                | Wounds, healing                   | Lf        | Dc         | Bt             | 1          |
|                                                     |                |                  | Blood and cardio-vascular system            | Anemia                            | Lf        | Dc, Fs, MI | Or             | 9          |
| Amaryllidaceae                                      |                |                  |                                             |                                   |           |            |                |            |
| Allium cepa L. (FC690)                              | Cebolla blanca | Cultivated       | Blood and cardio-vascular system            | Anemia                            | Ro        | MI         | Or             | 1          |
|                                                     |                |                  | Reproductive system and reproductive health | Aphrodisiac                       | Ro        | Dc         | Or             | 1          |
|                                                     |                |                  | Other uses                                  | Hair loss                         | Ro        | If, MI     | Bt, Pl         | 2          |
|                                                     |                |                  | Sensory system                              | Hearing disorders                 | Ro        | MI         | Bt             | 1          |
|                                                     |                |                  | Skin and subcutaneous tissue                | Burns                             | Ro        | Fs, If     | Bt, Or, Pl     | 9          |
| Allium fistulosum L. (FC691)                        | Cebolla china  | Cultivated       | Respiratory system                          | Flu                               | Ro        | If         | Or             | 1          |
|                                                     |                |                  | Infections and infestations                 | Chickenpest                       | Ro        | MI         | Or             | 1          |
|                                                     |                |                  |                                             | Insect bite                       | Ro        | MI         | Or             | 1          |
|                                                     |                |                  |                                             | Fleas                             | Ro        | MI, Wm     | Kn, Pl         | 2          |
|                                                     |                |                  | Blood and cardio-vascular system            | Anemia                            | Ro        | Fs         | Or             | 1          |
| Allium sativum L. (FC689)                           | Ajo            | Cultivated       | Blood and cardio-vascular system            | High pressure                     | Ro        | Dc, Fs     | Or             | 2          |
|                                                     |                |                  |                                             | Antimonia, gentil, viejo, antiguo | Ro        | If         | Bt             | 1          |
|                                                     |                |                  | Cultural diseases and disorders             | Tijte                             | Ro        | MI         | Kn             | 1          |
|                                                     |                |                  |                                             | Susto, espanto                    | Lf        | Dc         | Bt             | 1          |
|                                                     |                |                  |                                             | Dental health                     | Toothache | Ro         | Dc, Fs, MI     | Bt, Kn, Or |
| Allium sativum L. (FC689)                           | Ajo            | Cultivated       | Digestive system                            | Diarrhoea                         | Ro        | Fs         | Or             | 1          |
|                                                     |                |                  | General ailments with unspecific symptoms   | Fever                             | Ro        | MI         | Bt             | 1          |
|                                                     |                |                  |                                             | Insect bite                       | Ro        | MI         | Kn             | 1          |
|                                                     |                |                  |                                             | Fleas                             | Ro        | Wm         | Kn             | 1          |
|                                                     |                |                  | Infections and infestations                 | UTA, leishmaniasis                | Ro        | MI         | Kn             | 1          |
| Allium sativum L. (FC689)                           | Ajo            | Cultivated       |                                             | Chickenpest                       | Ro        | MI         | Or             | 1          |
|                                                     |                |                  |                                             | Chickenpox                        | Ro        | If         | Kn             | 1          |
|                                                     |                |                  |                                             | Acne                              | Ro        | Fs, If     | Bt, Pl         | 2          |
|                                                     |                |                  | Skin and subcutaneous tissue                | Wounds, healing                   | Ro        | MI         | Kn             | 1          |
|                                                     |                |                  |                                             | Burns                             | Ro        | Dc         | Bt             | 1          |
| Anacardiaceae                                       |                |                  |                                             |                                   |           |            |                |            |
| Mangifera indica L. (FC694)                         | Mango          | Cultivated       |                                             | Feet fungus                       | Ro        | Dc         | Bt             | 1          |
|                                                     |                |                  | Digestive system                            | Diarrhoea                         | Bk, Fr    | If         | Or             | 2          |
|                                                     |                |                  |                                             | Indigestive                       | Fr        | Fs         | Or             | 1          |
| Mauria heterophylla Kunth                           | Shimir         | Cultivated       | Other uses                                  | Cancer                            | Fr        | Fs         | Or             | 1          |
|                                                     |                |                  | Endocrine system                            | Diabetes                          | Lf        | If         | Or             | 2          |
|                                                     |                |                  | Cultural diseases and disorders             | Susto, espanto                    | Lf        | Dc         | Or             | 1          |
| Schinus molle L. (FC695)                            | Molle          | Cultivated, wild | Respiratory system                          | Flu                               | Lf        | If         | Or             | 1          |
|                                                     |                |                  | Muscular-skeletal system                    | Rheumatism                        | Ap, Lf    | Fm, Fs, MI | Bt, Kn, Or, Pl | 6          |
|                                                     |                |                  |                                             | Joint sprains                     | Lf        | Fm, Wm     | Bt, Kn         | 2          |
| Spondias purpurea L. (FC692)                        | Ciruela        | Cultivated       | Infections and infestations                 | Insect bite                       | Lf        | If         | Bt             | 1          |
|                                                     |                |                  | Digestive system                            | Laxative                          | Fr        | Fs         | Or             | 2          |
|                                                     |                |                  | Other uses                                  | Cancer                            | Bd        | Dc         | Or             | 1          |
| Toxicodendron striatum (Ruiz & Pav.) Kuntze (FC693) | Itil           | Wild             | Cultural diseases and disorders             | Antimonia, gentil, viejo, antiguo | Lf        | If         | Bt             | 1          |
|                                                     |                |                  | Skin and subcutaneous tissue                | Itil                              | Ep, Lf    | Fs         | Wh             | 3          |

| Annonaceae                                   |                                   |            |                                                         |                                       |                    |                                 |                                   |    |
|----------------------------------------------|-----------------------------------|------------|---------------------------------------------------------|---------------------------------------|--------------------|---------------------------------|-----------------------------------|----|
| <i>Annona cherimola</i> Mill. (FC696)        | Chirimolla                        | Cultivated | Cultural diseases and disorders                         | Susto, espanto                        | Lf                 | If                              | Bt                                | 1  |
|                                              |                                   |            | Blood and cardio-vascular system                        | Anemia                                | Fr                 | Fs                              | Or                                | 2  |
|                                              |                                   |            | Other uses                                              | Cancer                                | Lf                 | If                              | Or                                | 1  |
|                                              |                                   |            |                                                         | Hair loss                             | Fr                 | Fs                              | Pl                                | 1  |
|                                              |                                   |            | Infections and infestations                             | Fleas                                 | Sd                 | MI                              | Bt                                | 2  |
|                                              |                                   |            | Muscular-skeletal system                                | Joint sprains                         | Lf                 | If, Wm                          | Bt, Pl                            | 2  |
|                                              |                                   |            | Endocrine system                                        | Diabetes                              | Fr, Lf             | Dc, If                          | Or                                | 2  |
|                                              |                                   |            | Other uses                                              | Cancer                                | Bd, Bk, Ep, Fr, Lf | Dc, If                          | Or                                | 21 |
| <i>Annona muricata</i> L. (FC697)            | Guanábana                         | Cultivated | Reproductive system and reproductive health             | Fertility                             | Lf                 | If                              | Or                                | 1  |
|                                              |                                   |            |                                                         | Prostate disorders                    | Bd, Fr, Lf         | Dc, Fs, If                      | Or                                | 11 |
|                                              |                                   |            | Urinary system                                          | Kidney disorders, emollient, diuretic | Lf                 | If                              | Or                                | 1  |
| Apiaceae                                     |                                   |            |                                                         |                                       |                    |                                 |                                   |    |
| <i>Apium graveolens</i> L. (FC698)           | Apio                              | Cultivated | Cultural diseases and disorders                         | Aire, malaire                         | St                 | If                              | Or                                | 1  |
|                                              |                                   |            |                                                         | Stomach pain                          | Ep                 | If                              | Or                                | 1  |
|                                              |                                   |            |                                                         | Diarrhoea                             | Ep. Lf, St         | Dc, If, MI                      | Or                                | 12 |
|                                              |                                   |            |                                                         | Stomach infection                     | Lf                 | If                              | Or                                | 1  |
|                                              |                                   |            | Digestive system                                        | Laxative                              | Lf, St             | Dc, If                          | Or                                | 4  |
|                                              |                                   |            |                                                         | Stomach cramps                        | Ep. Lf, St         | Dc, If                          | Or                                | 21 |
|                                              |                                   |            |                                                         | Intestinal parasites                  | Lf, St             | If                              | Or                                | 3  |
|                                              |                                   |            | Pregnancy, birth and puerperium                         | Birth                                 | Ep, Lf, St         | Dc, If                          | Or                                | 4  |
|                                              |                                   |            | Metabolic system and nutrition                          | Weight loss                           | Ep. Lf, St         | Ddc, If, MI                     | Or                                | 8  |
|                                              |                                   |            | Muscular-skeletal system                                | Joint sprains                         | Lf                 | If                              | Or                                | 1  |
|                                              |                                   |            | Reproductive system and reproductive health             | Menstruation disorders                | Lf, St             | If                              | Or                                | 3  |
|                                              |                                   |            |                                                         | Menopause                             | Lf                 | Dc                              | Or                                | 1  |
|                                              |                                   |            |                                                         | Kidney disorders, emollient, diuretic | Lf, St             | Fs, If                          | Or                                | 2  |
|                                              |                                   |            | Urinary system                                          | Hearing disorders                     | Ap                 | Dc                              | Ew                                | 1  |
|                                              |                                   |            | <i>Arracacia peruviana</i> (H. Wolff) Constance (FC705) | Zanahoria del gentil                  | Wild               | Cultural diseases and disorders | Antimonia, gentil, viejo, antiguo | Lf |
| Cultural diseases and disorders              | Antimonia, gentil, viejo, antiguo | Ro         |                                                         |                                       |                    | If                              | Bt                                | 1  |
| <i>Arracacia xanthorrhiza</i> Bancr. (FC702) | Arrachacha blanca                 | Cultivated | Pregnancy, birth and puerperium                         | Birth                                 | Fr, Lf             | Dc, If                          | Or                                | 2  |
|                                              |                                   |            |                                                         | Postpartum                            | Fr                 | If                              | Or                                | 1  |
|                                              |                                   |            | Reproductive system and reproductive health             | Fertility                             | Lf                 | If                              | Or                                | 1  |
| <i>Coriandrum sativum</i> L. (FC699)         | Culantro                          | Cultivated | Skin and subcutaneous tissue                            | Itil                                  | Lf                 | Fs                              | Bt                                | 1  |
|                                              |                                   |            | Pregnancy, birth and puerperium                         | Birth                                 | Lf, Sd             | If, MI                          | Or                                | 2  |
| <i>Daucus carota</i> L. (FC704)              | Zanahoria, zanahoria española     | Cultivated | Blood and cardio-vascular system                        | Anemia                                | Ro                 | If, MI                          | Or                                | 14 |
|                                              |                                   |            | Nervous system and mental health                        | Insomnia                              | Ro                 | Dc                              | Or                                | 1  |

|                                                          |                             |            |                                             |                                             |                        |                                 |                                   |        |    |    |   |
|----------------------------------------------------------|-----------------------------|------------|---------------------------------------------|---------------------------------------------|------------------------|---------------------------------|-----------------------------------|--------|----|----|---|
| <i>Daucus montanus</i> Humb. & Bonpl. ex Schult. (FC703) | Culantrillo, hierba del cui | Wild       | Pregnancy, birth and puerperium             | Postpartum Birth                            | Fr<br>Fr, Lf           | If<br>Dc, If                    | Or<br>Or                          | 1<br>2 |    |    |   |
|                                                          |                             |            | Sensory system                              | Visual disorders                            | Lf, Ro                 | Dc, If, Jc, MI                  | Ew                                | 39     |    |    |   |
|                                                          |                             |            | Skin and subcutaneous tissue                | Burns                                       | Ro                     | MI                              | Kn                                | 1      |    |    |   |
|                                                          |                             |            | Cultural diseases and disorders             | Susto, espanto                              | Lf                     | Fs                              | Bt                                | 1      |    |    |   |
|                                                          |                             |            | Digestive system                            | Stomach cramps                              | Lf                     | If                              | Or                                | 1      |    |    |   |
|                                                          |                             |            |                                             | Stomach pain                                | Lf                     | If                              | Or                                | 1      |    |    |   |
|                                                          |                             |            | Digestive system                            | Stomach cramps                              | Lf                     | If                              | Or                                | 3      |    |    |   |
| <i>Foeniculum vulgare</i> Mill. (FC700)                  | Hinojo                      | Wild       |                                             | Diarrhoea                                   | Lf                     | If                              | Or                                | 2      |    |    |   |
|                                                          |                             |            | Pregnancy, birth and puerperium             | Breastfeeding                               | Lf, Sd                 | Fs, If                          | Or                                | 2      |    |    |   |
|                                                          |                             |            | Reproductive system and reproductive health | Menstruation disorders                      | Ep                     | Dc                              | Or                                | 1      |    |    |   |
|                                                          |                             |            | Sensory system                              | Visual disorders                            | Lf                     | Dc                              | Bt                                | 1      |    |    |   |
|                                                          |                             |            | Blood and cardio-vascular system            | High pressure                               | Ep, Lf, Ro             | Dc, Fs, If, Jc, MI              | Or                                | 18     |    |    |   |
|                                                          |                             |            |                                             | Anemia                                      | Ep, Fr, Lf             | Dc, MI                          | Or                                | 3      |    |    |   |
|                                                          |                             |            |                                             | Stomach cramps                              | Lf                     | If                              | Or                                | 2      |    |    |   |
| <i>Petroselinum crispus</i> (Mill.) Fuss (FC701)         | Perejil                     | Cultivated | Digestive system                            | Intestinal parasites                        | Lf                     | Dc                              | Or                                | 2      |    |    |   |
|                                                          |                             |            |                                             | Diarrhoea                                   | Lf                     | Dc                              | Or                                | 1      |    |    |   |
|                                                          |                             |            | General ailments with unspecific symptoms   | Headache                                    | Ro                     | MI                              | Or                                | 1      |    |    |   |
|                                                          |                             |            | Dental health                               | Toothache                                   | Lf                     | Fs                              | Or                                | 1      |    |    |   |
|                                                          |                             |            | Metabolic system and nutrition              | Weight loss                                 | Lf                     | If, MI                          | Or                                | 2      |    |    |   |
|                                                          |                             |            | Nervous system and mental health            | Insomnia                                    | Ep                     | If                              | Or                                | 1      |    |    |   |
|                                                          |                             |            | Other uses                                  | Hair loss                                   | Ro                     | MI                              | Bt                                | 1      |    |    |   |
|                                                          |                             |            | Pregnancy, birth and puerperium             | Postpartum Birth                            | Ep<br>Lf               | MI<br>Dc, If                    | Or                                | 1<br>4 |    |    |   |
|                                                          |                             |            |                                             | Abortive                                    | Ro                     | Dc                              | Or                                | 2      |    |    |   |
|                                                          |                             |            |                                             | Reproductive system and reproductive health | Menstruation disorders | Ep, Lf, Ro                      | Dc, If, MI                        | Or     | 28 |    |   |
|                                                          |                             |            |                                             | Menopause                                   | Ep, Lf, Ro             | If, MI                          | Or                                | 7      |    |    |   |
|                                                          |                             |            | Urinary system                              | Prostate disorders                          | Ep, Lf                 | If                              | Or                                | 2      |    |    |   |
|                                                          |                             |            | Apocynaceae                                 |                                             |                        |                                 |                                   |        |    |    |   |
|                                                          |                             |            | <i>Catharanthus roseus</i> (L.) G.Don       | Planta chuela                               | Wild                   | Cultural diseases and disorders | Antimonia, gentil, viejo, antiguo | Lf     | Dc | Bt | 1 |
| Reproductive system and reproductive health              | Menopause                   | Lf         |                                             |                                             |                        | If                              | Or                                | 2      |    |    |   |
| <i>Metastelma quitense</i> (K. Schum.) Liede (FC706)     | Diegolope                   | Wild       | Digestive system                            | Diarrhoea                                   | Bk                     | MI                              | Or                                | 1      |    |    |   |
|                                                          |                             |            | Sensory system                              | Hearing disorders                           | Lf                     | Dc, MI, Wm                      | Bt, Kn                            | 5      |    |    |   |
|                                                          |                             |            | Muscular-skeletal system                    | Joint sprains                               | Lf                     | If                              | Bt                                | 1      |    |    |   |
| Aquifoliaceae                                            |                             |            |                                             |                                             |                        |                                 |                                   |        |    |    |   |
| <i>Ilex guayusa</i> Loes. (FC707)                        | Huayusa, guayusa            | Cultivated | Metabolic system and nutrition              | Weight loss                                 | Lf                     | Dc                              | Or                                | 1      |    |    |   |
| Arecaceae                                                |                             |            |                                             |                                             |                        |                                 |                                   |        |    |    |   |
| <i>Cocos nucifera</i> L. (FC709)                         | Coco                        | Cultivated | Digestive system                            | Diarrhoea                                   | Fr                     | Fs, MI                          | Or                                | 2      |    |    |   |
|                                                          |                             |            | Endocrine system                            | Diabetes                                    | Fr                     | Fs                              | Or                                | 1      |    |    |   |
| <i>Mauritia flexuosa</i> L.f. (FC708)                    | Aguaje                      | Cultivated | Reproductive system and reproductive health | Menopause                                   | Fr                     | Jc                              | Or                                | 2      |    |    |   |
|                                                          |                             |            |                                             | Aphrodisiac                                 | Fr                     | Fs                              | Or                                | 1      |    |    |   |
| Asparagaceae                                             |                             |            |                                             |                                             |                        |                                 |                                   |        |    |    |   |
| <i>Agave americana</i> L. (FC710)                        | Penca azul                  | Wild       | Cultural diseases and disorders             | Tijte                                       | Lp                     | Fs, If, Wm                      | Kn, Or, Pl                        | 6      |    |    |   |
|                                                          |                             |            | Reproductive system and reproductive health | Fertility                                   | Lp                     | If                              | Or                                | 1      |    |    |   |

|                                                                                             |                                        |            |                                             |                                       |            |                    |            |     |
|---------------------------------------------------------------------------------------------|----------------------------------------|------------|---------------------------------------------|---------------------------------------|------------|--------------------|------------|-----|
| <i>Furcraea andina</i> Trel. (FC711)                                                        | Penca blanca, penca verde de Castilla  | Wild       | Digestive system                            | Diarrhoea                             | Bk         | Dc                 | Or         | 1   |
| <b>Balanophoraceae</b>                                                                      |                                        |            |                                             |                                       |            |                    |            |     |
| <i>Corynaea crassa</i> Hook. f. (FC712)                                                     | Para para                              | Wild       | Reproductive system and reproductive health | Fertility                             | Ep         | Fm                 | Or         | 1   |
|                                                                                             |                                        |            | Urinary system                              | Kidney disorders, emollient, diuretic | Ro         | If                 | Or         | 1   |
| <i>Ullucus tuberosus</i> Caldas (FC713)                                                     | Oyuco                                  | Cultivated | Pregnancy, birth and puerperium             | Birth                                 | Ro         | Dc, Fs, If, Jc, MI | Or         | 53  |
|                                                                                             |                                        |            |                                             | Postpartum                            | Ro         | Dc                 | Or         | 1   |
|                                                                                             |                                        |            | Blood and cardio-vascular system            | High pressure                         | Ro         | Dc                 | Or         | 2   |
| <b>Betulaceae</b>                                                                           |                                        |            |                                             |                                       |            |                    |            |     |
|                                                                                             |                                        |            |                                             | Susto, espanto                        | Lf         | Dc                 | Or         | 1   |
|                                                                                             |                                        |            | Cultural diseases and disorders             | Pulsario                              | Lf         | Fs                 | Pl         | 1   |
|                                                                                             |                                        |            |                                             | Tacsho                                | Lf         | Fs                 | Bt         | 1   |
|                                                                                             |                                        |            | General ailments with unspecific symptoms   | General malaise                       | Lf         | Fs, If             | Bt, Pl     | 2   |
| <i>Alnus acuminata</i> Kunth (FC714)                                                        | Aliso                                  | Wild       |                                             | Fever                                 | Lf         | Fs, If             | Or, Pl     | 2   |
|                                                                                             |                                        |            |                                             | Joint sprains                         | Lf         | Fs                 | Pl         | 2   |
|                                                                                             |                                        |            | Muscular-skeletal system                    | Rheumatism                            | Lf         | Dc, MI             | Bt, Kn, Or | 3   |
|                                                                                             |                                        |            |                                             | Hernia                                | Lf         | MI                 | Pl         | 2   |
|                                                                                             |                                        |            | Respiratory system                          | Flu                                   | Lf         | If                 | Or         | 1   |
| <b>Bignoniaceae</b>                                                                         |                                        |            |                                             |                                       |            |                    |            |     |
| <i>Handroanthus serratifolius</i> (Vahl) S.O.Grose                                          | Tahuari                                | Wild       | Infections and infestations                 | UTA, leishmaniasis                    | Ep         | MI                 | Pl         | 1   |
|                                                                                             |                                        |            | Cultural diseases and disorders             | Pulsario                              | Lf         | Fs                 | Pl         | 1   |
| <i>Tecoma stans</i> (L.) Juss. ex Kunth (FC716)                                             | Putquero, pichunche, putquero amarillo | Wild       | Pregnancy, birth and puerperium             | Birth                                 | Fl, Lf     | If                 | Or         | 4   |
| <i>Tecoma stans</i> (L.) Juss. ex Kunth var. <i>sambucifolia</i> (Kunth) J.R.I.Wood (FC715) | Ciza                                   | Wild       | Digestive system                            | Laxative                              | St         | MI                 | Or         | 1   |
| <b>Bixaceae</b>                                                                             |                                        |            |                                             |                                       |            |                    |            |     |
|                                                                                             |                                        |            |                                             | Intestinal parasites                  | Sd         | If                 | Or         | 1   |
|                                                                                             |                                        |            | Digestive system                            | Hepatitis                             | Sd         | Fs                 | Or         | 1   |
|                                                                                             |                                        |            | General ailments with unspecific symptoms   | Headache                              | Lf         | If                 | Or         | 1   |
| <i>Bixa orellana</i> L. (FC717)                                                             | Achiote                                | Wild       | Skin and subcutaneous tissue                | Burns                                 | Fr         | MI                 | Pl         | 1   |
|                                                                                             |                                        |            |                                             | Prostate disorders                    | Ep, Lf     | Dc, If, MI         | Or         | 108 |
|                                                                                             |                                        |            | Urinary system                              | Kidney disorders, emollient, diuretic | Lf         | If                 | Or         | 4   |
| <b>Boraginaceae</b>                                                                         |                                        |            |                                             |                                       |            |                    |            |     |
|                                                                                             |                                        |            | Reproductive system and reproductive health | Menopause                             | Fl         | If                 | Or         | 1   |
| <i>Borago officinalis</i> L. (FC718)                                                        | Borraja                                | Cultivated | Digestive system                            | Stomach cramps                        | Lf         | If                 | Or         | 1   |
|                                                                                             |                                        |            | Respiratory system                          | Cough                                 | Ep, Fl, Lf | Dc, If             | Or         | 9   |
|                                                                                             |                                        |            |                                             | Flu                                   | Lf         | Dc, Fs, If         | Or         | 6   |
| <i>Cordia lutea</i> Lam.                                                                    | Flor de overo                          | Wild       | Digestive system                            | Hepatitis                             | Fl         | Dc                 | Or         | 1   |
|                                                                                             |                                        |            | Metabolic system and nutrition              | Weight loss                           | Sd         | If                 | Or         | 1   |
| <i>Tiquilia paronychioides</i> (Phil.) A.T. Richardson                                      | Flor de arena                          | Cultivated |                                             | Kidney disorders, emollient, diuretic | Fl         | If                 | Or         | 1   |
|                                                                                             |                                        |            | Urinary system                              |                                       |            |                    |            |     |
| <b>Brassicaceae</b>                                                                         |                                        |            |                                             |                                       |            |                    |            |     |
| <i>Brassica oleracea</i> L. var. <i>acephala</i> DC. (FC720)                                | Col, repollo                           | Cultivated | Blood and cardio-vascular system            | Anemia                                | Lf         | Dc                 | Or         | 3   |

|                                                                           |                         |            |                                             |                                                          |        |            |        |        |
|---------------------------------------------------------------------------|-------------------------|------------|---------------------------------------------|----------------------------------------------------------|--------|------------|--------|--------|
| <i>Brassica oleracea</i> L. var. <i>italica</i> Plenck. (FC7190)          | Brócoli                 | Cultivated | Pregnancy, birth and puerperium             | Breastfeeding Birth                                      | Lf     | Dc, Fs, If | Or     | 46     |
|                                                                           |                         |            | Sensory system                              | Visual disorders                                         | Lf     | If, Ml     | Bt, Ew | 3      |
|                                                                           |                         |            | Blood and cardio-vascular system            | Anemia                                                   | Fr     | Fs         | Or     | 1      |
|                                                                           |                         |            | Other uses                                  | Cancer                                                   | Fr     | If         | Or     | 1      |
| <i>Erysimum</i> × <i>cheiri</i> (L.) Crantz                               | Alhelí                  | Cultivated | Infections and infestations                 | Chickenpox                                               | Fl     | If         | Kn     | 1      |
|                                                                           |                         |            | Blood and cardio-vascular system            | Anemia                                                   | Fr     | Dd, Ml     | Or     | 2      |
| <i>Lepidium meyenii</i> Walp. (FC563)                                     | Maca                    | Cultivated | Pregnancy, birth and puerperium             | Birth                                                    | Fr     | Ml         | Or     | 1      |
|                                                                           |                         |            | Reproductive system and reproductive health | Aphrodisiac Menopause                                    | Fr, Ro | Dc, If     | Or     | 3      |
|                                                                           |                         |            | Blood and cardio-vascular system            | Anemia                                                   | Fr     | Dd, Ml     | Or     | 2      |
| <i>Raphanus sativus</i> L. (FC721)                                        | Rabanito                | Cultivated | Blood and cardio-vascular system            | Anemia                                                   | Fr     | Fs         | Or     | 1      |
|                                                                           |                         |            | Reproductive system and reproductive health | Menstruation disorders                                   | Fr     | Ml         | Or     | 1      |
|                                                                           |                         |            | Blood and cardio-vascular system            | Anemia                                                   | Lf     | Fs         | Or     | 1      |
|                                                                           |                         |            | Skin and subcutaneous tissue                | Wounds, healing                                          | Lf     | Dc         | Bt     | 1      |
| <i>Rorippa nasturtium-aquaticum</i> (L.) Hayek (FC722)                    | Berros, verso, versillo | Wild       | Urinary system                              | Kidney disorders, emollient, diuretic Prostate disorders | Lf     | If         | Or     | 1      |
|                                                                           |                         |            |                                             |                                                          | Lf     | If         | Or     | 1      |
|                                                                           |                         |            |                                             |                                                          | Lf     | If         | Or     | 1      |
| Bromeliaceae                                                              |                         |            |                                             |                                                          |        |            |        |        |
| <i>Ananas comosus</i> (L.) Merr. (FC723)                                  | Piña                    | Cultivated | Blood and cardio-vascular system            | High pressure                                            | Ec     | Fs, Jc, Ml | Or     | 6      |
|                                                                           |                         |            |                                             | Hemorrhoids                                              | Ec     | Jc         | Or     | 1      |
|                                                                           |                         |            |                                             | Diarrhoea                                                | Ec     | Fs         | Or     | 1      |
|                                                                           |                         |            | Digestive system                            | Stomach pain                                             | Ec     | Fs         | Or     | 1      |
|                                                                           |                         |            |                                             | Indigestive                                              | Ec     | Fs         | Or     | 2      |
|                                                                           |                         |            | Metabolic system and nutrition              | Weight loss                                              | Ec     | Fs, Jc, Ml | Or     | 8      |
|                                                                           |                         |            |                                             | Kidney disorders, emollient, diuretic Prostate disorders | Ec     | Dc, Fs, Jc | Or     | 13     |
|                                                                           |                         |            | Urinary system                              |                                                          | Ec     | Dc, Fs, Jc | Or     | 3      |
|                                                                           |                         |            |                                             | Burseraceae                                              |        |            |        |        |
| <i>Bursera graveolens</i> (Kunth) Triana & Planch. (FC577)                | Palo santo              | Cultivated | Cultural diseases and disorders             | Susto, espanto                                           | Lf     | If         | Bt     | 1      |
|                                                                           |                         |            | Infections and infestations                 | Insect bite                                              | Lf     | Ml         | Pl     | 1      |
| Cactaceae                                                                 |                         |            |                                             |                                                          |        |            |        |        |
| <i>Opuntia ficus-indica</i> (L.) Mill. (FC725)                            | Tuna                    | Cultivated | Digestive system                            | Diarrhoea                                                | Lp     | Fs, Ml     | Or     | 7      |
|                                                                           |                         |            |                                             | Gastric ulcers                                           | Lp     | Fs, Ml     | Or     | 2      |
|                                                                           |                         |            | Endocrine system                            | Diabetes                                                 | Lp     | Ml         | Or     | 4      |
|                                                                           |                         |            |                                             | Other uses                                               | Cancer | Lp         | Fs, Ml | Bt, Or |
|                                                                           |                         |            | Reproductive system and reproductive health | Menopause                                                | Lp     | Fs, Ml     | Bt, Or | 2      |
|                                                                           |                         |            | Blood and cardio-vascular system            | High pressure                                            | Lp     | Ml         | Or     | 1      |
| <i>Stenocereus queretaroensis</i> (F.A.C. Weber ex Mathes.) Buxb. (FC725) | Pitajaya                | Cultivated | Digestive system                            | Laxative                                                 | Fr     | Fs, If, Ml | Or     | 19     |
| Cannaceae                                                                 |                         |            |                                             |                                                          |        |            |        |        |
| <i>Canna indica</i> L. (FC726)                                            | Achira                  | Cultivated | Digestive system                            | Laxative                                                 | Lf     | If         | Or     | 1      |
| Capparaceae                                                               |                         |            |                                             |                                                          |        |            |        |        |
| <i>Capparicordis crotonoides</i> (Kunth) Iltis & Cornejo                  | Simuro                  | Wild       | General ailments with unspecific symptoms   | Headache                                                 | Lf     | Wm         | Pl     | 1      |
| Caprifoliaceae                                                            |                         |            |                                             |                                                          |        |            |        |        |
| <i>Valeriana adscendens</i> Turcz. (FC727)                                | Valeriana               | Wild       | Blood and cardio-vascular system            | High pressure                                            | Ro     | Dc         | Or     | 1      |

|                                                                     |                                                  |            |                                             |                                       |                |                |            |    |
|---------------------------------------------------------------------|--------------------------------------------------|------------|---------------------------------------------|---------------------------------------|----------------|----------------|------------|----|
|                                                                     |                                                  |            | Nervous system and mental health            | Insomnia                              | Ep, Lf, Ro     | Dc, If         | Or         | 43 |
|                                                                     |                                                  |            | Reproductive system and reproductive health | Menopause                             | Lf             | If             | Or         | 1  |
|                                                                     |                                                  |            | <b>Caricaceae</b>                           |                                       |                |                |            |    |
|                                                                     |                                                  |            | Blood and cardio-vascular system            | Hemorrhoids                           | Fr             | Fs             | Or         | 1  |
|                                                                     |                                                  |            | Cultural diseases and disorders             | Tijte                                 | Bk, Lf, Lx, Sd | Fs, Ml, Wm     | Bt, Kn, Pl | 7  |
|                                                                     |                                                  |            |                                             | Intestinal parasites                  | Sd             | Ml             | Or         | 6  |
|                                                                     |                                                  |            |                                             | Liver disorders                       | Fr             | Fs             | Or         | 4  |
|                                                                     |                                                  |            |                                             | Stomach cramps                        | Lx             | Fs             | Or         | 1  |
|                                                                     |                                                  |            | Digestive system                            | Laxative                              | Fr, Sd         | Fs, If, Jc, Ml | Or         | 20 |
|                                                                     |                                                  |            |                                             | Diarrhoea                             | Fr             | Fs, Jc         | Or         | 5  |
|                                                                     |                                                  |            |                                             | Indigestive                           | Fr             | Fs             | Or         | 18 |
| <i>Carica papaya</i> L. (FC729)                                     | Papaya                                           | Cultivated |                                             | Stomach pain                          | Fr             | Fs             | Or         | 4  |
|                                                                     |                                                  |            |                                             | UTA, leishmaniasis                    | Lx             | Fs             | Bt         | 1  |
|                                                                     |                                                  |            |                                             | Fleas                                 | Sd             | Ml             | Bt         | 1  |
|                                                                     |                                                  |            | Metabolic system and nutrition              | Weight loss                           | Fr             | Jc             | Or         | 1  |
|                                                                     |                                                  |            | Nervous system and mental health            | Stress                                | Fr             | Fs             | Or         | 1  |
|                                                                     |                                                  |            |                                             | Mental stimulant                      | Fr             | Fs             | Or         | 1  |
|                                                                     |                                                  |            | Sensory system                              | Visual disorders                      | Fr             | Fs             | Or         | 1  |
|                                                                     |                                                  |            |                                             | Kidney disorders, emollient, diuretic |                |                |            |    |
|                                                                     |                                                  |            | Urinary system                              |                                       | Fr             | Fs             | Or         | 1  |
| <i>Vasconcellea microcarpa</i> (Jacq.) A. DC. (FC331)               | Maushán                                          | Cultivated | Reproductive system and reproductive health | Vaginal infection                     | Fr             | If             | Or         | 1  |
|                                                                     |                                                  |            | <b>Caryophyllaceae</b>                      |                                       |                |                |            |    |
| <i>Dianthus caryophyllus</i> L. (FC730)                             | Clavel                                           | Cultivated | Nervous system and mental health            | Sadness                               | Fl             | If             | Or         | 1  |
|                                                                     |                                                  |            | <b>Celastraceae</b>                         |                                       |                |                |            |    |
| <i>Maytenus macrocarpa</i> (Ruiz & Pav.) Briq. (FC731)              | Chuchuasi                                        | Cultivated | Skin and subcutaneous tissue                | Acne                                  | Bk             | Fm             | Or         | 1  |
|                                                                     |                                                  |            | Digestive system                            | Stomach cramps                        | Bk             | Fm             | Or         | 1  |
|                                                                     |                                                  |            | <b>Chloranthaceae</b>                       |                                       |                |                |            |    |
| <i>Hedyosmum scabrum</i> (Ruiz & Pav.) Solms (FC732)                | Pirgay, pitillo, huacamuyo                       | Wild       | Pregnancy, birth and puerperium             | Breastfeeding                         | Lf             | Dc             | Or         | 1  |
|                                                                     |                                                  |            | Digestive system                            | Diarrhoea                             | Lf             | Fs             | Or         | 1  |
|                                                                     |                                                  |            | <b>Compositae</b>                           |                                       |                |                |            |    |
| <i>Acanthoxanthium spinosum</i> (L.) Fourr. (FC748)                 | Juan Alonso                                      | Wild       | Reproductive system and reproductive health | Menstruation disorders                | Lf             | If             | Or         | 1  |
| <i>Achyrocline alata</i> (Kunth) DC. (FC759)                        | Huira huira, vira vira, postersatra, fostersacha | Wild       | Urinary system                              | Kidney disorders, emollient, diuretic | Lf             | Dc             | Or         | 1  |
| <i>Ageratina exsertovenosa</i> (Klatt) R.M. King & H. Rob. (FC743)  | Cruzsacha                                        | Wild       | Digestive system                            | Stomach cramps                        | Lf             | If             | Or         | 1  |
|                                                                     |                                                  |            |                                             | Prostate disorders                    | Lf             | If             | Or         | 1  |
| <i>Ageratina glechonophylla</i> (Less.) R.M. King & H. Rob. (FC746) | Guarme guarme                                    | Wild       | Urinary system                              | Kidney disorders, emollient, diuretic | Lf             | Dc             | Bt, Or     | 2  |
|                                                                     |                                                  |            | Muscular-skeletal system                    | Joint sprains                         | Lf             | Wm             | Bt         | 1  |
|                                                                     |                                                  |            |                                             | Antimonia, gentil, viejo, antiguo     | Lf             | If             | Pl         | 1  |
| <i>Ambrosia peruviana</i> Willd. (FC753)                            | Marco                                            | Wild       | Cultural diseases and disorders             | Aire, malaire                         | Lf             | If             | Bt         | 1  |
|                                                                     |                                                  |            |                                             | Tijte                                 | Lf             | If             | Or         | 1  |
|                                                                     |                                                  |            | General ailments with unspecific symptoms   | Headache                              | Lf             | If             | Bt         | 1  |

|                                             |                                       |        |                                             |                                       |        |                |        |   |
|---------------------------------------------|---------------------------------------|--------|---------------------------------------------|---------------------------------------|--------|----------------|--------|---|
| <i>Artemisia absinthium</i> L.<br>(FC734)   | Ajenjo                                | Wild   | Infections and infestations                 | Lice                                  | Ep     | Ml             | Kn     | 1 |
|                                             |                                       |        |                                             | Tick bites                            | Lf     | Fs             | Pl     | 1 |
|                                             |                                       |        |                                             | Fleas                                 | Lf     | Dc, Fs, If, Ml | Bt, Kn | 8 |
|                                             |                                       |        | Skin and subcutaneous tissue                | Feet fungus                           | Lf     | Dc             | Or     | 1 |
|                                             |                                       |        |                                             | Wounds, healing                       | Lf     | Dc             | Bt     | 1 |
|                                             |                                       |        | Pregnancy, birth and puerperium             | Abortive                              | Lf     | If             | Or     | 1 |
|                                             |                                       |        | Muscular-skeletal system                    | Rheumatism                            | Lf     | Dc, If         | Bt, Pl | 2 |
|                                             |                                       |        | Muscular-skeletal system                    | Rheumatism                            | Lf     | Fm, If         | Bt, Kn | 2 |
|                                             |                                       |        |                                             | Joint sprains                         | Lf     | Fm             | Kn     | 1 |
|                                             |                                       |        | Cultural diseases and disorders             | Tacsho                                | Lf     | Fs             | Bt     | 1 |
|                                             |                                       |        | Skin and subcutaneous tissue                | Wounds, healing                       | Lf     | Dc             | Bt     | 1 |
|                                             |                                       |        |                                             | Stomach cramps                        | Lf     | If             | Or     | 4 |
|                                             |                                       |        | Digestive system                            | Diarrhoea                             | Lf     | If             | Or     | 2 |
|                                             |                                       |        |                                             | Stomach infection                     | Lf     | If             | Or     | 1 |
|                                             |                                       |        | Infections and infestations                 | Fleas                                 | Lf     | Dc, If         | Bt     | 2 |
|                                             |                                       |        |                                             | Chickenpox                            | Lf     | Dc             | Bt     | 1 |
|                                             |                                       |        | Pregnancy, birth and puerperium             | Abortive                              | Lf     | If             | Or     | 1 |
|                                             |                                       |        |                                             | Postpartum                            | Ep     | Dc             | Or     | 1 |
|                                             |                                       |        | Reproductive system and reproductive health | Menstruation disorders                | Ep, Lf | Dc             | Or     | 2 |
|                                             |                                       |        |                                             | Kidney disorders, emollient, diuretic | Lf     | If             | Or     | 1 |
| Urinary system                              | Stomach cramps                        | Lf     | If                                          | Or                                    | 4      |                |        |   |
|                                             | Diarrhoea                             | Lf     | If                                          | Or                                    | 2      |                |        |   |
| Digestive system                            | Stomach cramps                        | Lf     | Dc                                          | Or                                    | 1      |                |        |   |
|                                             | Stomach infection                     | Lf     | If                                          | Or                                    | 1      |                |        |   |
| Infections and infestations                 | Fleas                                 | Lf     | Dc, If                                      | Bt                                    | 2      |                |        |   |
|                                             | Chickenpox                            | Lf     | Dc                                          | Bt                                    | 1      |                |        |   |
| Pregnancy, birth and puerperium             | Abortive                              | Lf     | If                                          | Or                                    | 1      |                |        |   |
|                                             | Postpartum                            | Ep     | Dc                                          | Or                                    | 1      |                |        |   |
| Reproductive system and reproductive health | Menstruation disorders                | Ep, Lf | Dc                                          | Or                                    | 2      |                |        |   |
|                                             | Kidney disorders, emollient, diuretic | Lf     | If                                          | Or                                    | 1      |                |        |   |
| Urinary system                              | Stomach cramps                        | Lf     | If                                          | Or                                    | 4      |                |        |   |
|                                             | Diarrhoea                             | Lf     | If                                          | Or                                    | 2      |                |        |   |
| Digestive system                            | Stomach cramps                        | Lf     | Dc                                          | Or                                    | 1      |                |        |   |
|                                             | Stomach infection                     | Lf     | If                                          | Or                                    | 1      |                |        |   |
| Infections and infestations                 | Fleas                                 | Lf     | Dc, If                                      | Bt                                    | 2      |                |        |   |
|                                             | Chickenpox                            | Lf     | Dc                                          | Bt                                    | 1      |                |        |   |
| Pregnancy, birth and puerperium             | Abortive                              | Lf     | If                                          | Or                                    | 1      |                |        |   |
|                                             | Postpartum                            | Ep     | Dc                                          | Or                                    | 1      |                |        |   |
| Reproductive system and reproductive health | Menstruation disorders                | Ep, Lf | Dc                                          | Or                                    | 2      |                |        |   |
|                                             | Kidney disorders, emollient, diuretic | Lf     | If                                          | Or                                    | 1      |                |        |   |
| Urinary system                              | Stomach cramps                        | Lf     | If                                          | Or                                    | 4      |                |        |   |
|                                             | Diarrhoea                             | Lf     | If                                          | Or                                    | 2      |                |        |   |
| Digestive system                            | Stomach cramps                        | Lf     | Dc                                          | Or                                    | 1      |                |        |   |
|                                             | Stomach infection                     | Lf     | If                                          | Or                                    | 1      |                |        |   |
| Infections and infestations                 | Fleas                                 | Lf     | Dc, If                                      | Bt                                    | 2      |                |        |   |
|                                             | Chickenpox                            | Lf     | Dc                                          | Bt                                    | 1      |                |        |   |
| Pregnancy, birth and puerperium             | Abortive                              | Lf     | If                                          | Or                                    | 1      |                |        |   |
|                                             | Postpartum                            | Ep     | Dc                                          | Or                                    | 1      |                |        |   |
| Reproductive system and reproductive health | Menstruation disorders                | Ep, Lf | Dc                                          | Or                                    | 2      |                |        |   |
|                                             | Kidney disorders, emollient, diuretic | Lf     | If                                          | Or                                    | 1      |                |        |   |
| Urinary system                              | Stomach cramps                        | Lf     | If                                          | Or                                    | 4      |                |        |   |
|                                             | Diarrhoea                             | Lf     | If                                          | Or                                    | 2      |                |        |   |
| Digestive system                            | Stomach cramps                        | Lf     | Dc                                          | Or                                    | 1      |                |        |   |
|                                             | Stomach infection                     | Lf     | If                                          | Or                                    | 1      |                |        |   |
| Infections and infestations                 | Fleas                                 | Lf     | Dc, If                                      | Bt                                    | 2      |                |        |   |
|                                             | Chickenpox                            | Lf     | Dc                                          | Bt                                    | 1      |                |        |   |
| Pregnancy, birth and puerperium             | Abortive                              | Lf     | If                                          | Or                                    | 1      |                |        |   |
|                                             | Postpartum                            | Ep     | Dc                                          | Or                                    | 1      |                |        |   |
| Reproductive system and reproductive health | Menstruation disorders                | Ep, Lf | Dc                                          | Or                                    | 2      |                |        |   |
|                                             | Kidney disorders, emollient, diuretic | Lf     | If                                          | Or                                    | 1      |                |        |   |
| Urinary system                              | Stomach cramps                        | Lf     | If                                          | Or                                    | 4      |                |        |   |
|                                             | Diarrhoea                             | Lf     | If                                          | Or                                    | 2      |                |        |   |
| Digestive system                            | Stomach cramps                        | Lf     | Dc                                          | Or                                    | 1      |                |        |   |
|                                             | Stomach infection                     | Lf     | If                                          | Or                                    | 1      |                |        |   |
| Infections and infestations                 | Fleas                                 | Lf     | Dc, If                                      | Bt                                    | 2      |                |        |   |
|                                             | Chickenpox                            | Lf     | Dc                                          | Bt                                    | 1      |                |        |   |
| Pregnancy, birth and puerperium             | Abortive                              | Lf     | If                                          | Or                                    | 1      |                |        |   |
|                                             | Postpartum                            | Ep     | Dc                                          | Or                                    | 1      |                |        |   |
| Reproductive system and reproductive health | Menstruation disorders                | Ep, Lf | Dc                                          | Or                                    | 2      |                |        |   |
|                                             | Kidney disorders, emollient, diuretic | Lf     | If                                          | Or                                    | 1      |                |        |   |
| Urinary system                              | Stomach cramps                        | Lf     | If                                          | Or                                    | 4      |                |        |   |
|                                             | Diarrhoea                             | Lf     | If                                          | Or                                    | 2      |                |        |   |
| Digestive system                            | Stomach cramps                        | Lf     | Dc                                          | Or                                    | 1      |                |        |   |
|                                             | Stomach infection                     | Lf     | If                                          | Or                                    | 1      |                |        |   |
| Infections and infestations                 | Fleas                                 | Lf     | Dc, If                                      | Bt                                    | 2      |                |        |   |
|                                             | Chickenpox                            | Lf     | Dc                                          | Bt                                    | 1      |                |        |   |
| Pregnancy, birth and puerperium             | Abortive                              | Lf     | If                                          | Or                                    | 1      |                |        |   |
|                                             | Postpartum                            | Ep     | Dc                                          | Or                                    | 1      |                |        |   |
| Reproductive system and reproductive health | Menstruation disorders                | Ep, Lf | Dc                                          | Or                                    | 2      |                |        |   |
|                                             | Kidney disorders, emollient, diuretic | Lf     | If                                          | Or                                    | 1      |                |        |   |
| Urinary system                              | Stomach cramps                        | Lf     | If                                          | Or                                    | 4      |                |        |   |
|                                             | Diarrhoea                             | Lf     | If                                          | Or                                    | 2      |                |        |   |
| Digestive system                            | Stomach cramps                        | Lf     | Dc                                          | Or                                    | 1      |                |        |   |
|                                             | Stomach infection                     | Lf     | If                                          | Or                                    | 1      |                |        |   |
| Infections and infestations                 | Fleas                                 | Lf     | Dc, If                                      | Bt                                    | 2      |                |        |   |
|                                             | Chickenpox                            | Lf     | Dc                                          | Bt                                    | 1      |                |        |   |
| Pregnancy, birth and puerperium             | Abortive                              | Lf     | If                                          | Or                                    | 1      |                |        |   |
|                                             | Postpartum                            | Ep     | Dc                                          | Or                                    | 1      |                |        |   |
| Reproductive system and reproductive health | Menstruation disorders                | Ep, Lf | Dc                                          | Or                                    | 2      |                |        |   |
|                                             | Kidney disorders, emollient, diuretic | Lf     | If                                          | Or                                    | 1      |                |        |   |
| Urinary system                              | Stomach cramps                        | Lf     | If                                          | Or                                    | 4      |                |        |   |
|                                             | Diarrhoea                             | Lf     | If                                          | Or                                    | 2      |                |        |   |
| Digestive system                            | Stomach cramps                        | Lf     | Dc                                          | Or                                    | 1      |                |        |   |
|                                             | Stomach infection                     | Lf     | If                                          | Or                                    | 1      |                |        |   |
| Infections and infestations                 | Fleas                                 | Lf     | Dc, If                                      | Bt                                    | 2      |                |        |   |
|                                             | Chickenpox                            | Lf     | Dc                                          | Bt                                    | 1      |                |        |   |
| Pregnancy, birth and puerperium             | Abortive                              | Lf     | If                                          | Or                                    | 1      |                |        |   |
|                                             | Postpartum                            | Ep     | Dc                                          | Or                                    | 1      |                |        |   |
| Reproductive system and reproductive health | Menstruation disorders                | Ep, Lf | Dc                                          | Or                                    | 2      |                |        |   |
|                                             | Kidney disorders, emollient, diuretic | Lf     | If                                          | Or                                    | 1      |                |        |   |
| Urinary system                              | Stomach cramps                        | Lf     | If                                          | Or                                    | 4      |                |        |   |
|                                             | Diarrhoea                             | Lf     | If                                          | Or                                    | 2      |                |        |   |
| Digestive system                            | Stomach cramps                        | Lf     | Dc                                          | Or                                    | 1      |                |        |   |
|                                             | Stomach infection                     | Lf     | If                                          | Or                                    | 1      |                |        |   |
| Infections and infestations                 | Fleas                                 | Lf     | Dc, If                                      | Bt                                    | 2      |                |        |   |
|                                             | Chickenpox                            | Lf     | Dc                                          | Bt                                    | 1      |                |        |   |
| Pregnancy, birth and puerperium             | Abortive                              | Lf     | If                                          | Or                                    | 1      |                |        |   |
|                                             | Postpartum                            | Ep     | Dc                                          | Or                                    | 1      |                |        |   |
| Reproductive system and reproductive health | Menstruation disorders                | Ep, Lf | Dc                                          | Or                                    | 2      |                |        |   |
|                                             | Kidney disorders, emollient, diuretic | Lf     | If                                          | Or                                    | 1      |                |        |   |
| Urinary system                              | Stomach cramps                        | Lf     | If                                          | Or                                    | 4      |                |        |   |
|                                             | Diarrhoea                             | Lf     | If                                          | Or                                    | 2      |                |        |   |
| Digestive system                            | Stomach cramps                        | Lf     | Dc                                          | Or                                    | 1      |                |        |   |
|                                             | Stomach infection                     | Lf     | If                                          | Or                                    | 1      |                |        |   |
| Infections and infestations                 | Fleas                                 | Lf     | Dc, If                                      | Bt                                    | 2      |                |        |   |
|                                             | Chickenpox                            | Lf     | Dc                                          | Bt                                    | 1      |                |        |   |
| Pregnancy, birth and puerperium             | Abortive                              | Lf     | If                                          | Or                                    | 1      |                |        |   |
|                                             | Postpartum                            | Ep     | Dc                                          | Or                                    | 1      |                |        |   |
| Reproductive system and reproductive health | Menstruation disorders                | Ep, Lf | Dc                                          | Or                                    | 2      |                |        |   |
|                                             | Kidney disorders, emollient, diuretic | Lf     | If                                          | Or                                    | 1      |                |        |   |
| Urinary system                              | Stomach cramps                        | Lf     | If                                          | Or                                    | 4      |                |        |   |
|                                             | Diarrhoea                             | Lf     | If                                          | Or                                    | 2      |                |        |   |
| Digestive system                            | Stomach cramps                        | Lf     | Dc                                          | Or                                    | 1      |                |        |   |
|                                             | Stomach infection                     | Lf     | If                                          | Or                                    | 1      |                |        |   |
| Infections and infestations                 | Fleas                                 | Lf     | Dc, If                                      | Bt                                    | 2      |                |        |   |
|                                             | Chickenpox                            | Lf     | Dc                                          | Bt                                    | 1      |                |        |   |
| Pregnancy, birth and puerperium             | Abortive                              | Lf     | If                                          | Or                                    | 1      |                |        |   |
|                                             | Postpartum                            | Ep     | Dc                                          | Or                                    | 1      |                |        |   |
| Reproductive system and reproductive health | Menstruation disorders                | Ep, Lf | Dc                                          | Or                                    | 2      |                |        |   |
|                                             | Kidney disorders, emollient, diuretic | Lf     | If                                          | Or                                    | 1      |                |        |   |
| Urinary system                              | Stomach cramps                        | Lf     | If                                          | Or                                    | 4      |                |        |   |
|                                             | Diarrhoea                             | Lf     | If                                          | Or                                    | 2      |                |        |   |
| Digestive system                            | Stomach cramps                        | Lf     | Dc                                          | Or                                    | 1      |                |        |   |
|                                             | Stomach infection                     | Lf     | If                                          | Or                                    | 1      |                |        |   |
| Infections and infestations                 | Fleas                                 | Lf     | Dc, If                                      | Bt                                    | 2      |                |        |   |
|                                             | Chickenpox                            | Lf     | Dc                                          | Bt                                    | 1      |                |        |   |
| Pregnancy, birth and puerperium             | Abortive                              | Lf     | If                                          | Or                                    | 1      |                |        |   |
|                                             | Postpartum                            | Ep     | Dc                                          | Or                                    | 1      |                |        |   |
| Reproductive system and reproductive health | Menstruation disorders                | Ep, Lf | Dc                                          | Or                                    | 2      |                |        |   |
|                                             | Kidney disorders, emollient, diuretic | Lf     | If                                          | Or                                    | 1      |                |        |   |
| Urinary system                              | Stomach cramps                        | Lf     | If                                          | Or                                    | 4      |                |        |   |
|                                             | Diarrhoea                             | Lf     | If                                          | Or                                    | 2      |                |        |   |
| Digestive system                            | Stomach cramps                        | Lf     | Dc                                          | Or                                    | 1      |                |        |   |
|                                             | Stomach infection                     | Lf     | If                                          | Or                                    | 1      |                |        |   |
| Infections and infestations                 | Fleas                                 | Lf     | Dc, If                                      | Bt                                    | 2      |                |        |   |
|                                             | Chickenpox                            | Lf     | Dc                                          | Bt                                    | 1      |                |        |   |
| Pregnancy, birth and puerperium             | Abortive                              | Lf     | If                                          | Or                                    | 1      |                |        |   |
|                                             | Postpartum                            | Ep     | Dc                                          | Or                                    | 1      |                |        |   |
| Reproductive system and reproductive health | Menstruation disorders                | Ep, Lf | Dc                                          | Or                                    | 2      |                |        |   |
|                                             | Kidney disorders, emollient, diuretic | Lf     | If                                          | Or                                    | 1      |                |        |   |
| Urinary system                              | Stomach cramps                        | Lf     | If                                          | Or                                    | 4      |                |        |   |
|                                             | Diarrhoea                             | Lf     | If                                          | Or                                    | 2      |                |        |   |
| Digestive system                            | Stomach cramps                        | Lf     | Dc                                          | Or                                    | 1      |                |        |   |
|                                             | Stomach infection                     | Lf     | If                                          | Or                                    | 1      |                |        |   |
| Infections and infestations                 | Fleas                                 | Lf     | Dc, If                                      | Bt                                    | 2      |                |        |   |
|                                             | Chickenpox                            | Lf     | Dc                                          | Bt                                    | 1      |                |        |   |
| Pregnancy, birth and puerperium             | Abortive                              | Lf     | If                                          | Or                                    | 1      |                |        |   |
|                                             | Postpartum                            | Ep     | Dc                                          | Or                                    | 1      |                |        |   |
| Reproductive system and reproductive health | Menstruation disorders                | Ep, Lf | Dc                                          | Or                                    | 2      |                |        |   |
|                                             | Kidney disorders, emollient, diuretic | Lf     | If                                          | Or                                    | 1      |                |        |   |
| Urinary system                              | Stomach cramps                        | Lf     | If                                          | Or                                    | 4      |                |        |   |
|                                             | Diarrhoea                             | Lf     | If                                          | Or                                    | 2      |                |        |   |
| Digestive system                            | Stomach cramps                        | Lf     | Dc                                          | Or                                    | 1      |                |        |   |
|                                             | Stomach infection                     | Lf     | If                                          | Or                                    | 1      |                |        |   |
| Infections and infestations                 | Fleas                                 | Lf     | Dc, If                                      | Bt                                    | 2      |                |        |   |
|                                             | Chickenpox                            | Lf     | Dc                                          | Bt                                    | 1      |                |        |   |
| Pregnancy, birth and puerperium             | Abortive                              | Lf     | If                                          | Or                                    | 1      |                |        |   |
|                                             | Postpartum                            | Ep     | Dc                                          | Or                                    | 1      |                |        |   |
| Reproductive system and reproductive health | Menstruation disorders                | Ep, Lf | Dc                                          | Or                                    | 2      |                |        |   |
|                                             | Kidney disorders, emollient, diuretic | Lf     | If                                          | Or                                    | 1      |                |        |   |
| Urinary system                              | Stomach cramps                        | Lf     | If                                          | Or                                    | 4      |                |        |   |
|                                             | Diarrhoea                             | Lf     | If                                          | Or                                    | 2      |                |        |   |
| Digestive system                            | Stomach cramps                        | Lf     | Dc                                          | Or                                    | 1      |                |        |   |
|                                             | Stomach infection                     | Lf     | If                                          | Or                                    | 1      |                |        |   |
| Infections and infestations                 | Fleas                                 | Lf     | Dc, If                                      | Bt                                    | 2      |                |        |   |
|                                             | Chickenpox                            | Lf     | Dc                                          | Bt                                    | 1      |                |        |   |
| Pregnancy, birth and puerperium             | Abortive                              | Lf     | If                                          | Or                                    | 1      |                |        |   |
|                                             | Postpartum                            | Ep     | Dc                                          | Or                                    | 1      |                |        |   |
| Reproductive system and reproductive health | Menstruation disorders                | Ep, Lf | Dc                                          | Or                                    | 2      |                |        |   |
|                                             | Kidney disorders, emollient, diuretic | Lf     | If                                          | Or                                    | 1      |                |        |   |
| Urinary system                              | Stomach cramps                        | Lf     | If                                          | Or                                    | 4      |                |        |   |
|                                             | Diarrhoea                             | Lf     | If                                          | Or                                    | 2      |                |        |   |
| Digestive system                            | Stomach cramps                        | Lf     | Dc                                          | Or                                    | 1      |                |        |   |
|                                             | Stomach infection                     | Lf     | If                                          | Or                                    | 1      |                |        |   |
| Infections and infestations                 | Fleas                                 | Lf     | Dc, If                                      | Bt                                    | 2      |                |        |   |
|                                             | Chickenpox                            | Lf     | Dc                                          | Bt                                    | 1      |                |        |   |
| Pregnancy, birth and puerperium             | Abortive                              | Lf     | If                                          | Or                                    | 1      |                |        |   |
|                                             | Postpartum                            | Ep     | Dc                                          | Or                                    | 1      |                |        |   |
| Reproductive system and reproductive health | Menstruation disorders                | Ep, Lf | Dc                                          | Or                                    | 2      |                |        |   |
|                                             | Kidney disorders, emollient, diuretic | Lf     | If                                          | Or                                    | 1      |                |        |   |
| Urinary system                              | Stomach cramps                        | Lf     | If                                          | Or                                    | 4      |                |        |   |
|                                             | Diarrhoea                             | Lf     | If                                          | Or                                    | 2      |                |        |   |
| Digestive system                            | Stomach cramps                        | Lf     | Dc                                          | Or                                    | 1      |                |        |   |
|                                             | Stomach infection                     | Lf     | If                                          | Or                                    | 1      |                |        |   |
| Infections and infestations                 | Fleas                                 | Lf     | Dc, If                                      | Bt                                    | 2      |                |        |   |
|                                             | Chickenpox                            | Lf     | Dc                                          | Bt                                    | 1      |                |        |   |
| Pregnancy, birth and puerperium             | Abortive                              | Lf     | If                                          | Or                                    | 1      |                |        |   |
|                                             | Postpartum                            | Ep     | Dc                                          | Or                                    | 1      |                |        |   |
| Reproductive system and reproductive health | Menstruation disorders                | Ep, Lf | Dc                                          | Or                                    | 2      |                |        |   |
|                                             | Kidney disorders, emollient, diuretic | Lf     | If                                          | Or                                    | 1      |                |        |   |
| Urinary system                              | Stomach cramps                        | Lf     | If                                          | Or                                    | 4      |                |        |   |
|                                             | Diarrhoea                             | Lf     | If                                          | Or                                    | 2      |                |        |   |
| Digestive system                            | Stomach cramps                        | Lf     | Dc                                          | Or                                    | 1      |                |        |   |
|                                             | Stomach infection                     | Lf     | If                                          | Or                                    | 1      |                |        |   |
| Infections and infestations                 | Fleas                                 | Lf     | Dc, If                                      | Bt                                    | 2      |                |        |   |
|                                             | Chickenpox                            | Lf     | Dc                                          | Bt                                    | 1      |                |        |   |
| Pregnancy, birth and puerperium             | Abortive                              | Lf     | If                                          | Or                                    | 1      |                |        |   |
|                                             | Postpartum                            | Ep     | Dc                                          | Or                                    | 1      |                |        |   |
| Reproductive system and reproductive health | Menstruation disorders                | Ep, Lf | Dc                                          | Or                                    | 2      |                |        |   |
|                                             | Kidney disorders, emollient, diuretic | Lf     | If                                          | Or                                    | 1      |                |        |   |
| Urinary system                              | Stomach cramps                        | Lf     | If                                          | Or                                    | 4      |                |        |   |
|                                             | Diarrhoea                             | Lf     | If                                          | Or                                    | 2      |                |        |   |
| Digestive system                            | Stomach cramps                        | Lf     | Dc                                          | Or                                    | 1      |                |        |   |
|                                             | Stomach infection                     | Lf     | If                                          | Or                                    | 1      |                |        |   |
| Infections and infestations                 | Fleas                                 | Lf     | Dc, If                                      | Bt                                    | 2      |                |        |   |
|                                             | Chickenpox                            | Lf     | Dc                                          | Bt                                    | 1      |                |        |   |
| Pregnancy, birth and puerperium             | Abortive                              | Lf     | If                                          | Or                                    | 1      |                |        |   |
|                                             | Postpartum                            | Ep     | Dc                                          | Or                                    | 1      |                |        |   |
| Reproductive system and reproductive health | Menstruation disorders                | Ep, Lf | Dc                                          | Or                                    | 2      |                |        |   |
|                                             | Kidney disorders, emollient, diuretic | Lf     | If                                          | Or                                    | 1      |                |        |   |
| Urinary system                              | Stomach cramps                        | Lf     | If                                          | Or                                    | 4      |                |        |   |
|                                             | Diarrhoea                             | Lf     | If                                          | Or                                    | 2      |                |        |   |
| Digestive system                            | Stomach cramps                        | Lf     | Dc                                          | Or                                    | 1      |                |        |   |
|                                             | Stomach infection                     | Lf     | If                                          | Or                                    | 1      |                |        |   |
| Infections and infestations                 | Fleas                                 | Lf     | Dc, If                                      | Bt                                    | 2      |                |        |   |
|                                             | Chickenpox                            | Lf     | Dc                                          | Bt                                    | 1      |                |        |   |
| Pregnancy, birth and puerperium             | Abortive                              | Lf     | If                                          | Or                                    | 1      |                |        |   |
|                                             | Postpartum                            | Ep     | Dc                                          | Or                                    | 1      |                |        |   |
| Reproductive system and reproductive health | Menstruation disorders                | Ep, Lf | Dc                                          | Or                                    | 2      |                |        |   |
|                                             | Kidney disorders, emollient, diuretic | Lf     | If                                          | Or                                    | 1      |                |        |   |
| Urinary system                              | Stomach cramps                        | Lf     | If                                          | Or                                    | 4      |                |        |   |
|                                             | Diarrhoea                             | Lf     | If                                          | Or                                    | 2      |                |        |   |
| Digestive system                            | Stomach cramps                        | Lf     | Dc                                          | Or                                    | 1      |                |        |   |
|                                             | Stomach infection                     | Lf     | If                                          | Or                                    | 1      |                |        |   |
| Infections and infestations                 |                                       |        |                                             |                                       |        |                |        |   |



|                                                   |              |            |                                             |                                       |            |                |        |    |
|---------------------------------------------------|--------------|------------|---------------------------------------------|---------------------------------------|------------|----------------|--------|----|
| <i>Bidens pilosa</i> L. (FC737)                   | Cadillo      | Wild       | Skin and subcutaneous tissue                | Burns                                 | Lf         | Fs             | Pl     | 1  |
|                                                   |              |            | Digestive system                            | Diarrhoea                             | Ep         | If             | Bt     | 1  |
|                                                   |              |            | Skin and subcutaneous tissue                | Wounds, healing                       | Lf         | Dc             | Bt     | 1  |
|                                                   |              |            | Other uses                                  | Hair loss                             | Ep, Lf     | Dc, MI         | Bt, Pl | 2  |
|                                                   |              |            | Endocrine system                            | Diabetes                              | Bk         | Dc             | Or     | 1  |
|                                                   |              |            |                                             | Prostate disorders                    | Bk, Ep, Lf | Dc, If         | Or     | 6  |
| <i>Calendula officinalis</i> L. (FC300)           | Flor del sol | Cultivated | Urinary system                              | Kidney disorders, emollient, diuretic | Ep, Lf     | Dc, If         | Or     | 5  |
|                                                   |              |            | Cultural diseases and disorders             | Tijte                                 | Fr         | Wm             | Pl     | 1  |
|                                                   |              |            | General ailments with unspecific symptoms   | Fever                                 | Lf, Ro     | Dc, Fs, If, MI | Bt, Or | 5  |
|                                                   |              |            | Infections and infestations                 | Chickenpox                            | Lf         | Dc             | Bt     | 1  |
| <i>Cichorium intybus</i> L. (FC733)               | Achicoria    | Wild       | Skin and subcutaneous tissue                | Wounds, healing                       | Lf         | Dc, If         | Bt, Pl | 2  |
|                                                   |              |            | Digestive system                            | Diarrhoea                             | Lf         | If             | Or     | 2  |
|                                                   |              |            |                                             | Hepatitis                             | Lf, Ro     | If             | Or     | 4  |
|                                                   |              |            |                                             | Liver disorders                       | Ro         | If             | Or     | 1  |
|                                                   |              |            | Urinary system                              | Kidney disorders, emollient, diuretic | Lf, Ro     | Dc, If         | Or     | 2  |
| <i>Conyza bonariensis</i> (L.) Cronquist (FC751)  | Lluilanza    | Wild       | Cultural diseases and disorders             | Susto, espanto                        | Lf         | If             | Bt     | 1  |
| <i>Cynara scolymus</i> L. (FC735)                 | Alcachofa    | Cultivated | Blood and cardio-vascular system            | Anemia                                | Fr         | Dc             | Or     | 1  |
| <i>Erysimum × cheiri</i> (L.) Crantz ()           | Lalanqui     | Wild       | Sensory system                              | Visual disorders                      | Lf         | Dc             | Bt     |    |
| <i>Gamochaeta americana</i> (Mill.) Wedd. (FC749) | Lechuguilla  | Wild       | Digestive system                            | Hepatitis                             | Lf         | Fs             | Or     | 1  |
|                                                   |              |            | Nervous system and mental health            | Insomnia                              | St         | If             | Or     | 1  |
|                                                   |              |            | Sensory system                              | Visual disorders                      | Lf         | Fs, If         | Pl     | 2  |
|                                                   |              |            | Pregnancy, birth and puerperium             | Breastfeeding                         | Lf         | Dc, If         | Or     | 2  |
|                                                   |              |            | Skin and subcutaneous tissue                | Burns                                 | Lf         | If             | Pl     | 1  |
| <i>Lactuca sativa</i> L. (FC324)                  | Lechuga      | Cultivated | Blood and cardio-vascular system            | High pressure                         | Lf         | Fs             | Or     | 2  |
|                                                   |              |            | Endocrine system                            | Diabetes                              | Bd         | If             | Or     | 1  |
|                                                   |              |            | Metabolic system and nutrition              | Weight loss                           | Lf         | Fs             | Or     | 1  |
|                                                   |              |            | Pregnancy, birth and puerperium             | Breastfeeding                         | Ap, Lf     | Dc, Jc         | Or     | 3  |
|                                                   |              |            | Nervous system and mental health            | Insomnia                              | Bd, Lf, St | Dc, If         | Or     | 11 |
|                                                   |              |            | Blood and cardio-vascular system            | High pressure                         | Lf         | If             | Or     | 2  |
|                                                   |              |            | Digestive system                            | Stomach pain                          | Ep         | Dc, If         | Or     | 5  |
|                                                   |              |            |                                             | Stomach cramps                        | Ep, Lf     | Dc, If         | Or     | 79 |
|                                                   |              |            |                                             | Laxative                              | Lf         | If             | Or     | 1  |
|                                                   |              |            |                                             | Diarrhoea                             | Ep, Lf     | Dc, If         | Or     | 7  |
|                                                   |              |            |                                             | Stomach infection                     | Ep, Lf     | Dc, If         | Or     | 5  |
| <i>Matricaria recutita</i> L. (FC752)             | Manzanilla   | Cultivated | General ailments with unspecific symptoms   | Fever                                 | Ep, Lf     | If             | Or     | 3  |
|                                                   |              |            | Nervous system and mental health            | Insomnia                              | Ep, Lf     | Dc, If         | Or     | 19 |
|                                                   |              |            |                                             | Sadness                               | Ep         | If             | Or     | 1  |
|                                                   |              |            | Other uses                                  | Cancer                                | Ep         | Dc             | Or     | 1  |
|                                                   |              |            | Pregnancy, birth and puerperium             | Birth                                 | Ep, Lf     | If             | Or     | 20 |
|                                                   |              |            | Reproductive system and reproductive health | Menstruation disorders                | Ep, Lf     | If             | Or     | 4  |

|                                                                                          |                                  |            |  |  |  |                                             |                        |            |                |                |     |
|------------------------------------------------------------------------------------------|----------------------------------|------------|--|--|--|---------------------------------------------|------------------------|------------|----------------|----------------|-----|
|                                                                                          |                                  |            |  |  |  | Respiratory system                          | Menopause              | Ep, Lf     | If             | Or             | 2   |
|                                                                                          |                                  |            |  |  |  |                                             | Flu                    | Ep, Lf     | Dc, If         | Or             | 5   |
|                                                                                          |                                  |            |  |  |  |                                             | Visual disorders       | Ep, Fl, Lf | Dc, Fs, If     | Bt, Ew, Kn     | 124 |
|                                                                                          |                                  |            |  |  |  | Sensory system                              | Hearing disorders      | Fl         | Dc             | Bt             | 1   |
|                                                                                          |                                  |            |  |  |  | Skin and subcutaneous tissue                | Acne                   | Ep, Lf     | Dc, Fs, If     | Bt, Kn, Or, Vp | 28  |
|                                                                                          |                                  |            |  |  |  |                                             | Wounds, healing        | Lf         | Dc             | Bt             | 3   |
|                                                                                          |                                  |            |  |  |  | Urinary system                              | Prostate disorders     | Ep         | Dc             | Or             | 1   |
|                                                                                          |                                  |            |  |  |  | Cultural diseases and disorders             | Susto, espanto         | Lf         | Fs             | Bt             | 1   |
|                                                                                          |                                  |            |  |  |  | Reproductive system and reproductive health | Menopause              | Lf         | If             | Or             | 1   |
|                                                                                          |                                  |            |  |  |  | Nervous system and mental health            | Sadness                | Lf         | MI             | Or             | 1   |
| <i>Monactis jelskii</i> Hieron. (FC755)                                                  | Nispasiana                       | Wild       |  |  |  | Skin and subcutaneous tissue                | Feet fungus            | Lf         | Dc             | Bt             | 1   |
| <i>Ophryosporus peruvianus</i> R.M. King & H. Rob (FC758)                                | Rumusauana                       | Wild       |  |  |  | Cultural diseases and disorders             | Aire, malaire          | Lf         | Fs, If         | Bt             | 3   |
|                                                                                          |                                  |            |  |  |  |                                             | Susto, espanto         | Lf         | If             | Bt             | 3   |
| <i>Pluchea sagittalis</i> Less.                                                          | Cuatro esquinas                  | Cultivated |  |  |  | Nervous system and mental health            | Epilepsy               | Lf         | If             | Or             | 1   |
| <i>Porophyllum ruderale</i> (Jacq.) Cass. (FC760)                                        | Hierba del gallinazo, shucarruda | Wild       |  |  |  | Cultural diseases and disorders             | Aire, malaire          | Lf         | If             | Kn             | 1   |
|                                                                                          |                                  |            |  |  |  |                                             |                        | Lf         | If             | Bt             | 3   |
| <i>Schizotrichia jelskii</i> (Hieron.) "Strother ex Loockerman, B.L.Turner & R.K.Jansen" | Añasquero                        | Wild       |  |  |  | Cultural diseases and disorders             |                        | Lf         | If             | Kn             | 1   |
| <i>Smallanthus glabratus</i> (DC). H. Rob. (FC764)                                       | Yacónsacha                       | Wild       |  |  |  | Cultural diseases and disorders             | Pulsario               | Lf         | If             | Or             | 2   |
|                                                                                          |                                  |            |  |  |  |                                             | Susto, espanto         | Ep, Lf     | If             | Or, Pl         | 2   |
| <i>Smallanthus sonchifolius</i> (Poepp.) H. Rob. (FC763)                                 | Yacón                            | Cultivated |  |  |  | Blood and cardio-vascular system            | High pressure          | Ro         | If             | Or             | 1   |
|                                                                                          |                                  |            |  |  |  | Reproductive system and reproductive health | Fertility              | Ro         | If             | Or             | 1   |
| <i>Sonchus asper</i> (L.) Hill (FC739)                                                   | Cashacerraja                     | Wild       |  |  |  | Endocrine system                            | Diabetes               | Ro         | Dc, Fs, If, Jc | Or             | 20  |
|                                                                                          |                                  |            |  |  |  | Pregnancy, birth and puerperium             | Breastfeeding          | Ep         | Fs             | Wh             | 1   |
|                                                                                          |                                  |            |  |  |  | Respiratory system                          | Cough                  | Lf         | If             | Or             | 1   |
|                                                                                          |                                  |            |  |  |  | Reproductive system and reproductive health | Menstruation disorders | Lf         | If, MI         | Or             | 2   |
| <i>Sonchus oleraceus</i> (L.) L. (FC740)                                                 | Cerraja                          | Wild       |  |  |  | Pregnancy, birth and puerperium             | Postpartum             | Lf         | If             | Bt             | 1   |
|                                                                                          |                                  |            |  |  |  | General ailments with unspecific symptoms   | Fever                  | Lf         | If             | Bt, Or         | 2   |
| <i>Stevia rebaudiana</i> (Bertoni) Bertoni                                               | Estevia                          | Cultivated |  |  |  | Endocrine system                            | Diabetes               | Lf         | Dc, If         | Or             | 16  |
|                                                                                          |                                  |            |  |  |  | Digestive system                            | Stomach cramps         | Lf         | If             | Or             | 1   |
|                                                                                          |                                  |            |  |  |  | Cultural diseases and disorders             | Aire, malaire          | Lf         | If             | Bt             | 2   |
|                                                                                          |                                  |            |  |  |  |                                             | Susto, espanto         | Lf         | If             | Bt             | 1   |
| <i>Tagetes elliptica</i> Sm. (FC754)                                                     | Marisaccha, maríasacha           | Cultivated |  |  |  |                                             | Tacsho                 | Lf         | Fs             | Bt             | 1   |
|                                                                                          |                                  |            |  |  |  |                                             | Pulsario               | Lf         | MI             | Pl             | 1   |
|                                                                                          |                                  |            |  |  |  | General ailments with unspecific symptoms   | Fever                  | Lf         | Fm             | Kn             | 1   |
|                                                                                          |                                  |            |  |  |  | Pregnancy, birth and puerperium             | Postpartum             | Lf         | If             | Or             | 1   |
|                                                                                          |                                  |            |  |  |  | Ritual and magic uses                       | Negative vibes         | Lf         | If             | Bt             | 1   |
|                                                                                          |                                  |            |  |  |  |                                             | Curse                  | Lf         | MI             | Bt             | 1   |
|                                                                                          |                                  |            |  |  |  |                                             | Bring good luck        | Lf         | Dc             | Bt             | 1   |
|                                                                                          |                                  |            |  |  |  | Sensory system                              | Visual disorders       | Lf         | If             | Bt             | 1   |
|                                                                                          |                                  |            |  |  |  | Cultural diseases and disorders             | Susto, espanto         | Fl, Lf     | Dc, Fs, If     | Bt, Kn         | 3   |
|                                                                                          |                                  |            |  |  |  |                                             | Tacsho                 | Ep, Fl, Lf | Fs, If         | Bt             | 4   |
| <i>Tagetes erecta</i> L. (FC757)                                                         | Ayarrosa, rosa de los muertos    | Wild       |  |  |  | Infections and infestations                 | UTA, leishmaniasis     | Lf         | MI             | Pl             | 1   |
|                                                                                          |                                  |            |  |  |  | Digestive system                            | Hepatitis              | Fl         | If             | Or             | 1   |
|                                                                                          |                                  |            |  |  |  | Ritual and magic uses                       | Bring good luck        | Fl         | Fs             | Bt             | 1   |

|                                                    |                                       |            |                                                      |                                       |                |                                           |                  |                |    |    |    |
|----------------------------------------------------|---------------------------------------|------------|------------------------------------------------------|---------------------------------------|----------------|-------------------------------------------|------------------|----------------|----|----|----|
| Tagetes filifolia Lag. (FC736)                     | Anís de sierra                        | Wild       | Pregnancy, birth and puerperium                      | Birth                                 | Ep, Lf         | If                                        | Or               | 13             |    |    |    |
|                                                    |                                       |            | Dental health                                        | Toothache                             | Lf, Sd         | Fs, If                                    | Bt, Or           | 2              |    |    |    |
|                                                    |                                       |            | Blood and cardio-vascular system                     | High pressure                         | Ep, Lf         | If                                        | Or               | 2              |    |    |    |
|                                                    |                                       |            |                                                      | Stomach cramps                        | Ep, Lf         | Dc, If                                    | Or               | 44             |    |    |    |
|                                                    |                                       |            | Digestive system                                     | Diarrhoea                             | Lf             | If                                        | Or               | 4              |    |    |    |
|                                                    |                                       |            |                                                      | Stomach pain                          | Ep, Lf         | If                                        | Or               | 5              |    |    |    |
|                                                    |                                       |            |                                                      | Hepatitis                             | Ep             | Dc                                        | Or               | 1              |    |    |    |
|                                                    |                                       |            |                                                      | Stomach infection                     | Ep, Lf         | Dc, If                                    | Or               | 2              |    |    |    |
|                                                    |                                       |            | Reproductive system and reproductive health          | Menstruation disorders                | Lf             | If                                        | Or               | 1              |    |    |    |
|                                                    |                                       |            | Sensory system                                       | Visual disorders                      | Lf             | Dc                                        | Or               | 1              |    |    |    |
| Tanacetum parthenium (L.) Sch. Bip. (FC738)        | Callimanzanilla                       | Wild       | Pregnancy, birth and puerperium                      | Postpartum                            | Lf             | If                                        | Bt               | 1              |    |    |    |
|                                                    |                                       |            | General ailments with unspecific symptoms            | Fever                                 | Lf             | Dc, If                                    | Bt               | 9              |    |    |    |
|                                                    |                                       |            |                                                      | General malaise                       | Ep             | If                                        | Bt               | 1              |    |    |    |
|                                                    |                                       |            | Respiratory system                                   | Flu                                   | Ep, Lf         | Dc, Fm, If                                | Bt, Kn, Or       | 11             |    |    |    |
|                                                    |                                       |            | Digestive system                                     | Cough                                 | Lf             | Fm                                        | Or               | 1              |    |    |    |
|                                                    |                                       |            |                                                      | Hepatitis                             | Lf             | If                                        | Or               | 1              |    |    |    |
|                                                    |                                       |            | Pregnancy, birth and puerperium                      | Abortive                              | Lf             | Dc                                        | Or               | 1              |    |    |    |
|                                                    |                                       |            | Taraxacum officinale (L.) Weber ex F.H. Wigg (FC745) | Diente de león, amargón               | Wild           | Other uses                                | Hair loss        | Lf             | If | Bt | 1  |
|                                                    |                                       |            |                                                      |                                       |                | General ailments with unspecific symptoms | Fever            | Ep             | Dc | Or | 2  |
|                                                    |                                       |            |                                                      |                                       |                |                                           | Digestive system | Gastric ulcers | Lf | If | Or |
| General ailments with unspecific symptoms          | General malaise                       | Lf         |                                                      |                                       |                | Fs                                        | Bt               | 1              |    |    |    |
|                                                    | Kidney disorders, emollient, diuretic | Lf         |                                                      |                                       |                | Dc                                        | Or               | 1              |    |    |    |
| Tessaria integrifolia Ruiz & Pav. (FC756)          | Pájaro bobo                           | Wild       | Urinary system                                       | Kidney disorders, emollient, diuretic | Lf             | Dc                                        | Or               | 1              |    |    |    |
|                                                    |                                       |            | Digestive system                                     | Diarrhoea                             | Lf             | If                                        | Or               | 1              |    |    |    |
| Vernonanthura patens (Kunth) H. Rob. (FC742)       | Cosomo, cosmo                         | Wild       | Muscular-skeletal system                             | Joint sprains                         | Bk             | Fs                                        | Kn               | 1              |    |    |    |
| Vernonia scorpioides (Lam.) Pers. (FC747)          | Gulgul                                | Wild       | Skin and subcutaneous tissue                         | UTA, leishmaniasis                    | Lf             | Fs                                        | Pl               | 1              |    |    |    |
| Zinnia peruviana (L.) L (no voucher specimen)      | Chinita y cholito                     | Cultivated | Reproductive system and reproductive health          | Fertility                             | Fr, Lf         | If                                        | Or               | 4              |    |    |    |
| Convolvulaceae                                     |                                       |            |                                                      |                                       |                |                                           |                  |                |    |    |    |
| Ipomoea alba L. (FC765)                            | Aciuca blanca                         | Wild       | Sensory system                                       | Visual disorders                      | Ap             | Dc                                        | Bt               | 1              |    |    |    |
| Ipomoea batatas (L.) Lam. (FC766)                  | Camote                                | Cultivated | Pregnancy, birth and puerperium                      | Breastfeeding                         | Bd, Lf, Lx. Ro | Dc, Fs, If                                | Or, Pl           | 9              |    |    |    |
|                                                    |                                       |            | Skin and subcutaneous tissue                         | Feet fungus                           | Ro             | Dc                                        | Bt               | 1              |    |    |    |
| Crassulaceae                                       |                                       |            |                                                      |                                       |                |                                           |                  |                |    |    |    |
| Kalanchoe pinnata (Lam.) Pers. (FC767)             | Hoja del aire, pimpinela              | Wild       | Infections and infestations                          | Malaria                               | Lf             | If                                        | Or               | 1              |    |    |    |
| Cucurbitaceae                                      |                                       |            |                                                      |                                       |                |                                           |                  |                |    |    |    |
| Citrullus lanatus (Thunb.) Matsum. & Nakai (FC772) | Sandía                                | Cultivated | Urinary system                                       | Kidney disorders, emollient, diuretic | Fr             | Fs                                        | Or               | 2              |    |    |    |
|                                                    |                                       |            | General ailments with unspecific symptoms            | Headache                              | Fr             | Fs                                        | Or               | 1              |    |    |    |
| Cucumis melo L. (FC770)                            | Melón                                 | Cultivated | Urinary system                                       | Kidney disorders, emollient, diuretic | Fr             | Fs                                        | Or               | 1              |    |    |    |
| Cucumis sativus L. (FC771)                         | Pepinillo                             | Cultivated | Blood and cardio-vascular system                     | High pressure                         | Fr             | Fs, Ml                                    | Or               | 3              |    |    |    |
|                                                    |                                       |            | Skin and subcutaneous tissue                         | Hemorrhoids                           | Fr             | Fs, Ml                                    | Kn, Or           | 2              |    |    |    |
|                                                    |                                       |            |                                                      | Acne                                  | Fr             | Fs                                        | Bt, Kn, Or, Pl   | 5              |    |    |    |
|                                                    |                                       |            | Burns                                                | Fr                                    | Fs             | Bt, Pl                                    | 3                |                |    |    |    |

|                                                   |                                   |            |                                             |                                   |            |                                        |                                   |                  |                                             |                        |        |    |    |   |
|---------------------------------------------------|-----------------------------------|------------|---------------------------------------------|-----------------------------------|------------|----------------------------------------|-----------------------------------|------------------|---------------------------------------------|------------------------|--------|----|----|---|
| <i>Cucurbita ficifolia</i> Bouché<br>(FC769)      | Chiclayo, calabaza                | Cultivated | Digestive system                            | Diarrhoea                         | Fr         | Fs, If                                 | Or                                | 3                |                                             |                        |        |    |    |   |
|                                                   |                                   |            | Pregnancy, birth and puerperium             | Birth                             | Fr         | Fs                                     | Or                                | 1                |                                             |                        |        |    |    |   |
|                                                   |                                   |            | Endocrine system                            | Diabetes                          | Fr         | Fs                                     | Or                                | 1                |                                             |                        |        |    |    |   |
|                                                   |                                   |            | Metabolic system and nutrition              | Weight loss                       | Fr         | Fs, If, Ml                             | Or                                | 6                |                                             |                        |        |    |    |   |
|                                                   |                                   |            | Sensory system                              | Visual disorders                  | Fr         | Fs                                     | Ew                                | 1                |                                             |                        |        |    |    |   |
|                                                   |                                   |            |                                             | Tijte                             | Lf         | Wm                                     | Bt                                | 1                |                                             |                        |        |    |    |   |
|                                                   |                                   |            | Cultural diseases and disorders             | Antimonia, gentil, viejo, antiguo | Sd         | Fs                                     | Bt                                | 1                |                                             |                        |        |    |    |   |
|                                                   |                                   |            |                                             | Intestinal parasites              | Sd         | Dc, Ml                                 | Or                                | 2                |                                             |                        |        |    |    |   |
|                                                   |                                   |            | Digestive system                            | Laxative                          | Sd         | Wm                                     | Or                                | 1                |                                             |                        |        |    |    |   |
|                                                   |                                   |            | General ailments with unspecific symptoms   | Fever                             | Lf         | Dc, Fs, If                             | Bt                                | 4                |                                             |                        |        |    |    |   |
|                                                   |                                   |            | Reproductive system and reproductive health | Fertility                         | Lf         | If                                     | Or                                | 1                |                                             |                        |        |    |    |   |
|                                                   |                                   |            | Urinary system                              | Prostate disorders                | Bd         | If                                     | Or                                | 1                |                                             |                        |        |    |    |   |
|                                                   |                                   |            | Pregnancy, birth and puerperium             | Postpartum                        | Lf         | If                                     | Bt                                | 1                |                                             |                        |        |    |    |   |
|                                                   |                                   |            |                                             | Breastfeeding                     | Sd         | Wm                                     | Or                                | 1                |                                             |                        |        |    |    |   |
|                                                   |                                   |            | <i>Cucurbita maxima</i> Duchesne<br>(FC773) | Zapallo, zapayo                   | Cultivated | Cultural diseases and disorders        | Antimonia, gentil, viejo, antiguo | Sd               | Fs                                          | Bt                     | 1      |    |    |   |
|                                                   | Fertility                         | Sd         |                                             |                                   |            | If                                     | Or                                | 1                |                                             |                        |        |    |    |   |
| Reproductive system and reproductive health       | Menstruation disorders            | Lf         |                                             |                                   |            | If                                     | Or                                | 1                |                                             |                        |        |    |    |   |
|                                                   | Intestinal parasites              | Sd, Lf     |                                             |                                   |            | Dc, Fs, If, Ml, Wm                     | Or                                | 32               |                                             |                        |        |    |    |   |
| Digestive system                                  | Laxative                          | Sd         |                                             |                                   |            | If, Ml                                 | Or, Pl                            | 5                |                                             |                        |        |    |    |   |
| Nervous system and mental health                  | Insomnia                          | Fr         |                                             |                                   |            | Fs                                     | Or                                | 1                |                                             |                        |        |    |    |   |
| Endocrine system                                  | Diabetes                          | Lf         |                                             |                                   |            | Dc                                     | Or                                | 1                |                                             |                        |        |    |    |   |
| Pregnancy, birth and puerperium                   | Abortive                          | Fr         |                                             |                                   |            | Dc                                     | Or                                | 1                |                                             |                        |        |    |    |   |
| Blood and cardio-vascular system                  | High pressure                     | Fr         |                                             |                                   |            | Jc                                     | Or                                | 1                |                                             |                        |        |    |    |   |
| Cultural diseases and disorders                   | Antimonia, gentil, viejo, antiguo | Sd         |                                             |                                   |            | Fs                                     | Bt                                | 1                |                                             |                        |        |    |    |   |
| <i>Cyclanthera pedata</i> (L.) Scharb.<br>(FC768) | Caigua, cayua                     | Cultivated |                                             |                                   |            | Endocrine system                       | Diabetes                          | Fr               | Ml                                          | Bt, Or, Pl             | 1      |    |    |   |
|                                                   |                                   |            |                                             |                                   |            |                                        | Hearing disorders                 | Lf               | Jc, Ml, Wm                                  | Or                     | 57     |    |    |   |
|                                                   |                                   |            |                                             |                                   |            | Sensory system                         | Visual disorders                  | Fr, Lf           | Fs, Ml                                      | Bt, Ew, Or             | 5      |    |    |   |
|                                                   |                                   |            |                                             |                                   |            | <i>Sicana odorifera</i> (Vell.) Naudin | Secana                            | Cultivated, wild | Reproductive system and reproductive health | Menstruation disorders | Fr     | Dc | Or | 1 |
|                                                   |                                   |            |                                             |                                   |            |                                        |                                   |                  |                                             | Menopause              | Fr, Lf | If | Or | 2 |
| Cupressaceae                                      |                                   |            |                                             |                                   |            |                                        |                                   |                  |                                             |                        |        |    |    |   |
| <i>Cupressus sempervirens</i> L.<br>(FC774)       | Ciprés                            | Cultivated | Respiratory system                          | Flu                               | Lf         | If                                     | Or                                | 1                |                                             |                        |        |    |    |   |
| Equisetaceae                                      |                                   |            |                                             |                                   |            |                                        |                                   |                  |                                             |                        |        |    |    |   |
| <i>Equisetum bogotense</i> Kunth<br>(FC775)       | Cola de caballo                   | Wild       |                                             | Stomach cramps                    | Lf, Ro     | Dc                                     | Or                                | 2                |                                             |                        |        |    |    |   |
|                                                   |                                   |            | Digestive system                            | Diarrhoea                         | Lf         | Dc                                     | Or                                | 1                |                                             |                        |        |    |    |   |
|                                                   |                                   |            | Dental health                               | Toothache                         | Ep         | Dc                                     | Gg                                | 1                |                                             |                        |        |    |    |   |
|                                                   |                                   |            | Other uses                                  | Cancer                            | Ep         | Dc                                     | Or                                | 1                |                                             |                        |        |    |    |   |
|                                                   |                                   |            | Reproductive system and reproductive health | Menstruation disorders            | Lf         | If                                     | Or                                | 1                |                                             |                        |        |    |    |   |
|                                                   |                                   |            |                                             | Vaginal infection                 | Ep         | If                                     | Or                                | 1                |                                             |                        |        |    |    |   |
|                                                   |                                   |            | Skin and subcutaneous tissue                | Wounds, healing                   | Ep         | Dc, If                                 | Bt                                | 3                |                                             |                        |        |    |    |   |
|                                                   |                                   |            | Urinary system                              | Kidney disorders,                 | Ep, Lf     | Dc, If                                 | Or                                | 117              |                                             |                        |        |    |    |   |

|  |  |  |  |                                                |                                                 |        |                       |               |    |
|--|--|--|--|------------------------------------------------|-------------------------------------------------|--------|-----------------------|---------------|----|
|  |  |  |  |                                                | emollient,<br>diuretic<br>Prostate<br>disorders | Ep, Lf | Dc, If                | Or            | 9  |
|  |  |  |  | <b>Erythroxylaceae</b>                         |                                                 |        |                       |               |    |
|  |  |  |  | Blood and cardio-vascular<br>system            | Low pressure                                    | Lf     | If                    | Or            | 2  |
|  |  |  |  |                                                | Antimonia,<br>gentil, viejo,<br>antiguo         | Lf, Sd | Dc, Dd,<br>Fs, If, MI | Bt, Kn,<br>Or | 10 |
|  |  |  |  | Cultural diseases and<br>disorders             | Susto, espanto                                  | Lf     | Dc, Fs,<br>If, MI     | Bt, Or,<br>Pl | 11 |
|  |  |  |  |                                                | Tacsho                                          | Lf     | Fs, If                | Bt, Or        | 2  |
|  |  |  |  |                                                | Pulsario                                        | Lf     | If                    | Or            | 1  |
|  |  |  |  | Dental health                                  | Toothache                                       | Lf     | Dc, Fs, f,<br>MI      | Bt, Or,<br>Kn | 14 |
|  |  |  |  |                                                | Stomach cramps                                  | Lf     | Dc, If                | Or            | 22 |
|  |  |  |  | Digestive system                               | Diarrhoea                                       | Lf     | Fs, If                | Or            | 4  |
|  |  |  |  |                                                | Stomach pain                                    | Lf     | If                    | Or            | 2  |
|  |  |  |  | Endocrine system                               | Diabetes                                        | Lf     | If                    | Or            | 1  |
|  |  |  |  |                                                | Kidney<br>disorders,<br>emollient,<br>diuretic  | Lf     | Dd                    | Or            | 1  |
|  |  |  |  | Urinary system                                 |                                                 |        |                       |               |    |
|  |  |  |  |                                                | UTA,<br>leishmaniasis                           | Lf     | If                    | Bt            | 1  |
|  |  |  |  | Infections and infestations                    | Malaria                                         | Lf     | If                    | Or            | 1  |
|  |  |  |  | Muscular-skeletal system                       | Rheumatism                                      | Lf     | MI                    | Pl            | 1  |
|  |  |  |  |                                                | Pregnancy, birth and<br>puerperium              | Lf     | Dc, Dd,<br>If         | Or            | 19 |
|  |  |  |  |                                                | Postpartum                                      | Lf     | If                    | Bt            | 1  |
|  |  |  |  | Reproductive system and<br>reproductive health | Menstruation<br>disorders                       | Lf     | If                    | Or            | 2  |
|  |  |  |  | <b>Euphorbiaceae</b>                           |                                                 |        |                       |               |    |
|  |  |  |  |                                                | UTA,<br>leishmaniasis                           | Lf     | If                    | Bt            | 1  |
|  |  |  |  |                                                | Malaria                                         | Lf     | If                    | Or            | 1  |
|  |  |  |  | Muscular-skeletal system                       | Rheumatism                                      | Lf     | MI                    | Pl            | 1  |
|  |  |  |  |                                                | Pregnancy, birth and<br>puerperium              | Lf     | Dc, Dd,<br>If         | Or            | 19 |
|  |  |  |  |                                                | Postpartum                                      | Lf     | If                    | Bt            | 1  |
|  |  |  |  | Reproductive system and<br>reproductive health | Menstruation<br>disorders                       | Lf     | If                    | Or            | 2  |
|  |  |  |  | <b>Euphorbiaceae</b>                           |                                                 |        |                       |               |    |
|  |  |  |  |                                                | UTA,<br>leishmaniasis                           | Lf     | If                    | Bt            | 1  |
|  |  |  |  |                                                | Malaria                                         | Lf     | If                    | Or            | 1  |
|  |  |  |  | Muscular-skeletal system                       | Rheumatism                                      | Lf     | MI                    | Pl            | 1  |
|  |  |  |  |                                                | Pregnancy, birth and<br>puerperium              | Lf     | Dc, Dd,<br>If         | Or            | 19 |
|  |  |  |  |                                                | Postpartum                                      | Lf     | If                    | Bt            | 1  |
|  |  |  |  | Reproductive system and<br>reproductive health | Menstruation<br>disorders                       | Lf     | If                    | Or            | 2  |
|  |  |  |  | <b>Euphorbiaceae</b>                           |                                                 |        |                       |               |    |
|  |  |  |  |                                                | UTA,<br>leishmaniasis                           | Lf     | If                    | Bt            | 1  |
|  |  |  |  |                                                | Malaria                                         | Lf     | If                    | Or            | 1  |
|  |  |  |  | Muscular-skeletal system                       | Rheumatism                                      | Lf     | MI                    | Pl            | 1  |
|  |  |  |  |                                                | Pregnancy, birth and<br>puerperium              | Lf     | Dc, Dd,<br>If         | Or            | 19 |
|  |  |  |  |                                                | Postpartum                                      | Lf     | If                    | Bt            | 1  |
|  |  |  |  | Reproductive system and<br>reproductive health | Menstruation<br>disorders                       | Lf     | If                    | Or            | 2  |
|  |  |  |  | <b>Euphorbiaceae</b>                           |                                                 |        |                       |               |    |
|  |  |  |  |                                                | UTA,<br>leishmaniasis                           | Lf     | If                    | Bt            | 1  |
|  |  |  |  |                                                | Malaria                                         | Lf     | If                    | Or            | 1  |
|  |  |  |  | Muscular-skeletal system                       | Rheumatism                                      | Lf     | MI                    | Pl            | 1  |
|  |  |  |  |                                                | Pregnancy, birth and<br>puerperium              | Lf     | Dc, Dd,<br>If         | Or            | 19 |
|  |  |  |  |                                                | Postpartum                                      | Lf     | If                    | Bt            | 1  |
|  |  |  |  | Reproductive system and<br>reproductive health | Menstruation<br>disorders                       | Lf     | If                    | Or            | 2  |
|  |  |  |  | <b>Euphorbiaceae</b>                           |                                                 |        |                       |               |    |
|  |  |  |  |                                                | UTA,<br>leishmaniasis                           | Lf     | If                    | Bt            | 1  |
|  |  |  |  |                                                | Malaria                                         | Lf     | If                    | Or            | 1  |
|  |  |  |  | Muscular-skeletal system                       | Rheumatism                                      | Lf     | MI                    | Pl            | 1  |
|  |  |  |  |                                                | Pregnancy, birth and<br>puerperium              | Lf     | Dc, Dd,<br>If         | Or            | 19 |
|  |  |  |  |                                                | Postpartum                                      | Lf     | If                    | Bt            | 1  |
|  |  |  |  | Reproductive system and<br>reproductive health | Menstruation<br>disorders                       | Lf     | If                    | Or            | 2  |
|  |  |  |  | <b>Euphorbiaceae</b>                           |                                                 |        |                       |               |    |
|  |  |  |  |                                                | UTA,<br>leishmaniasis                           | Lf     | If                    | Bt            | 1  |
|  |  |  |  |                                                | Malaria                                         | Lf     | If                    | Or            | 1  |
|  |  |  |  | Muscular-skeletal system                       | Rheumatism                                      | Lf     | MI                    | Pl            | 1  |
|  |  |  |  |                                                | Pregnancy, birth and<br>puerperium              | Lf     | Dc, Dd,<br>If         | Or            | 19 |
|  |  |  |  |                                                | Postpartum                                      | Lf     | If                    | Bt            | 1  |
|  |  |  |  | Reproductive system and<br>reproductive health | Menstruation<br>disorders                       | Lf     | If                    | Or            | 2  |
|  |  |  |  | <b>Euphorbiaceae</b>                           |                                                 |        |                       |               |    |
|  |  |  |  |                                                | UTA,<br>leishmaniasis                           | Lf     | If                    | Bt            | 1  |
|  |  |  |  |                                                | Malaria                                         | Lf     | If                    | Or            | 1  |
|  |  |  |  | Muscular-skeletal system                       | Rheumatism                                      | Lf     | MI                    | Pl            | 1  |
|  |  |  |  |                                                | Pregnancy, birth and<br>puerperium              | Lf     | Dc, Dd,<br>If         | Or            | 19 |
|  |  |  |  |                                                | Postpartum                                      | Lf     | If                    | Bt            | 1  |
|  |  |  |  | Reproductive system and<br>reproductive health | Menstruation<br>disorders                       | Lf     | If                    | Or            | 2  |
|  |  |  |  | <b>Euphorbiaceae</b>                           |                                                 |        |                       |               |    |
|  |  |  |  |                                                | UTA,<br>leishmaniasis                           | Lf     | If                    | Bt            | 1  |
|  |  |  |  |                                                | Malaria                                         | Lf     | If                    | Or            | 1  |
|  |  |  |  | Muscular-skeletal system                       | Rheumatism                                      | Lf     | MI                    | Pl            | 1  |
|  |  |  |  |                                                | Pregnancy, birth and<br>puerperium              | Lf     | Dc, Dd,<br>If         | Or            | 19 |
|  |  |  |  |                                                | Postpartum                                      | Lf     | If                    | Bt            | 1  |
|  |  |  |  | Reproductive system and<br>reproductive health | Menstruation<br>disorders                       | Lf     | If                    | Or            | 2  |
|  |  |  |  | <b>Euphorbiaceae</b>                           |                                                 |        |                       |               |    |
|  |  |  |  |                                                | UTA,<br>leishmaniasis                           | Lf     | If                    | Bt            | 1  |
|  |  |  |  |                                                | Malaria                                         | Lf     | If                    | Or            | 1  |
|  |  |  |  | Muscular-skeletal system                       | Rheumatism                                      | Lf     | MI                    | Pl            | 1  |
|  |  |  |  |                                                | Pregnancy, birth and<br>puerperium              | Lf     | Dc, Dd,<br>If         | Or            | 19 |
|  |  |  |  |                                                | Postpartum                                      | Lf     | If                    | Bt            | 1  |
|  |  |  |  | Reproductive system and<br>reproductive health | Menstruation<br>disorders                       | Lf     | If                    | Or            | 2  |
|  |  |  |  | <b>Euphorbiaceae</b>                           |                                                 |        |                       |               |    |
|  |  |  |  |                                                | UTA,<br>leishmaniasis                           | Lf     | If                    | Bt            | 1  |
|  |  |  |  |                                                | Malaria                                         | Lf     | If                    | Or            | 1  |
|  |  |  |  | Muscular-skeletal system                       | Rheumatism                                      | Lf     | MI                    | Pl            | 1  |
|  |  |  |  |                                                | Pregnancy, birth and<br>puerperium              | Lf     | Dc, Dd,<br>If         | Or            | 19 |
|  |  |  |  |                                                | Postpartum                                      | Lf     | If                    | Bt            | 1  |
|  |  |  |  | Reproductive system and<br>reproductive health | Menstruation<br>disorders                       | Lf     | If                    | Or            | 2  |
|  |  |  |  | <b>Euphorbiaceae</b>                           |                                                 |        |                       |               |    |
|  |  |  |  |                                                | UTA,<br>leishmaniasis                           | Lf     | If                    | Bt            | 1  |
|  |  |  |  |                                                | Malaria                                         | Lf     | If                    | Or            | 1  |
|  |  |  |  | Muscular-skeletal system                       | Rheumatism                                      | Lf     | MI                    | Pl            | 1  |
|  |  |  |  |                                                | Pregnancy, birth and<br>puerperium              | Lf     | Dc, Dd,<br>If         | Or            | 19 |
|  |  |  |  |                                                | Postpartum                                      | Lf     | If                    | Bt            | 1  |
|  |  |  |  | Reproductive system and<br>reproductive health | Menstruation<br>disorders                       | Lf     | If                    | Or            | 2  |
|  |  |  |  | <b>Euphorbiaceae</b>                           |                                                 |        |                       |               |    |
|  |  |  |  |                                                | UTA,<br>leishmaniasis                           | Lf     | If                    | Bt            | 1  |
|  |  |  |  |                                                | Malaria                                         | Lf     | If                    | Or            | 1  |
|  |  |  |  | Muscular-skeletal system                       | Rheumatism                                      | Lf     | MI                    | Pl            | 1  |
|  |  |  |  |                                                | Pregnancy, birth and<br>puerperium              | Lf     | Dc, Dd,<br>If         | Or            | 19 |
|  |  |  |  |                                                | Postpartum                                      | Lf     | If                    | Bt            | 1  |
|  |  |  |  | Reproductive system and<br>reproductive health | Menstruation<br>disorders                       | Lf     | If                    | Or            | 2  |
|  |  |  |  | <b>Euphorbiaceae</b>                           |                                                 |        |                       |               |    |
|  |  |  |  |                                                | UTA,<br>leishmaniasis                           | Lf     | If                    | Bt            | 1  |
|  |  |  |  |                                                | Malaria                                         | Lf     | If                    | Or            | 1  |
|  |  |  |  | Muscular-skeletal system                       | Rheumatism                                      | Lf     | MI                    | Pl            | 1  |
|  |  |  |  |                                                | Pregnancy, birth and<br>puerperium              | Lf     | Dc, Dd,<br>If         | Or            | 19 |
|  |  |  |  |                                                | Postpartum                                      | Lf     | If                    | Bt            | 1  |
|  |  |  |  | Reproductive system and<br>reproductive health | Menstruation<br>disorders                       | Lf     | If                    | Or            | 2  |
|  |  |  |  | <b>Euphorbiaceae</b>                           |                                                 |        |                       |               |    |
|  |  |  |  |                                                | UTA,<br>leishmaniasis                           | Lf     | If                    | Bt            | 1  |
|  |  |  |  |                                                | Malaria                                         | Lf     | If                    | Or            | 1  |
|  |  |  |  | Muscular-skeletal system                       | Rheumatism                                      | Lf     | MI                    | Pl            | 1  |
|  |  |  |  |                                                | Pregnancy, birth and<br>puerperium              | Lf     | Dc, Dd,<br>If         | Or            | 19 |
|  |  |  |  |                                                | Postpartum                                      | Lf     | If                    | Bt            | 1  |
|  |  |  |  | Reproductive system and<br>reproductive health | Menstruation<br>disorders                       | Lf     | If                    | Or            | 2  |
|  |  |  |  | <b>Euphorbiaceae</b>                           |                                                 |        |                       |               |    |
|  |  |  |  |                                                | UTA,<br>leishmaniasis                           | Lf     | If                    | Bt            | 1  |
|  |  |  |  |                                                | Malaria                                         | Lf     | If                    | Or            | 1  |
|  |  |  |  | Muscular-skeletal system                       | Rheumatism                                      | Lf     | MI                    | Pl            | 1  |
|  |  |  |  |                                                | Pregnancy, birth and<br>puerperium              | Lf     | Dc, Dd,<br>If         | Or            | 19 |
|  |  |  |  |                                                | Postpartum                                      | Lf     | If                    | Bt            | 1  |
|  |  |  |  | Reproductive system and<br>reproductive health | Menstruation<br>disorders                       | Lf     | If                    | Or            | 2  |
|  |  |  |  | <b>Euphorbiaceae</b>                           |                                                 |        |                       |               |    |
|  |  |  |  |                                                | UTA,<br>leishmaniasis                           | Lf     | If                    | Bt            | 1  |
|  |  |  |  |                                                | Malaria                                         | Lf     | If                    | Or            | 1  |
|  |  |  |  | Muscular-skeletal system                       | Rheumatism                                      | Lf     | MI                    | Pl            | 1  |
|  |  |  |  |                                                | Pregnancy, birth and<br>puerperium              | Lf     | Dc, Dd,<br>If         | Or            | 19 |
|  |  |  |  |                                                | Postpartum                                      | Lf     | If                    | Bt            | 1  |
|  |  |  |  | Reproductive system and<br>reproductive health | Menstruation<br>disorders                       | Lf     | If                    | Or            | 2  |
|  |  |  |  | <b>Euphorbiaceae</b>                           |                                                 |        |                       |               |    |
|  |  |  |  |                                                | UTA,<br>leishmaniasis                           | Lf     | If                    | Bt            | 1  |
|  |  |  |  |                                                | Malaria                                         | Lf     | If                    | Or            | 1  |
|  |  |  |  | Muscular-skeletal system                       | Rheumatism                                      | Lf     | MI                    | Pl            | 1  |
|  |  |  |  |                                                | Pregnancy, birth and<br>puerperium              | Lf     | Dc, Dd,<br>If         | Or            | 19 |
|  |  |  |  |                                                | Postpartum                                      | Lf     | If                    | Bt            | 1  |
|  |  |  |  | Reproductive system and<br>reproductive health | Menstruation<br>disorders                       | Lf     | If                    | Or            | 2  |
|  |  |  |  | <b>Euphorbiaceae</b>                           |                                                 |        |                       |               |    |
|  |  |  |  |                                                | UTA,<br>leishmaniasis                           | Lf     | If                    | Bt            | 1  |
|  |  |  |  |                                                | Malaria                                         | Lf     | If                    | Or            | 1  |
|  |  |  |  | Muscular-skeletal system                       | Rheumatism                                      | Lf     | MI                    | Pl            | 1  |
|  |  |  |  |                                                | Pregnancy, birth and<br>puerperium              | Lf     | Dc, Dd,<br>If         | Or            | 19 |
|  |  |  |  |                                                | Postpartum                                      | Lf     | If                    | Bt            | 1  |
|  |  |  |  | Reproductive system and<br>reproductive health | Menstruation<br>disorders                       | Lf     | If                    | Or            | 2  |
|  |  |  |  | <b>Euphorbiaceae</b>                           |                                                 |        |                       |               |    |
|  |  |  |  |                                                | UTA,<br>leishmaniasis                           | Lf     | If                    | Bt            | 1  |
|  |  |  |  |                                                | Malaria                                         | Lf     | If                    | Or            | 1  |
|  |  |  |  | Muscular-skeletal system                       | Rheumatism                                      | Lf     | MI                    | Pl            | 1  |
|  |  |  |  |                                                | Pregnancy, birth and<br>puerperium              | Lf     | Dc, Dd,<br>If         | Or            | 19 |
|  |  |  |  |                                                | Postpartum                                      | Lf     | If                    | Bt            | 1  |
|  |  |  |  | Reproductive system and<br>reproductive health | Menstruation<br>disorders                       | Lf     | If                    | Or            | 2  |
|  |  |  |  | <b>Euphorbiaceae</b>                           |                                                 |        |                       |               |    |
|  |  |  |  |                                                | UTA,<br>leishmaniasis                           | Lf     | If                    | Bt            | 1  |
|  |  |  |  |                                                | Malaria                                         | Lf     | If                    | Or            | 1  |
|  |  |  |  | Muscular-skeletal system                       | Rheumatism                                      | Lf     | MI                    | Pl            | 1  |
|  |  |  |  |                                                | Pregnancy, birth and<br>puerperium              | Lf     | Dc, Dd,<br>If         | Or            | 19 |
|  |  |  |  |                                                | Postpartum                                      | Lf     | If                    | Bt            | 1  |
|  |  |  |  | Reproductive system and<br>reproductive health | Menstruation<br>disorders                       | Lf     | If                    | Or            | 2  |
|  |  |  |  | <b>Euphorbiaceae</b>                           |                                                 |        |                       |               |    |
|  |  |  |  |                                                | UTA,<br>leishmaniasis                           | Lf     | If                    | Bt            | 1  |
|  |  |  |  |                                                | Malaria                                         | Lf     | If                    | Or            | 1  |
|  |  |  |  | Muscular-skeletal system                       | Rheumatism                                      | Lf     | MI                    | Pl            | 1  |
|  |  |  |  |                                                | Pregnancy, birth and<br>puerperium              | Lf     | Dc, Dd,<br>If         | Or            | 19 |
|  |  |  |  |                                                | Postpartum                                      | Lf     | If                    | Bt            | 1  |
|  |  |  |  | Reproductive system and<br>reproductive health | Menstruation<br>disorders                       | Lf     | If</                  |               |    |

|                                                                  |                            |            |                                             |                        |            |                |        |    |
|------------------------------------------------------------------|----------------------------|------------|---------------------------------------------|------------------------|------------|----------------|--------|----|
| <i>Ricinus communis</i> L. (FC778)                               | Higuerilla                 | Wild       | Digestive system                            | Stomach cramps         | Sd         | Oi             | Or     | 1  |
|                                                                  |                            |            |                                             | Liver disorders        | Sd         | Oi             | Pl     | 1  |
|                                                                  |                            |            |                                             | Laxative               | Sd         | Oi             | Or, Pl | 13 |
|                                                                  |                            |            | Skin and subcutaneous tissue                | Burns                  | Sd         | Oi             | Pl     | 1  |
| Gentianaceae                                                     |                            |            |                                             |                        |            |                |        |    |
| <i>Macrocarpaea revoluta</i> Gilg (FC782)                        | Tola                       | Wild       | Cultural diseases and disorders             | Tijte                  | Lx         | Fs             | Pl     | 1  |
|                                                                  |                            |            | Infections and infestations                 | UTA, leishmaniasis     | Sd         | Fs             | Pl     | 1  |
|                                                                  |                            |            | Digestive system                            | Diarrhoea              | Fr         | Fs             | Or     | 1  |
| Geraniaceae                                                      |                            |            |                                             |                        |            |                |        |    |
| <i>Geranium stuebelii</i> Hieron. (FC783)                        | Andacushma, tibshilla      | Wild       | Infections and infestations                 | UTA, leishmaniasis     | Lf         | If             | Pl     | 1  |
| <i>Pelargonium roseum</i> Willd. (FC784)                         | Geranio                    | Cultivated | Respiratory system                          | Cough                  | Lf         | If             | Gg     | 1  |
|                                                                  |                            |            | Digestive system                            | Diarrhoea              | Lf         | If             | Or     | 1  |
|                                                                  |                            |            | Skin and subcutaneous tissue                | Feet fungus            | Lf         | MI             | Pl     | 1  |
| Hypericaceae                                                     |                            |            |                                             |                        |            |                |        |    |
| <i>Hypericum laricifolium</i> Juss. (FC785)                      | Chinchango                 | Wild       | Cultural diseases and disorders             | Tijte                  | Ep         | If             | Bt     | 1  |
| Juglandaceae                                                     |                            |            |                                             |                        |            |                |        |    |
| <i>Juglans neotropica</i> Diels (FC786)                          | Nogal                      | Wild       | Respiratory system                          | Flu                    | Lf         | If             | Or     | 1  |
|                                                                  |                            |            | Urinary system                              | Prostate disorders     | Lf         | If             | Or     | 1  |
|                                                                  |                            |            | Other uses                                  | Hair loss              | Bd, Fr, Lf | Dc, Fm, Fs, If | Bt, Kn | 11 |
|                                                                  |                            |            | Pregnancy, birth and puerperium             | Postpartum             | Lf         | Dc             | Or     | 1  |
|                                                                  |                            |            |                                             | Abortive               | Lf         | If             | Bt     | 1  |
|                                                                  |                            |            | Endocrine system                            | Diabetes               | Lf         | If             | Or     | 3  |
| Lamiaceae                                                        |                            |            |                                             |                        |            |                |        |    |
| <i>Clinopodium sericeum</i> (C. Presl ex Benth) Govaerts (FC793) | Romero de monte, romerillo | Wild       | Other uses                                  | Hair loss              | Ep         | If             | Bt     | 1  |
| <i>Lepechinia meyenii</i> (Walp.) Epling (FC795)                 | Salvia blanca              | Wild       | Respiratory system                          | Flu                    | Fl, Lf     | Dc, If         | Or     | 3  |
|                                                                  |                            |            | Nervous system and mental health            | Insomnia               | Lf         | If             | Or     | 1  |
|                                                                  |                            |            | Blood and cardio-vascular system            | High pressure          | Ep, Lf     | If             | Or     | 5  |
|                                                                  |                            |            | Cultural diseases and disorders             | Susto, espanto         | Lf         | If             | Or     | 1  |
| <i>Melissa officinalis</i> L. (FC797)                            | Toronjil                   | Cultivated | Digestive system                            | Stomach cramps         | Lf         | If             | Or     | 2  |
|                                                                  |                            |            | Nervous system and mental health            | Sadness                | Lf         | If             | Or     | 10 |
|                                                                  |                            |            | Pregnancy, birth and puerperium             | Birth                  | Lf         | If             | Or     | 7  |
|                                                                  |                            |            | Reproductive system and reproductive health | Menopause              | Lf         | If             | Or     | 1  |
|                                                                  |                            |            | Blood and cardio-vascular system            | Low pressure           | Lf         | If             | Or     | 2  |
|                                                                  |                            |            | Dental health                               | Toothache              | Lf         | Fs             | Or     | 2  |
|                                                                  |                            |            |                                             | Intestinal parasites   | Lf         | Fs             | Or     | 1  |
|                                                                  |                            |            | Digestive system                            | Stomach cramps         | Lf         | If             | Or     | 18 |
|                                                                  |                            |            |                                             | Stomach pain           | Lf         | If             | Or     | 1  |
|                                                                  |                            |            |                                             | Diarrhoea              | Lf         | If             | Or     | 1  |
| <i>Mentha piperita</i> L. (FC789)                                | Menta                      | Cultivated | Infections and infestations                 | Insect bite            | Lf         | Fs             | Kn     | 1  |
|                                                                  |                            |            | Nervous system and mental health            | Insomnia               | Lf         | If             | Or     | 1  |
|                                                                  |                            |            | Pregnancy, birth and puerperium             | Birth                  | Lf         | If             | Or     | 2  |
|                                                                  |                            |            | Reproductive system and reproductive health | Menstruation disorders | Lf         | If             | Or     | 5  |
|                                                                  |                            |            |                                             | Menopause              | Lf         | If             | Or     | 1  |
| <i>Mentha spicata</i> L. (FC788)                                 | Hierbabuena                | Cultivated | Respiratory system                          | Flu                    | Lf         | Dc, If         | Or     | 6  |
|                                                                  |                            |            | Dental health                               | Toothache              | Lf         | Dc             | Gg     | 1  |

|                                                         |                             |      |                                                |                                                          |         |                          |                   |     |
|---------------------------------------------------------|-----------------------------|------|------------------------------------------------|----------------------------------------------------------|---------|--------------------------|-------------------|-----|
| <i>Minthostachys mollis</i> (Benth.)<br>Griseb. (FC791) | Poleo, ayamanchana,<br>muña | Wild |                                                | Intestinal<br>parasites                                  | Ep, Lf  | Dc, Fs,<br>If, MI        | Or, Vp            | 90  |
|                                                         |                             |      | Digestive system                               | Stomach cramps                                           | Lf      | If                       | Or                | 2   |
|                                                         |                             |      |                                                | Diarrhoea                                                | Lf      | If                       | Or                | 1   |
|                                                         |                             |      |                                                | Stomach<br>infection                                     | Lf      | If                       | Or                | 1   |
|                                                         |                             |      |                                                | Laxative                                                 | Lf      | Dc, If                   | Or                | 2   |
|                                                         |                             |      | General ailments with<br>unspecific symptoms   | Fever                                                    | Lf      | If                       | Or                | 1   |
|                                                         |                             |      |                                                | Headache                                                 | Lf      | Dc                       | Or                | 1   |
|                                                         |                             |      | Infections and infestations                    | Insect bite                                              | Ep, Lf  | If, MI                   | Kn, Or,<br>Pl     | 4   |
|                                                         |                             |      | Reproductive system and<br>reproductive health | Menstruation<br>disorders                                | Lf      | MI                       | Kn                | 1   |
|                                                         |                             |      | Skin and subcutaneous<br>tissue                | Wounds, healing                                          | Lf      | MI                       | Pl                | 1   |
|                                                         |                             |      |                                                | Swelling                                                 | Lf      | Dc                       | Or                | 1   |
|                                                         |                             |      | Dental health                                  | Toothache                                                | Lf      | MI                       | Or                | 1   |
|                                                         |                             |      |                                                | Tacsho                                                   | Ep, Lf  | Dc, Fs,<br>If, MI        | Bt, Kn,<br>Or, Vp | 218 |
|                                                         |                             |      | Cultural diseases and<br>disorders             | Susto, espanto                                           | Lf      | Dc, If                   | Bt, Or,<br>Pl     | 25  |
|                                                         |                             |      |                                                | Aire, malaire<br>Antimonia,<br>gentil, viejo,<br>antiguo | Ep, Lf  | Fs, If, MI               | Bt, Or            | 18  |
|                                                         |                             |      |                                                | Lice                                                     | Lf      | Fs                       | Bt                | 1   |
|                                                         |                             |      | Infections and infestations                    | Insect bite                                              | Ep      | MI                       | Bt                | 1   |
|                                                         |                             |      |                                                | Fleas                                                    | Lf      | Fs, MI                   | Kn, Pl            | 2   |
|                                                         |                             |      | Blood and cardio-vascular<br>system            |                                                          | Lf      | MI                       | Or                | 1   |
|                                                         |                             |      |                                                | Hemorrhoids                                              | Lf      | If                       | Or                | 1   |
|                                                         |                             |      | Other uses                                     | Cancer                                                   | Lf      | If                       | Or                | 2   |
|                                                         |                             |      |                                                | Curse                                                    | Lf      | If                       | Bt                | 1   |
|                                                         |                             |      | Muscular-skeletal system                       |                                                          |         | Fm, Fs,<br>If, MI,<br>Wm | Bt, Kn            | 4   |
|                                                         |                             |      |                                                | Rheumatism                                               | Lf      | If, MI,<br>Wm            | Bt, Kn            | 4   |
|                                                         |                             |      | Respiratory system                             | Flu                                                      | Lf      | If                       | Or                | 4   |
|                                                         |                             |      |                                                | Prostate<br>disorders                                    | Lf      | If                       | Or                | 1   |
|                                                         |                             |      | Urinary system                                 | Menstruation<br>disorders                                | Lf      | If                       | Or                | 1   |
|                                                         |                             |      |                                                | Insomnia                                                 | Lf      | If                       | Or                | 1   |
|                                                         |                             |      | Nervous system and<br>mental health            | Diabetes                                                 | Lf      | Dc, If                   | Or                | 2   |
|                                                         |                             |      |                                                | Susto, espanto                                           | Lf      | If                       | Or                | 1   |
|                                                         |                             |      | Endocrine system                               |                                                          | Lf      | If                       | Or                | 1   |
|                                                         |                             |      |                                                | Susto, espanto                                           | Lf      | If                       | Or                | 1   |
|                                                         |                             |      | Cultural diseases and<br>disorders             |                                                          | Lf      | If                       | Or                | 1   |
|                                                         |                             |      |                                                | Susto, espanto                                           | Lf      | If                       | Or                | 1   |
|                                                         |                             |      | Blood and cardio-vascular<br>system            |                                                          | Lf      | If                       | Or                | 1   |
|                                                         |                             |      |                                                | Susto, espanto                                           | Lf      | If                       | Or                | 1   |
|                                                         |                             |      | Anemia                                         |                                                          | Fr, Lf  | Fs, MI                   | Or                | 3   |
|                                                         |                             |      |                                                | Susto, espanto                                           | Lf      | If                       | Or                | 1   |
|                                                         |                             |      | Reproductive system and<br>reproductive health |                                                          | Lf      | If                       | Or                | 1   |
|                                                         |                             |      |                                                | Susto, espanto                                           | Lf      | If                       | Or                | 1   |
|                                                         |                             |      | Ritual and magic uses                          |                                                          | Lf      | If                       | Bt                | 1   |
|                                                         |                             |      |                                                | Negative vibes                                           | Lf      | If                       | Bt                | 1   |
|                                                         |                             |      | Pregnancy, birth and<br>puerperium             | Birth                                                    | Lf      | If                       | Or                | 6   |
|                                                         |                             |      |                                                | Abortive                                                 | Ep      | If                       | Or                | 1   |
|                                                         |                             |      | Digestive system                               | Intestinal<br>parasites                                  | Lf      | Fs, If                   | Or                | 2   |
|                                                         |                             |      |                                                | Stomach cramps                                           | Lf      | If                       | Or                | 3   |
|                                                         |                             |      | Reproductive system and<br>reproductive health |                                                          | Lf      | If                       | Or                | 1   |
|                                                         |                             |      |                                                | Stomach cramps                                           | Lf      | If                       | Or                | 1   |
|                                                         |                             |      | Digestive system                               |                                                          | Lf      | If                       | Or                | 1   |
|                                                         |                             |      |                                                | Stomach pain                                             | Lf      | If                       | Or                | 1   |
|                                                         |                             |      | Pregnancy, birth and<br>puerperium             | Abortive                                                 | Ep, Lf  | Dc, Fm,<br>If, MI        | Or                | 6   |
|                                                         |                             |      |                                                | Birth                                                    | Lf, Ro  | If                       | Or                | 6   |
|                                                         |                             |      | Cultural diseases and<br>disorders             | Aire, malaire                                            | Eep, Lf | Fm, If                   | Bt, Kn,<br>Vp     | 3   |
|                                                         |                             |      |                                                | Susto, espanto                                           | Lf      | Fm                       | Bt                | 1   |
|                                                         |                             |      | Tacsho                                         |                                                          | Lf      | Fm                       | Pl                | 1   |
|                                                         |                             |      |                                                | Tacsho                                                   | Lf      | Fm                       | Pl                | 1   |

|                                             |                  |            |                                             |                                   |            |                          |                |    |    |    |   |
|---------------------------------------------|------------------|------------|---------------------------------------------|-----------------------------------|------------|--------------------------|----------------|----|----|----|---|
| Salvia hispanica L. (FC432)                 | Chía             | Cultivated | Blood and cardio-vascular system            | Hemorrhoids                       | Lf         | Fm                       | Pl             | 1  |    |    |   |
|                                             |                  |            | Digestive system                            | Stomach cramps                    | Lf         | Fm                       | Or             | 1  |    |    |   |
|                                             |                  |            | Ritual and magic uses                       | Negative vibes                    | Lf         | Fm                       | Bt             | 1  |    |    |   |
|                                             |                  |            | Muscular-skeletal system                    | Rheumatism                        | Lf         | Fm                       | Bt             | 1  |    |    |   |
|                                             |                  |            | Other uses                                  | Hair loss                         | Ep, Lf     | Fm, If                   | Bt             | 9  |    |    |   |
|                                             |                  |            | Reproductive system and reproductive health | Fertility                         | Fr         | Fm                       | Or             | 1  |    |    |   |
|                                             |                  |            | Skin and subcutaneous tissue                | Feet fungus                       | Lf         | Fm                       | Bt             | 1  |    |    |   |
|                                             |                  |            | Metabolic system and nutrition              | Weight loss                       | Sd         | Dc, If, Jc               | Or             | 5  |    |    |   |
|                                             |                  |            | Other uses                                  | Cancer                            | Sd         | Jc                       | Or             | 1  |    |    |   |
|                                             |                  |            | Blood and cardio-vascular system            | Hemorrhoids                       | Sd         | Dc                       | Or             | 1  |    |    |   |
| Salvia macrophylla Benth. (FC794)           | Salvia azul      | Wild       | Digestive system                            | Diarrhoea                         | Lf         | If                       | Or             | 1  |    |    |   |
| Stachys arvensis (L.) L. (FC796)            | Subsacha         | Cultivated | Digestive system                            | Stomach cramps                    | Ep, Lf     | Dc, If                   | Or             | 28 |    |    |   |
|                                             |                  |            |                                             | Diarrhoea                         | Ep, Lf     | Dc, If                   | Or             | 15 |    |    |   |
|                                             |                  |            |                                             | Stomach pain                      | Lf         | If                       | Or             | 1  |    |    |   |
|                                             |                  |            |                                             | Stomach infection                 | Lf         | If                       | Or             | 2  |    |    |   |
|                                             |                  |            |                                             | Laxative                          | Lf         | If                       | Or             | 1  |    |    |   |
|                                             |                  |            | Pregnancy, birth and puerperium             | Birth                             | Lf         | If                       | Or             | 2  |    |    |   |
|                                             |                  |            | Skin and subcutaneous tissue                | Wounds, healing                   | Lf         | If                       | Or             | 1  |    |    |   |
|                                             |                  |            | Reproductive system and reproductive health | Menstruation disorders            | Lf         | If                       | Or             | 1  |    |    |   |
|                                             |                  |            | Thymus sp.                                  | Tomillo                           | Cultivated | Digestive system         | Diarrhoea      | Lf | If | Or | 1 |
|                                             |                  |            |                                             |                                   |            | Lauraceae                | Stomach cramps | Lf | If | Or | 1 |
| Dental health                               | Toothache        | Bk         |                                             |                                   |            |                          | MI             | Pl | 2  |    |   |
| Cinnamomum verum J. Presl (FC798)           | Canela           | Cultivated | Pregnancy, birth and puerperium             | Abortive                          | Bk         | If                       | Or             | 2  |    |    |   |
|                                             |                  |            | Metabolic system and nutrition              | Weight loss                       | Bk         | Dc, If                   | Or             | 2  |    |    |   |
|                                             |                  |            | Blood and cardio-vascular system            | Low pressure                      | Bk         | If                       | Or             | 1  |    |    |   |
|                                             |                  |            | Reproductive system and reproductive health | Menstruation disorders            | Bk         | If                       | Or             | 2  |    |    |   |
|                                             |                  |            | Digestive system                            | Diarrhoea                         | Bk         | If                       | Or             | 1  |    |    |   |
| Nectandra discolor (Kunth) Nees (FC799)     | Ishpingo, roble  | Wild       | Respiratory system                          | Flu                               | Lf         | If                       | Or             | 1  |    |    |   |
|                                             |                  |            | Cultural diseases and disorders             | Antimonia, gentil, viejo, antiguo | Lf         | Dc                       | Or             | 1  |    |    |   |
|                                             |                  |            | Cultural diseases and disorders             | Aire, malaire                     | Lf         | If                       | Kn             | 1  |    |    |   |
|                                             |                  |            | Digestive system                            | Diarrhoea                         | Sd         | Dc, If                   | Or             | 7  |    |    |   |
|                                             |                  |            |                                             | Stomach cramps                    | Sd         | If                       | Or             | 1  |    |    |   |
|                                             |                  |            |                                             | Liver disorders                   | Sd         | If                       | Or             | 1  |    |    |   |
|                                             |                  |            | Other uses                                  | Hair loss                         | Fr, Sd     | Rt                       | Bt, Kn, Pl     | 14 |    |    |   |
|                                             |                  |            | Persea americana Mill. (FC801)              | Palta                             | Cultivated | Other uses               | Cancer         | Sd | If | Or | 1 |
|                                             |                  |            |                                             |                                   |            | Dental health            | Toothache      | Lf | Fs | Bt | 1 |
|                                             |                  |            |                                             |                                   |            | Muscular-skeletal system | Joint sprains  | Lf | Fs | Pl | 1 |
| Blood and cardio-vascular system            | Hemorrhoids      | Sd         |                                             |                                   |            | If                       | Or             | 2  |    |    |   |
| Pregnancy, birth and puerperium             | Abortive         | Sd         |                                             |                                   |            | If                       | Or             | 1  |    |    |   |
| Reproductive system and reproductive health | Aphrodisiac      | Fr         |                                             |                                   |            | Fs                       | Or             | 1  |    |    |   |
| Sensory system                              | Visual disorders | Lf         |                                             |                                   |            | If                       | Pl             | 1  |    |    |   |
| Skin and subcutaneous tissue                | Feet fungus      | Sd         |                                             |                                   |            | Dc                       | Or             | 1  |    |    |   |
|                                             |                  |            |                                             |                                   |            |                          |                |    |    |    |   |
|                                             |                  |            |                                             |                                   |            |                          |                |    |    |    |   |



|                                                     |                                        |                  |                                             |                                       |        |            |            |    |
|-----------------------------------------------------|----------------------------------------|------------------|---------------------------------------------|---------------------------------------|--------|------------|------------|----|
|                                                     |                                        |                  | Urinary system                              | Kidney disorders, emollient, diuretic | Sd     | If         | Or         | 1  |
| <i>Persea subcordata</i> (Ruiz & Pav.) Nees (FC800) | Junjul, junjulí, paccacuna             | Wild             | Muscular-skeletal system                    | Joint sprains                         | Bk, Lf | Fs, Ml, Wm | Bt, Kn, Pl | 12 |
|                                                     |                                        |                  |                                             | Rheumatism                            | Bk     | Ml         | Pl         | 1  |
|                                                     |                                        |                  |                                             | Leguminosae                           |        |            |            |    |
| <i>Arachis hypogaea</i> L. (FC812)                  | Maní                                   | Cultivated       | Reproductive system and reproductive health | Aphrodisiac                           | Fr     | Fs         | Or         | 1  |
|                                                     |                                        |                  | Cultural diseases and disorders             | Tijte                                 | Lx     | Fs         | Bt         | 1  |
|                                                     |                                        |                  | Infections and infestations                 | UTA, leishmaniasis                    | Fr     | Dc, Dd, Ml | Bt, Kn, Pl | 4  |
| <i>Caesalpinia spinosa</i> (Molina) Kuntze (FC818)  | Tara, taya                             | Wild             | Digestive system                            | Diarrhoea                             | Fr     | If         | Or         | 1  |
|                                                     |                                        |                  | Dental health                               | Toothache                             | Ffr    | Dc         | Gg         | 1  |
|                                                     |                                        |                  | Skin and subcutaneous tissue                | Feet fungus                           | Fr     | Dc, Ml     | Bt, Kn     | 3  |
|                                                     |                                        |                  | Wounds, healing                             | Fr                                    | Ml     | Kn         | 1          |    |
|                                                     |                                        |                  | Tonsillitis                                 | Fr, Lf, Sd                            | If     | Gg, Or     | 38         |    |
| <i>Campsiandra angustifolia</i> Benth.              | Huacapurana                            | Cultivated       | Respiratory system                          | Cold                                  | Lf     | If         | Gg         | 1  |
|                                                     |                                        |                  | Flu                                         | Sd                                    | Dc     | Or         | 1          |    |
|                                                     |                                        |                  | Digestive system                            | Intestinal parasites                  | Lf     | If         | Or         | 1  |
| <i>Cicer arietinum</i> L.                           | Garbanzo                               | Cultivated       | Blood and cardio-vascular system            | Anemia                                | Fr     | Dc         | Or         | 1  |
| <i>Copaifera langsdorffii</i> Desf.                 | Copaiba                                | Cultivated, Wild | Other uses                                  | Cancer                                | Fr     | Oi         | Or         | 1  |
|                                                     |                                        |                  | Digestive system                            | Diarrhoea                             | Bk     | Oi         | Or         | 1  |
| <i>Crotalaria retusa</i> L.                         | Espanta muertos                        | Wild             | Cultural diseases and disorders             | Tacsho                                | Lf     | Fs         | Bt         | 1  |
|                                                     |                                        |                  | Reproductive system and reproductive health | Menstruation disorders                | Lf     | Dc         | Or         | 1  |
|                                                     |                                        |                  | Digestive system                            | Gastric ulcers                        | Lf     | Ml         | Or         | 1  |
|                                                     |                                        |                  | General ailments with unspecific symptoms   | General malaise                       | Lf     | If         | Or         | 1  |
|                                                     |                                        |                  | Other uses                                  | Cancer                                | Ep     | Dc         | Or         | 1  |
| <i>Desmodium molliculum</i> (Kunth) DC. (FC815)     | Pie de perro                           | Wild             | Skin and subcutaneous tissue                | Wounds, healing                       | Lf     | Dc         | Bt         | 1  |
|                                                     |                                        |                  | Urinary system                              | Kidney disorders, emollient, diuretic | Ep, Lf | Dc, If     | Or         | 65 |
|                                                     |                                        |                  | Blood and cardio-vascular system            | Anemia                                | Fr     | Dc         | Or         | 1  |
| <i>Erythrina edulis</i> Micheli (FC814)             | Pajuro                                 | Cultivated       | Pregnancy, birth and puerperium             | Birth                                 | Lf     | If         | Or         | 1  |
|                                                     |                                        |                  | Postpartum                                  | Lf                                    | If     | Bt         | 1          |    |
|                                                     |                                        |                  | Cultural diseases and disorders             | Pulsario                              | Bd, Lf | Fs         | Bt         | 2  |
|                                                     |                                        |                  | Aire, malaire                               | Lf                                    | Fs     | Bt         | 1          |    |
|                                                     |                                        |                  | Pregnancy, birth and puerperium             | Breastfeeding                         | Fr     | Dc, Jc     | Or         | 2  |
| <i>Glycine max</i> (L.) Merr. (FC558)               | Soya                                   | Cultivated       | Birth                                       | Fr                                    | Dc     | Or         | 1          |    |
|                                                     |                                        |                  | Reproductive system and reproductive health | Menopause                             | Fr     | Dc, Jc, Ml | Or         | 10 |
| <i>Glycyrrhiza glabra</i> L.                        | Regaliz                                | Wild             | Skin and subcutaneous tissue                | Feet fungus                           | Ep     | Ml         | Kn         |    |
| <i>Inga ingoides</i> (Rich.) Willd. (FC809)         | Guaba                                  | Wild             | Endocrine system                            | Diabetes                              | Fr     | Fs         | Or         | 2  |
| <i>Lens culinaris</i> Medik.                        | Lenteja                                | Cultivated       | Cultural diseases and disorders             | Susto, espanto                        | Lf     | Dc         | Or         | 1  |
|                                                     |                                        |                  | Blood and cardio-vascular system            | Anemia                                | Fr     | Dc         | Or         | 3  |
| <i>Lupinus exochus</i> C.P. Sm. (FC806)             | Chocho de antimonía, chocho del abuelo | Wild             | Cultural diseases and disorders             | Antimonia, gentil, viejo, antiguo     | Fr, Lf | Dc, If     | Bt         | 2  |
|                                                     |                                        |                  | Susto, espanto                              | Fr                                    | If     | Bt         | 1          |    |
| <i>Lupinus mutabilis</i> Sweet. (FC805)             | Chocho                                 | Cultivated       | Infections and infestations                 | Chickenpox                            | Fr     | Dc, Ml     | Bt         | 2  |
|                                                     |                                        |                  |                                             | Chicken pest                          | Fr     | Dc         | Or         | 1  |

|                                                                   |                     |            |                                             |                        |            |            |        |    |
|-------------------------------------------------------------------|---------------------|------------|---------------------------------------------|------------------------|------------|------------|--------|----|
|                                                                   |                     |            | General ailments with unspecific symptoms   | Fleas                  | Fr         | Dc         | Bt     | 1  |
|                                                                   |                     |            |                                             | Fever                  | Sd         | MI         | Pl     | 1  |
|                                                                   |                     |            | Blood and cardio-vascular system            | Anemia                 | Ep, Fr, Lf | If, Jc, MI | Or     | 40 |
|                                                                   |                     |            | Respiratory system                          | Flu                    | Lf         | MI         | Or     | 1  |
| <i>Medicago sativa</i> L. (FC802)                                 | Alfalfa             | Cultivated | Reproductive system and reproductive health | Menstruation disorders | Lf, Rro    | Dc, If, MI | Or     | 6  |
|                                                                   |                     |            | Urinary system                              | Prostate disorders     | Lf         | MI         | Or     | 1  |
|                                                                   |                     |            | Pregnancy, birth and puerperium             | Breastfeeding          | Lf         | If         | Or     | 2  |
| <i>Ormosia coccinea</i> (Aubl.)Jacks.                             | Huayruro            | Wild       | Ritual and magic uses                       | Bring good luck        | Sd         | Fs         | Nn     | 2  |
|                                                                   |                     |            |                                             | Negative vibes         | Sd         | Fs         | Nn     | 1  |
|                                                                   |                     |            | Cultural diseases and disorders             | Tacsho                 | Lf         | Fs         | Bt     | 1  |
|                                                                   |                     |            | Digestive system                            | Stomach cramps         | Lf         | If         | Or     | 3  |
| <i>Otholobium mexicanum</i> (L.f.) J.W. Grimes (FC807)            | Culén chico         | Wild       |                                             | Diarrhoea              | Lf         | If         | Or     | 13 |
|                                                                   |                     |            | General ailments with unspecific symptoms   | Fever                  | Lf         | If         | Or     | 1  |
|                                                                   |                     |            | Pregnancy, birth and puerperium             | Birth                  | Lf         | If         | Or     | 1  |
| <i>Phaseolus lunatus</i> L.                                       | Pallar              | Cultivated | Skin and subcutaneous tissue                | Burns                  | Lf         | Fs         | Kn     | 1  |
|                                                                   |                     |            | General ailments with unspecific symptoms   | Fever                  | Lf         | If         | Bt     | 1  |
|                                                                   |                     |            | Digestive system                            | Laxative               | Lf         | MI         | Or     | 1  |
| <i>Phaseolus pachyrrhizoides</i> Harms (FC810)                    | Habilla             | Cultivated |                                             | Hearing disorders      | Lf         | MI         | Bt     | 1  |
|                                                                   |                     |            | Sensory system                              | Visual disorders       | Lf         | MI         | Ew     | 1  |
|                                                                   |                     |            | Skin and subcutaneous tissue                | Burns                  | Lf         | Fs, MI     | Kn, Pl | 2  |
|                                                                   |                     |            | Pregnancy, birth and puerperium             | Birth                  | Bd, Lf     | If         | Or     | 1  |
| <i>Phaseolus vulgaris</i> L. (FC808)                              | Frejol              | Cultivated | Infections and infestations                 | Chickenpox             | Fr         | MI         | Pl     | 1  |
|                                                                   |                     |            | Blood and cardio-vascular system            | Anemia                 | Fr         | Dc         | Or     | 2  |
|                                                                   |                     |            | Endocrine system                            | Diabetes               | Bk, Fr     | Dc         | Or     | 3  |
| <i>Pisum sativum</i> L. (FC803)                                   | Arveja              | Cultivated | Muscular-skeletal system                    | Joint sprains          | Bk         | Dc         | Pl     | 1  |
| <i>Prosopis pallida</i> (Willd.) Kunth (FC811)                    | Huarango, algarrobo | Wild       | Infections and infestations                 | Chickenpox             | Fr         | Dc, MI     | Bt, Pl | 2  |
|                                                                   |                     |            | Other uses                                  | Hair loss              | St         | Dc         | Bt     | 1  |
|                                                                   |                     |            | Cultural diseases and disorders             | Susto, espanto         | Lf         | Dc         | Bt     | 1  |
| <i>Robinia pseudoacacia</i> L. (no voucher specimen)              | Flor blanca         | Cultivated | Infections and infestations                 | Chickenpox             | Fl         | Fs         | Bt     | 1  |
|                                                                   |                     |            | Blood and cardio-vascular system            | High pressure          | Fl         | MI         | Or     | 1  |
|                                                                   |                     |            | Reproductive system and reproductive health | Menopause              | Fl         | If         | Or     | 4  |
| <i>Senna bicapsularis</i> (L.) Roxb. (FC364)                      | Sen, mutuy          | Wild       |                                             | Laxative               | Lf         | Dc, If     | Or     | 12 |
|                                                                   |                     |            | Digestive system                            | Intestinal parasites   | Lf         | If         | Or     | 2  |
| <i>Senna multiglandulosa</i> (Jacq.) H.S. Irwin & Barneby (FC813) | Mutuy, muteo        | Wild       | Cultural diseases and disorders             | Susto, espanto         | Bd, Lf     | If         | Bt, Or | 2  |
|                                                                   |                     |            | Digestive system                            | Hepatitis              | Fl, Lf     | Dc, If     | Bt, Or | 50 |
| <i>Spartium junceum</i> L. (FC816)                                | Retama              | Wild       | Infections and infestations                 | Chickenpox             | Fl, Lf     | Dc, If     | Bt, Or | 2  |
|                                                                   |                     |            |                                             | Malaria                | Ep         | Dc         | Bt     | 1  |
|                                                                   |                     |            |                                             | Laxative               | Fr         | Jc         | Or     | 1  |
| <i>Tamarindus indica</i> L. (FC817)                               | Tamarindo           | Cultivated | Digestive system                            | Intestinal parasites   | Ffr        | Jc         | Or     | 1  |
|                                                                   |                     |            | Endocrine system                            | Diabetes               | Fr         | MI         | Or     | 1  |
| <i>Tephrosia sinapou</i> (Buc`hoz) A. Chev. (FC804)               | Bardasco            | Wild       | Infections and infestations                 | Lice                   | Lf         | MI         | Kn     | 1  |
| <i>Trifolium repens</i> L. (FC819)                                | Trébol              | Wild       | Ritual and magic uses                       | Bring good luck        | Lf         | Fs         | Nn     | 1  |

|                                                              |                                            |            |                                                |                                                |        |        |        |    |
|--------------------------------------------------------------|--------------------------------------------|------------|------------------------------------------------|------------------------------------------------|--------|--------|--------|----|
| <i>Lilium longiflorum</i> Thunb.<br>(FC820)                  | Azucena, azucena<br>Cultivated             | Cultivated | General ailments with<br>unspecific symptoms   | Headache                                       | Fr     | Fs     | Kn     | 1  |
|                                                              |                                            |            | Nervous system and<br>mental health            | Sadness                                        | Fl     | If     | Or     | 2  |
|                                                              |                                            |            | Reproductive system and<br>reproductive health | Fertility                                      | Fr     | If     | Or     | 1  |
| Linaceae                                                     |                                            |            |                                                |                                                |        |        |        |    |
| <i>Linum usitatissimum</i> L.<br>(FC821)                     | Linaza                                     | Cultivated | Metabolic system and<br>nutrition              | Weight loss                                    | Sd     | Dc, If | Or     | 2  |
|                                                              |                                            |            | Digestive system                               | Diarrhoea                                      | Sd     | Dc, Jc | Or     | 3  |
|                                                              |                                            |            | Pregnancy, birth and<br>puerperium             | Birth                                          | Sd     | Dc     | Or     | 3  |
|                                                              |                                            |            | Urinary system                                 | Kidney<br>disorders,<br>emollient,<br>diuretic | Ssd    | Dc, If | Or     | 22 |
| Loasaceae                                                    |                                            |            |                                                |                                                |        |        |        |    |
| <i>Nasa cuatrecasii</i> Weigend<br>(FC822)                   | Ortiga blanca                              | Wild       | Reproductive system and<br>reproductive health | Menstruation<br>disorders                      | Sd     | MI     | Or     | 1  |
| Lythraceae                                                   |                                            |            |                                                |                                                |        |        |        |    |
| <i>Cuphea ciliata</i> Ruiz & Pav.<br>(FC823)                 | Chinchimal                                 | Wild       | Urinary system                                 | Kidney<br>disorders,<br>emollient,<br>diuretic | Lf     | Dc     | Or     | 1  |
| <i>Punica granatum</i> L. (FC824)                            | Granada                                    | Cultivated | Digestive system                               | Diarrhoea                                      | Lf     | Dc     | Or     | 1  |
| Malpighiaceae                                                |                                            |            |                                                |                                                |        |        |        |    |
| <i>Bunchosia armeniaca</i> (Cav.) DC.                        | Cansaboca                                  | Cultivated | Pregnancy, birth and<br>puerperium             | Postpartum                                     | Lf     | Dc     | Or     | 1  |
| Malvaceae                                                    |                                            |            |                                                |                                                |        |        |        |    |
| <i>Fuertesimalva leptocalyx</i><br>(Krapov.) Fryxell (FC831) | Malva Wild                                 | Wild       | Infections and infestations                    | Malaria                                        | Lf     | If     | Or     | 1  |
|                                                              |                                            |            | Infections and infestations                    | UTA,<br>leishmaniasis                          | Sd     | Wm     | Pl     | 1  |
| <i>Gossypium hirsutum</i> L. (FC825)                         | Algodón                                    | Cultivated | Sensory system                                 | Hearing<br>disorders                           | Sd     | Fs     | Bt     | 1  |
|                                                              |                                            |            | Aire, malaire                                  | Sd                                             | Fs     | Bt, Pl | 3      |    |
|                                                              |                                            |            | Cultural diseases and<br>disorders             | Antimonia,<br>gentil, viejo,<br>antiguo        | Sd     | Fs     | Bt     | 1  |
|                                                              |                                            |            | Tacsho                                         | Sd                                             | If     | Or     | 1      |    |
| <i>Heliocarpus americanus</i> L.<br>(FC832)                  | Yansabalsa, yansakiri                      | Wild       | Pregnancy, birth and<br>puerperium             | Birth                                          | Bk     | If     | Or     | 1  |
|                                                              |                                            |            | Digestive system                               | Diarrhoea                                      | Bk     | If     | Or     | 1  |
|                                                              |                                            |            | Blood and cardio-vascular<br>system            | Hemorrhoids                                    | Lf     | Dc     | Vp     | 1  |
|                                                              |                                            |            | Reproductive system and<br>reproductive health | Menstruation<br>disorders                      | Lf     | If     | Or     | 1  |
|                                                              |                                            |            | Stomach cramps                                 | Lf                                             | If     | Or     | 1      |    |
|                                                              |                                            |            | Digestive system                               | Diarrhoea                                      | Lf     | If     | Or     | 1  |
|                                                              |                                            |            | Laxative                                       | Lf                                             | Dc, If | Or     | 6      |    |
|                                                              |                                            |            | General ailments with<br>unspecific symptoms   | Fever                                          | Lf     | Dc     | Bt     | 1  |
| <i>Malva arborea</i> (L.) Webb &<br>Berthel. (FC830)         | Malva Cultivated                           | Cultivated | Sensory system                                 | Visual disorders                               | Lf     | Dc, If | Bt     | 2  |
|                                                              |                                            |            | Prostate<br>disorders                          | Lf                                             | If     | Or     | 1      |    |
|                                                              |                                            |            | Urinary system                                 | Kidney<br>disorders,<br>emollient,<br>diuretic | Ep, Lf | Dc, If | Or     | 2  |
|                                                              |                                            |            | Skin and subcutaneous<br>tissue                | Wounds, healing                                | Lf     | Dc     | Bt     | 3  |
|                                                              |                                            |            | Pregnancy, birth and<br>puerperium             | Postpartum                                     | Lf     | If     | Bt     | 1  |
| <i>Malvastrum tomentosum</i> (L.)<br>S.R. Hill (FC826)       | Angusacha, ancosacha,<br>lancosacha, yator | Wild       | Skin and subcutaneous<br>tissue                | Wounds, healing                                | Lf     | Dc, If | Bt, Or | 2  |
|                                                              |                                            |            | Digestive system                               | Hepatitis                                      | Lf     | Dc     | Or     | 1  |

|                                                       |                                  |                  |                                           |                                       |                |                    |            |    |
|-------------------------------------------------------|----------------------------------|------------------|-------------------------------------------|---------------------------------------|----------------|--------------------|------------|----|
|                                                       |                                  |                  | Cultural diseases and disorders           | Tijte                                 | Sp             | Fs                 | Wh         | 1  |
|                                                       |                                  |                  |                                           | Pulsario                              | Lf             | Fs                 | Pl         | 1  |
|                                                       |                                  |                  | Other uses                                | Cancer                                | Ep             | If                 | Or         | 1  |
|                                                       |                                  |                  |                                           | Hair loss                             | Ep, Lf         | Dc                 | Bt         | 4  |
|                                                       |                                  |                  | Muscular-skeletal system                  | Hernia                                | Bk             | Dc                 | Pl         | 1  |
|                                                       |                                  |                  | Respiratory system                        | Flu                                   | Lf             | If                 | Or         | 1  |
|                                                       |                                  |                  | Sensory system                            | Visual disorders                      | Lf             | If                 | Pl         | 1  |
|                                                       |                                  |                  |                                           | Kidney disorders, emollient, diuretic | Lf             | If                 | Or         | 1  |
| <i>Ochroma pyramidale</i> (Cav. ex Lam.) Urb. (FC827) | Balsa, palma de mano, palo balsa | Wild             | Urinary system                            | Kidney disorders, emollient, diuretic | Bk             | Dc                 | Or         | 1  |
| <i>Theobroma cacao</i> L. (FC829)                     | Cacao                            | Cultivated       | Pregnancy, birth and puerperium           | Breastfeeding Birth                   | Fr             | MI                 | Or         | 5  |
|                                                       |                                  |                  |                                           |                                       | Fr             | Dc, MI             | Or         | 6  |
| <i>Triumfetta semitriloba</i> Jacq. (FC828)           | Cabayusa                         | Wild             | Infections and infestations               | Malaria                               | Fr             | Fm                 | Kn         | 1  |
| Melastomataceae                                       |                                  |                  |                                           |                                       |                |                    |            |    |
| <i>Miconia</i> sp. (FC833)                            | Shambo                           | Wild             | Infections and infestations               | Chickenpox                            | Lf             | If                 | Bt         | 1  |
| Monimiaceae                                           |                                  |                  |                                           |                                       |                |                    |            |    |
| <i>Peumus boldus</i> Molina (FC834)                   | Boldo                            | Wild             | Nervous system and mental health          | Insomnia                              | Lf             | If                 | Or         | 1  |
|                                                       |                                  |                  | Digestive system                          | Diarrhoea                             | Lf             | Dc                 | Or         | 1  |
| Moraceae                                              |                                  |                  |                                           |                                       |                |                    |            |    |
|                                                       |                                  |                  | Sensory system                            | Visual disorders                      | Lf             | If                 | Pl         | 1  |
|                                                       |                                  |                  | Cultural diseases and disorders           | Tijte                                 | Lx             | Fs                 | Pl         | 1  |
|                                                       |                                  |                  |                                           | Pulsario                              | Lf             | Dc                 | Or         | 1  |
| <i>Ficus carica</i> L. (FC835)                        | Higos, higo                      | Cultivated       | Skin and subcutaneous tissue              | Burns                                 | Lx             | Fs                 | Pl         | 1  |
|                                                       |                                  |                  |                                           | Feet fungus                           | Lx             | Fs                 | Bt         | 1  |
|                                                       |                                  |                  |                                           | Birth                                 | Lf             | If                 | Or         | 1  |
|                                                       |                                  |                  | Pregnancy, birth and puerperium           | Breastfeeding                         | Fr, Lf, Lx     | Fs, If             | Or, Pl     | 3  |
|                                                       |                                  |                  | Other uses                                | Hair loss                             | Lf             | If                 | Or         | 1  |
| <i>Ficus insipida</i> Willd. (FC836)                  | Higuerón, ojé                    | Wild             | Infections and infestations               | UTA, leishmaniasis                    | Lf             | Dc                 | Bt         | 1  |
|                                                       |                                  |                  | Muscular-skeletal system                  | Joint sprains                         | Lf             | MI                 | Pl         | 1  |
| <i>Ficus maxima</i> Mill. (FC837)                     | Morero                           | Wild             | Cultural diseases and disorders           | Tijte                                 | Ep             | Fs                 | Kn         | 1  |
|                                                       |                                  |                  | Dental health                             | Toothache                             | Lx, Sd         | Fs, MI             | Bt, Kn     | 2  |
| Moringaceae                                           |                                  |                  |                                           |                                       |                |                    |            |    |
|                                                       |                                  |                  | Other uses                                | Cancer                                | Lf             | If                 | Or         | 1  |
| <i>Moringa oleifera</i> Lam.                          | Moringa                          | Cultivated, wild | Urinary system                            | Kidney disorders, emollient, diuretic | Lf             | If                 | Or         | 1  |
| Musaceae                                              |                                  |                  |                                           |                                       |                |                    |            |    |
|                                                       |                                  |                  | Blood and cardio-vascular system          | Anemia                                | Fr, Lx, St     | If, MI             | Or         | 2  |
|                                                       |                                  |                  | Cultural diseases and disorders           | Tijte                                 | Bk, Lx         | Dc, Fs, Wm         | Bt, Kn, Pl | 6  |
|                                                       |                                  |                  | Skin and subcutaneous tissue              | Feet fungus                           | Bk             | Dc                 | Bt, Or     | 2  |
|                                                       |                                  |                  |                                           | Diarrhoea                             | Bk, Fr, Lf, Lx | Dc, Fs, If, MI, Wm | Or         | 7  |
| <i>Musa acuminata</i> Colla (FC839)                   | Plátano                          | Cultivated       | Digestive system                          | Stomach pain                          | Fr             | Fs                 | Or         | 3  |
|                                                       |                                  |                  |                                           | Indigestive                           | Fr             | Fs                 | Or         | 20 |
|                                                       |                                  |                  |                                           | Laxative                              | Fr             | MI                 | Or         | 1  |
|                                                       |                                  |                  |                                           | Gastric ulcers                        | Lx             | If, Wm             | Or         | 2  |
|                                                       |                                  |                  | General ailments with unspecific symptoms | Headache                              | Fr             | Fs                 | Or         | 5  |
|                                                       |                                  |                  |                                           | Insect bite                           | Bk             | If                 | Bt         | 1  |
|                                                       |                                  |                  | Infections and infestations               | UTA, leishmaniasis                    | St             | Fs                 | Pl         | 1  |

|                                                                    |                |            |                                             |                                       |                |                |                    |    |
|--------------------------------------------------------------------|----------------|------------|---------------------------------------------|---------------------------------------|----------------|----------------|--------------------|----|
| <i>Musa x paradisiaca</i> L. (FC838)                               | Guineo         | Cultivated | Muscular-skeletal system                    | Joint sprains                         | Bk             | Dc             | Pl                 | 1  |
|                                                                    |                |            |                                             | Muscle cramps                         | Fr             | Fs             | Or                 | 1  |
|                                                                    |                |            | Reproductive system and reproductive health | Menstruation disorders                | Lx             | Fs             | Bt                 | 1  |
|                                                                    |                |            | Urinary system                              | Kidney disorders, emollient, diuretic | Ffr, Lf        | Fs             | Or, Pl             | 2  |
|                                                                    |                |            | Pregnancy, birth and puerperium             | Breastfeeding                         | Fr             | Fs, If, Ml     | Or                 | 5  |
|                                                                    |                |            | Metabolic system and nutrition              | Weight loss                           | Fr             | Fs             | Or                 | 2  |
|                                                                    |                |            | Skin and subcutaneous tissue                | Itil                                  | Bk             | Fs             | Bt, Pl, Wh         | 4  |
|                                                                    |                |            |                                             | Wounds, healing                       | Lx             | Fs             | Bt                 | 1  |
|                                                                    |                |            |                                             | Acne                                  | Bk             | Fs             | Or                 | 1  |
|                                                                    |                |            |                                             | Feet fungus                           | Bk             | Dc             | Bt                 | 1  |
|                                                                    |                |            | Cultural diseases and disorders             | Tijte                                 | Lx             | Fs             | Pl                 | 1  |
|                                                                    |                |            | Infections and infestations                 | Insect bite                           | Lf             | Ml             | Kn                 | 1  |
|                                                                    |                |            | Skin and subcutaneous tissue                | Itil                                  | Bk             | Fs             | Pl                 | 1  |
|                                                                    |                |            | Blood and cardio-vascular system            | Hemorrhoids                           | Lx             | Fs             | Bt                 | 1  |
|                                                                    |                |            | Digestive system                            | Diarrhoea                             | St             | Fs             | Or                 | 1  |
|                                                                    |                |            |                                             | Hepatitis                             | St             | Ml             | Or                 | 1  |
|                                                                    |                |            | <b>Myricaceae</b>                           |                                       |                |                |                    |    |
|                                                                    |                |            | Cultural diseases and disorders             | Susto, espanto                        | Lf             | Ml             | Pl                 | 1  |
|                                                                    |                |            | Infections and infestations                 | UTA, leishmaniasis                    | Lf             | Dc, Fs, If     | Bt, Or, Pl         | 8  |
|                                                                    |                |            | <b>Myrtaceae</b>                            |                                       |                |                |                    |    |
| <i>Morella pubescens</i> (Humb. & Bonpl. ex Willd.) Wilbur (FC840) | Laurel         | Wild       | Nervous system and mental health            | Insomnia                              | Lf             | If             | Or                 | 1  |
|                                                                    |                |            | Respiratory system                          | Flu                                   | Lf             | Dc, If         | Bt, Or, Vp         | 49 |
|                                                                    |                |            |                                             | Cough                                 | Bd, Lf         | Dc, If, Wm     | Or, Pl             | 5  |
|                                                                    |                |            | General ailments with unspecific symptoms   | Fever                                 | Lf             | Dc, If         | Or                 | 2  |
|                                                                    |                |            |                                             | General malaise                       | Lf             | Dc             | Bt                 | 1  |
|                                                                    |                |            | Infections and infestations                 | Insect bite                           | Lf             | Fs, Ml, Wm     | Bt, Kn, Or, Pl, Vp | 10 |
|                                                                    |                |            | Muscular-skeletal system                    | Rheumatism                            | Lf             | Dc, Fm, If, Ml | Bt, Kn             | 7  |
|                                                                    |                |            |                                             | Joint sprains                         | Lf             | Fm, Fs         | Kn, Pl             | 2  |
|                                                                    |                |            | Cultural diseases and disorders             | Tijte                                 | Lx             | Fs             | Bt                 | 1  |
|                                                                    |                |            | Pregnancy, birth and puerperium             | Birth                                 | Lf             | Fm, If         | Or                 | 6  |
| <i>Myrcianthes fragans</i> (Sw.) McVaugh (FC844)                   | Ushún, ushungo | Wild       | Blood and cardio-vascular system            | Anemia                                | Fr             | Dc, Fs         | Or                 | 2  |
|                                                                    |                |            | Digestive system                            | Diarrhoea                             | Bd, Bk, Fr, Lf | Dc, Fs, If     | Or                 | 13 |
|                                                                    |                |            |                                             | Laxative                              | Sd             | Ml             | Or                 | 1  |
|                                                                    |                |            | Muscular-skeletal system                    | Bones hardening                       | Fr             | Fs             | Or                 | 1  |
|                                                                    |                |            | Other uses                                  | Hair loss                             | Lf             | Dc             | Bt                 | 2  |
|                                                                    |                |            | Pregnancy, birth and puerperium             | Birth                                 | Lf             | If             | Or                 | 1  |
|                                                                    |                |            | Nervous system and mental health            | Mental stimulant                      | Fr             | Fs             | Or                 | 1  |
|                                                                    |                |            | Urinary system                              | Prostate disorders                    | Lf             | If             | Or                 | 1  |
|                                                                    |                |            | Digestive system                            | Diarrhoea                             | Fl             | If             | Or                 | 1  |
|                                                                    |                |            | Dental health                               | Cavity                                | Fl             | Fs, Ml         | Bt, Or, Pl         | 8  |
| <i>Psidium guajava</i> L. (FC843)                                  | Guayaba        | Cultivated |                                             |                                       |                |                |                    |    |
|                                                                    |                |            |                                             |                                       |                |                |                    |    |
|                                                                    |                |            |                                             |                                       |                |                |                    |    |
|                                                                    |                |            |                                             |                                       |                |                |                    |    |
| <i>Syzygium aromaticum</i> (L.) Merr. & L.M. Perry (FC841)         | Clavo de olor  | Cultivated |                                             |                                       |                |                |                    |    |
|                                                                    |                |            |                                             |                                       |                |                |                    |    |
|                                                                    |                |            |                                             |                                       |                |                |                    |    |

|                                                                                                                    |                                                              |            |                                                |                                                |                   |                   |               |    |
|--------------------------------------------------------------------------------------------------------------------|--------------------------------------------------------------|------------|------------------------------------------------|------------------------------------------------|-------------------|-------------------|---------------|----|
|                                                                                                                    |                                                              |            |                                                | Toothache                                      | Fl, Fr,<br>Sd, St | Fs, Ml            | Bt, Or,<br>Pl | 61 |
|                                                                                                                    |                                                              |            | <b>Oleaceae</b>                                |                                                |                   |                   |               |    |
| <i>Olea europaea</i> L. (FC845)                                                                                    | Olivo                                                        | Cultivated | Other uses                                     | Hair loss                                      | Fr                | Oi                | Bt            | 1  |
|                                                                                                                    |                                                              |            | Digestive system                               | Laxative                                       | Fr                | Oi                | Or            | 1  |
|                                                                                                                    |                                                              |            | <b>Onagraceae</b>                              |                                                |                   |                   |               |    |
| <i>Fuchsia rivularis</i> J.F. Macbr.                                                                               | Santa Lucía                                                  | Wild       | Skin and subcutaneous<br>tissue                | Wounds, healing                                | Lf                | Fs                | Kn            | 1  |
| <i>Oenothera rosea</i> L'Hér. ex<br>Aiton (FC846)                                                                  | Chupasangre                                                  | Wild       | Reproductive system and<br>reproductive health | Menstruation<br>disorders                      | Ep                | Ml                | Kn            | 1  |
|                                                                                                                    |                                                              |            | <b>Orchidaceae</b>                             |                                                |                   |                   |               |    |
| <i>Epidendrum laciniitropis</i><br>Hágsater (FC848)                                                                | Monterrosa                                                   | Wild       | Cultural diseases and<br>disorders             | Pulsario                                       | Fl                | If                | Or            | 1  |
| <i>Epidendrum secundum</i> Jacq.<br>(FC847)                                                                        | Inguilito, inguil                                            | Wild       | Nervous system and<br>mental health            | Sadness                                        | Fl                | Dc                | Or            | 1  |
|                                                                                                                    |                                                              |            | <b>Oxalidaceae</b>                             |                                                |                   |                   |               |    |
|                                                                                                                    |                                                              |            | Blood and cardio-vascular<br>system            | High pressure                                  | Fr                | Jc, Mml           | Or            | 5  |
| <i>Averrhoa carambola</i> L. (FC849)                                                                               | Carambola                                                    | Cultivated | Pregnancy, birth and<br>puerperium             | Birth                                          | Fr                | Jc                | Or            | 1  |
|                                                                                                                    |                                                              |            | Other uses                                     | Cancer                                         | Ro                | Ml                | Or            | 1  |
| <i>Oxalis tuberosa</i> Molina (FC850)                                                                              | Ocas                                                         | Cultivated | Urinary system                                 | Prostate<br>disorders                          | Ro                | Ml                | Or            | 1  |
|                                                                                                                    |                                                              |            | <b>Papaveraceae</b>                            |                                                |                   |                   |               |    |
| <i>Bocconia integrifolia</i> Bonpl.<br>(FC851)                                                                     | Huacango, atujtallga,<br>mangapaqui,<br>mangapaque, sandoval | Wild       | Cultural diseases and<br>disorders             | Antimonia,<br>gentil, viejo,<br>antiguo        | Lf                | If                | Bt            | 1  |
|                                                                                                                    |                                                              |            | <b>Passifloraceae</b>                          |                                                |                   |                   |               |    |
|                                                                                                                    |                                                              |            | Blood and cardio-vascular<br>system            | High pressure                                  | Fr, Sd            | Fs, If, Jc,<br>Ml | Or            | 46 |
|                                                                                                                    |                                                              |            | General ailments with<br>unspecific symptoms   | Headache                                       | Fr                | If                | Or            | 1  |
| <i>Passiflora edulis</i> Sims. (FC853)                                                                             | Maracuyá                                                     | Cultivated | Digestive system                               | Intestinal<br>parasites                        | Fr                | Jc                | Or            | 1  |
|                                                                                                                    |                                                              |            |                                                | Laxative                                       | Fr                | Jc                | Or            | 1  |
|                                                                                                                    |                                                              |            | Reproductive system and<br>reproductive health | Menopause                                      | Ffr, Lf           | Jc, Ml            | Or            | 2  |
|                                                                                                                    |                                                              |            | Respiratory system                             | Cold                                           | Fr                | Fs                | Or            | 1  |
|                                                                                                                    |                                                              |            | General ailments with<br>unspecific symptoms   | Fever                                          | Lf                | If                | Or            | 1  |
|                                                                                                                    |                                                              |            |                                                | Indigestive                                    | Fr                | Fs                | Or            | 1  |
|                                                                                                                    |                                                              |            |                                                | Constipation                                   | Fr                | Fs                | Or            | 4  |
|                                                                                                                    |                                                              |            | Digestive system                               | Intestinal<br>infection                        | Fr                | Fs                | Or            | 1  |
| <i>Passiflora ligularis</i> Juss.<br>(FC852)                                                                       | Granadilla                                                   | Cultivated |                                                | Liver disorders                                | Fr                | Fs                | Or            | 1  |
|                                                                                                                    |                                                              |            |                                                | Laxative                                       | Fr, Lf,<br>Sd     | Fs, If, Jc        | Or            | 15 |
|                                                                                                                    |                                                              |            |                                                | Prostate<br>disorders                          | Fr                | Fs                | Or            | 1  |
|                                                                                                                    |                                                              |            | Urinary system                                 | Kidney<br>disorders,<br>emollient,<br>diuretic | Fr, Lf            | Fs, If,<br>Wm     | Or, Pl        | 6  |
|                                                                                                                    |                                                              |            | Cultural diseases and<br>disorders             | Pulsario                                       | Lf                | Fs                | Pl            | 1  |
|                                                                                                                    |                                                              |            |                                                | Susto, espanto                                 | Lf, Sd            | Dc, If            | Bt, Or        | 3  |
|                                                                                                                    |                                                              |            |                                                | Rheumatism                                     | Fr                | If                | Or            | 1  |
|                                                                                                                    |                                                              |            | Muscular-skeletal system                       | Joint sprains                                  | Fr, Lf            | Fs, If,<br>Ml, Wm | Or, Pl        | 5  |
| <i>Passiflora tripartita</i> (Juss.) Poir.<br>var. <i>mollissima</i> (Kunth.) Holm-<br>Niels. & P.M. Jørg. (FC854) | Pur pur                                                      | Cultivated | Pregnancy, birth and<br>puerperium             | Birth                                          | Fr, Lf            | Dc, Fs            | Or            | 3  |
|                                                                                                                    |                                                              |            | Urinary system                                 | Kidney<br>disorders,<br>emollient,<br>diuretic | Lf                | Dc                | Or            | 1  |
|                                                                                                                    |                                                              |            | Reproductive system and<br>reproductive health | Menstruation<br>disorders                      | Fr                | Dc                | Or            | 1  |

|                                     |                     |                                       |                                             |                                       |            |                                 |                |    |        |        |   |
|-------------------------------------|---------------------|---------------------------------------|---------------------------------------------|---------------------------------------|------------|---------------------------------|----------------|----|--------|--------|---|
| Pedaliaceae                         |                     |                                       |                                             |                                       |            |                                 |                |    |        |        |   |
| Sesamum indicum L. (FC855)          | Ajonjolí            | Wild                                  | Reproductive system and reproductive health | Menopause                             | Fr         | Ml                              | Or             | 1  |        |        |   |
|                                     |                     |                                       | Digestive system                            | Diarrhoea                             | Bk         | If                              | Or             | 1  |        |        |   |
|                                     |                     |                                       | Muscular-skeletal system                    | Hernia                                | Bk         | Dc                              | Or             | 1  |        |        |   |
| Phyllanthaceae                      |                     |                                       |                                             |                                       |            |                                 |                |    |        |        |   |
| Phyllanthus niruri L. (FC856)       | Chancapiedra        | Wild                                  | Urinary system                              | Prostate disorders                    | Ep, Lf     | If                              | Or             | 8  |        |        |   |
|                                     |                     |                                       |                                             | Kidney disorders, emollient, diuretic | Ap, Ep, Lf | Dc, If                          | Or             | 38 |        |        |   |
|                                     |                     |                                       | Reproductive system and reproductive health | Menstruation disorders                | Lf         | If                              | Or             | 1  |        |        |   |
|                                     |                     |                                       | Skin and subcutaneous tissue                | Wounds, healing                       | Ep         | If                              | Or             | 1  |        |        |   |
|                                     |                     |                                       | Phytolaccaceae                              |                                       |            |                                 |                |    |        |        |   |
| Phytolacca bogotensis Kunth (FC857) | Airambo             | Wild                                  | Cultural diseases and disorders             | Susto, espanto                        | Ep         | If                              | Bt             | 1  |        |        |   |
|                                     |                     |                                       | Infections and infestations                 | Fleas                                 | Ep, Ssd    | Dc, If                          | Bt, Or         | 3  |        |        |   |
| Pinaceae                            |                     |                                       |                                             |                                       |            |                                 |                |    |        |        |   |
| Pinus radiata D. Don (FC858)        | Pino                | Cultivated                            | Dental health                               | Toothache                             | Lx         | Fs                              | Pl             | 1  |        |        |   |
| Piperaceae                          |                     |                                       |                                             |                                       |            |                                 |                |    |        |        |   |
| Peperomia microphylla Kunth (FC859) | Congona             | Cultivated                            | Cultural diseases and disorders             | Susto, espanto                        | Lf         | If                              | Bt, Or         | 2  |        |        |   |
|                                     |                     |                                       | Cultural diseases and disorders             | Sadness                               | Lf         | If                              | Or             | 9  |        |        |   |
|                                     |                     |                                       | Cultural diseases and disorders             | Insomnia                              | Ap, Lf     | If                              | Or             | 2  |        |        |   |
|                                     |                     |                                       | Blood and cardio-vascular system            | High pressure                         | Lf         | If                              | Or             | 1  |        |        |   |
|                                     |                     |                                       | Digestive system                            | Stomach cramps                        | Lf         | If                              | Or             | 2  |        |        |   |
|                                     |                     |                                       | Reproductive system and reproductive health | Menopause                             | Lf         | If                              | Or             | 1  |        |        |   |
|                                     |                     |                                       | Infections and infestations                 | UTA, leishmaniasis                    | Lf         | Dc                              | Bt             | 1  |        |        |   |
|                                     |                     |                                       |                                             | Chickenpox                            | Lf         | If                              | Bt             | 1  |        |        |   |
|                                     |                     |                                       | Muscular-skeletal system                    | Joint sprains                         | Lf         | Fs                              | Pl             | 1  |        |        |   |
|                                     |                     |                                       | Other uses                                  | Cancer                                | Lf         | If                              | Or             | 2  |        |        |   |
|                                     |                     |                                       |                                             | Hair loss                             | Lf         | Dc                              | Bt             | 1  |        |        |   |
|                                     |                     |                                       | Reproductive system and reproductive health | Vaginal infection                     | Lf         | If                              | Or             | 1  |        |        |   |
|                                     |                     |                                       | Skin and subcutaneous tissue                | Acne                                  | Lf         | Ml                              | Pl             | 1  |        |        |   |
|                                     |                     |                                       |                                             | Wounds, healing                       | Lf         | Dc, If, Ml                      | Bt, Kn, Or     | 10 |        |        |   |
|                                     |                     |                                       | Piper acutifolium Ruiz & Pav. (FC860)       | Matico de huerta                      | Cultivated | Digestive system                | Burns          | Lf | Dd, Ml | Bt, Kn | 3 |
| Stomach cramps                      | Lf                  | Dc, If                                |                                             |                                       |            |                                 | Or             | 5  |        |        |   |
| Digestive system                    | Diarrhoea           | Lf                                    |                                             |                                       |            | If                              | Or             | 2  |        |        |   |
|                                     | Gastric ulcers      | Lf                                    |                                             |                                       |            | Dc, If                          | Or             | 2  |        |        |   |
| Blood and cardio-vascular system    | Hemorrhoids         | Lf                                    |                                             |                                       |            | Dc                              | Vp             | 1  |        |        |   |
|                                     | High pressure       | Lf                                    |                                             |                                       |            | If                              | Or             | 1  |        |        |   |
| Respiratory system                  | Flu                 | Lf                                    |                                             |                                       |            | If                              | Bt             | 46 |        |        |   |
|                                     | Cough               | Lf                                    |                                             |                                       |            | Dc, If                          | Or             | 15 |        |        |   |
| Prostate disorders                  |                     | Lf                                    |                                             |                                       |            | If                              | Or             | 2  |        |        |   |
|                                     | Urinary system      | Kidney disorders, emollient, diuretic |                                             |                                       |            | Lf                              | If             | Or | 3      |        |   |
| Cultural diseases and disorders     |                     | Susto, espanto                        |                                             |                                       |            | Lf                              | If             | Bt | 1      |        |   |
|                                     | Piper aequale Vahl. | Cordoncillo pequeño                   |                                             |                                       |            | Wild                            |                |    |        |        |   |
| Piper nigrum L.                     | Pimienta            | Cultivated                            |                                             |                                       |            | Dental health                   | Toothache      | Fr | Fs     | Pl     | 1 |
| Plantaginaceae                      |                     |                                       |                                             |                                       |            |                                 |                |    |        |        |   |
| Globularia alypum L.                | Coronilla           | Cultivated                            |                                             |                                       |            | Pregnancy, birth and puerperium | Birth          | Lf | If     | Or     | 1 |
| Plantago major L. (FC861)           | Llantén             | Cultivated                            | Skin and subcutaneous tissue                | Wounds, healing                       | Lf         | Dc, Fs, If, Ml, Wm              | Bt, Kn, Or, Pl | 93 |        |        |   |

|                                                                                                                                                                                                                                                                                                      |                                                                                          |                                                                                                    |                                             |                                       |               |                    |            |    |
|------------------------------------------------------------------------------------------------------------------------------------------------------------------------------------------------------------------------------------------------------------------------------------------------------|------------------------------------------------------------------------------------------|----------------------------------------------------------------------------------------------------|---------------------------------------------|---------------------------------------|---------------|--------------------|------------|----|
| <i>Avena sativa</i> L.<br><br><i>Cortaderia jubata</i> (Lemoine ex Carrière) Stapf. (FC867)<br><br><i>Cymbopogon citratus</i> (DC.) Stapf (FC869)<br><br><i>Cynodon dactylon</i> (L.) Pers. (FC868)<br><i>Gynerium sagittatum</i> (Aubl.) P. Beauv. (FC863)<br><br><i>Hordeum vulgare</i> L. (FC866) | Avena<br><br>Cortadera<br><br>Hierbaluisa<br><br>Grama dulce<br>Caña brava<br><br>Cebada | Cultivated<br><br>Wild<br><br>Cultivated<br><br>Wild<br>Wild<br><br>Wild<br>Wild<br><br>Cultivated |                                             | Feet fungus                           | Lf            | Dc                 | Bt         | 1  |
|                                                                                                                                                                                                                                                                                                      |                                                                                          |                                                                                                    |                                             | Burns                                 | Lf            | Dc, Fs, If, Ml, Wm | Bt, Or, Pl | 10 |
|                                                                                                                                                                                                                                                                                                      |                                                                                          |                                                                                                    | Other uses                                  | Hair loss                             | Lf            | Dc, If             | Bt         | 2  |
|                                                                                                                                                                                                                                                                                                      |                                                                                          |                                                                                                    | Dental health                               | Toothache                             | Lf            | Dc, If, Wm         | Bt, Gg, Pl | 5  |
|                                                                                                                                                                                                                                                                                                      |                                                                                          |                                                                                                    | Digestive system                            | Stomach cramps                        | Lf            | If                 | Or         | 1  |
|                                                                                                                                                                                                                                                                                                      |                                                                                          |                                                                                                    | General ailments with unspecific symptoms   | Fever                                 | Lf            | Dc, Fs, If         | Bt, Or     | 3  |
|                                                                                                                                                                                                                                                                                                      |                                                                                          |                                                                                                    | Infections and infestations                 | Insect bite                           | Lf            | Dc, Ml             | Bt, Kn     | 3  |
|                                                                                                                                                                                                                                                                                                      |                                                                                          |                                                                                                    |                                             | Chickenpox                            | Lf            | Dc                 | Bt         | 1  |
|                                                                                                                                                                                                                                                                                                      |                                                                                          |                                                                                                    | Blood and cardio-vascular system            | Hemorrhoids                           | Lf            | Dc, If             | Bt, Vp     | 5  |
|                                                                                                                                                                                                                                                                                                      |                                                                                          |                                                                                                    | Pregnancy, birth and puerperium             | Postpartum                            | Lf            | If                 | Bt         | 1  |
|                                                                                                                                                                                                                                                                                                      |                                                                                          |                                                                                                    | Muscular-skeletal system                    | Joint sprains                         | Lf            | Fs                 | Kn         | 1  |
|                                                                                                                                                                                                                                                                                                      |                                                                                          |                                                                                                    |                                             | Rheumatism                            | Lf            | Fs                 | Pl         | 1  |
|                                                                                                                                                                                                                                                                                                      |                                                                                          |                                                                                                    | Nervous system and mental health            | Insomnia                              | Lf            | If                 | Or         | 1  |
|                                                                                                                                                                                                                                                                                                      |                                                                                          |                                                                                                    | Reproductive system and reproductive health | Menstruation disorders                | Lf            | If, Ml             | Bt, Or, Pl | 4  |
|                                                                                                                                                                                                                                                                                                      |                                                                                          |                                                                                                    | Sensory system                              | Visual disorders                      | Lf            | Dc, If             | Bt, Or     | 6  |
|                                                                                                                                                                                                                                                                                                      |                                                                                          |                                                                                                    | Urinary system                              | Kidney disorders, emollient, diuretic | Lf            | Ddc, Fs, If, Ml    | Or, Pl     | 21 |
|                                                                                                                                                                                                                                                                                                      |                                                                                          |                                                                                                    |                                             | Prostate disorders                    | Lf            | If                 | Or         | 1  |
|                                                                                                                                                                                                                                                                                                      |                                                                                          |                                                                                                    |                                             | Pregnancy, birth and puerperium       | Breastfeeding | Sd                 | Dc, Ml     | Or |
|                                                                                                                                                                                                                                                                                                      |                                                                                          |                                                                                                    | Skin and subcutaneous tissue                | Acne                                  | Sd            | Dc                 | Bt         | 1  |
|                                                                                                                                                                                                                                                                                                      |                                                                                          |                                                                                                    | Reproductive system and reproductive health | Menopause                             | Ro            | Dc                 | Or         | 1  |
|                                                                                                                                                                                                                                                                                                      |                                                                                          |                                                                                                    | Pregnancy, birth and puerperium             | Birth                                 | Ro            | Ddc, Fs, If, Ml    | Or         | 1  |
|                                                                                                                                                                                                                                                                                                      |                                                                                          |                                                                                                    | Pregnancy, birth and puerperium             | Birth                                 | Lf            | If                 | Or         | 1  |
|                                                                                                                                                                                                                                                                                                      |                                                                                          |                                                                                                    | Digestive system                            | Stomach cramps                        | Lf            | If                 | Or         | 1  |
|                                                                                                                                                                                                                                                                                                      |                                                                                          |                                                                                                    |                                             | Diarrhoea                             | Lf            | Or                 | Or         | 1  |
|                                                                                                                                                                                                                                                                                                      |                                                                                          |                                                                                                    |                                             | Laxative                              | Lf            | If                 | Or         | 1  |
|                                                                                                                                                                                                                                                                                                      |                                                                                          |                                                                                                    | General ailments with unspecific symptoms   | Fever                                 | Lf            | If                 | Or         | 1  |
|                                                                                                                                                                                                                                                                                                      |                                                                                          |                                                                                                    | Blood and cardio-vascular system            | High pressure                         | Lf            | If                 | Or         | 2  |
|                                                                                                                                                                                                                                                                                                      |                                                                                          |                                                                                                    | Nervous system and mental health            | Insomnia                              | Lf            | If                 | Or         | 2  |
|                                                                                                                                                                                                                                                                                                      |                                                                                          |                                                                                                    | Reproductive system and reproductive health | Menstruation disorders                | Lf            | If                 | Or         | 2  |
|                                                                                                                                                                                                                                                                                                      |                                                                                          |                                                                                                    |                                             | Menopause                             | Ep            | If                 | Or         | 1  |
|                                                                                                                                                                                                                                                                                                      |                                                                                          |                                                                                                    | Respiratory system                          | Flu                                   | Lf            | If                 | Or         | 1  |
|                                                                                                                                                                                                                                                                                                      |                                                                                          |                                                                                                    |                                             | Couh                                  | Lf            | If                 | Or         | 1  |
|                                                                                                                                                                                                                                                                                                      |                                                                                          |                                                                                                    | Blood and cardio-vascular system            | Hemorrhoids                           | Lf            | Ffs                | Bt         | 1  |
|                                                                                                                                                                                                                                                                                                      |                                                                                          |                                                                                                    | Urinary system                              | Prostate disorders                    | Lf            | If                 | Or         | 1  |
|                                                                                                                                                                                                                                                                                                      |                                                                                          |                                                                                                    | Metabolic system and nutrition              | Weight loss                           | Sd            | Dc                 | Or         | 1  |
|                                                                                                                                                                                                                                                                                                      |                                                                                          |                                                                                                    | Urinary system                              | Prostate disorders                    | Sd            | Dc                 | Or         | 1  |
|                                                                                                                                                                                                                                                                                                      |                                                                                          |                                                                                                    |                                             | Kidney disorders, emollient, diuretic | Lf, Sd        | Dc, If             | Or         | 28 |



|                                                           |                                          |            |                                             |                                       |            |                 |                |    |
|-----------------------------------------------------------|------------------------------------------|------------|---------------------------------------------|---------------------------------------|------------|-----------------|----------------|----|
| <i>Oryza sativa</i> L. (FC862)                            | Arroz                                    | Cultivated | Digestive system                            | Diarrhoea                             | Fr         | Dc, If, Wm      | Or             | 5  |
|                                                           |                                          |            | Other uses                                  | Hair loss                             | Sd         | Fs              | Pl             | 1  |
|                                                           |                                          |            | Other uses                                  | Hair loss                             | Bd, Lf, St | Ddc, Fs, If, Ml | Bt, Or         | 3  |
| <i>Phragmites australis</i> (Cav.) Trin. ex Stend (FC865) | Carricillo, carrizo, timbuche            | Wild       | Urinary system                              | Prostate disorders                    | Bk         | Dc              | Or             | 1  |
|                                                           |                                          |            | Endocrine system                            | Diabetes                              | Bk         | Dc              | Or             | 1  |
|                                                           |                                          |            | Respiratory system                          | Flu                                   | St         | Fm              | Pl             | 1  |
| <i>Saccharum officinarum</i> L. (FC864)                   | Caña de azúcar                           | Cultivated | Insect bite                                 | Fr                                    | Fm         | Or              | 1              |    |
|                                                           |                                          |            | Infections and infestations                 | UTA, leishmaniasis                    | St         | Fm              | Bt             | 1  |
|                                                           |                                          |            | Infections and infestations                 | Chickenpox                            | Fr         | Dc, Fs, If, Ml  | Bt, Kn, Or, Pl | 69 |
|                                                           |                                          |            | Pregnancy, birth and puerperium             | Breastfeeding                         | Fr         | Dc, If, Ml, Wm  | Bt, Or         | 8  |
|                                                           |                                          |            | Digestive system                            | Intestinal parasites                  | Fr         | Ml              | Pl             | 1  |
|                                                           |                                          |            |                                             | Stomach cramps                        | Ss         | If              | Or             | 1  |
|                                                           |                                          |            |                                             | Antimonia, gentil, viejo, antiguo     | Fr         | Ddc, Fs, If, Ml | Bt, Pl         | 5  |
|                                                           |                                          |            | Cultural diseases and disorders             | Susto, espanto                        | Fr         | Dd, Ml          | Bt, Kn, Or, Pl | 6  |
|                                                           |                                          |            |                                             | Tijte                                 | Ss         | Wm              | Bt             | 1  |
|                                                           |                                          |            | Blood and cardio-vascular system            | High pressure                         | Fr         | Dc, Ml          | Or             | 7  |
| <i>Zea mays</i> L. (FC870)                                | Maíz                                     | Cultivated |                                             | Anemia                                | Fr         | Ml              | Or             | 1  |
|                                                           |                                          |            | Skin and subcutaneous tissue                | Burns                                 | Fr         | If              | Or             | 1  |
|                                                           |                                          |            | Reproductive system and reproductive health | Menopause                             | Fr         | Dc              | Or             | 1  |
|                                                           |                                          |            |                                             | Kidney disorders, emollient, diuretic | Ss         | Ddc, Fs, If, Ml | Or             | 7  |
|                                                           |                                          |            | Urinary system                              | Prostate disorders                    | Ss         | If              | Or             | 1  |
|                                                           |                                          |            | <b>Polygalaceae</b>                         |                                       |            |                 |                |    |
|                                                           |                                          |            | Digestive system                            | Stomach cramps                        | Lf         | If              | Or             | 2  |
| <i>Polygala paniculata</i> L. (FC871)                     | Canchalagua                              | Wild       | Skin and subcutaneous tissue                | Acne                                  | Lf         | Dc              | Or             | 1  |
|                                                           |                                          |            | <b>Polygonaceae</b>                         |                                       |            |                 |                |    |
| <i>Polygonum hydropiperoides</i> Michx. (FC873)           | Shiñachirapa                             | Wild       | Cultural diseases and disorders             | Antimonia, gentil, viejo, antiguo     | Lf         | If              | Bt             | 1  |
|                                                           |                                          |            | General ailments with unspecific symptoms   | Fever                                 | Lf, Ro     | Dc, If          | Or             | 2  |
|                                                           |                                          |            | Infections and infestations                 | Insect bite                           | Lf         | Ml              | Kn             | 1  |
| <i>Rumex obtusifolius</i> L. (FC872)                      | Malayerba, hierbamaría                   | Wild       | Urinary system                              | Kidney disorders, emollient, diuretic | Lf         | If              | Or             | 1  |
|                                                           |                                          |            |                                             | Intestinal parasites                  | Ro         | Ml              | Or             | 1  |
|                                                           |                                          |            | Digestive system                            | Hepatitis                             | Lf, Ro     | If, Ml          | Or             | 2  |
|                                                           |                                          |            |                                             | Laxative                              | Lf, Ro     | If              | Or             | 4  |
| <i>Rumex peruanus</i> Rech. f. (FC874)                    | Canchil, unduluj, undulón                | Wild       | Skin and subcutaneous tissue                | Burns                                 | Ro         | Fs              | Pl             | 1  |
|                                                           |                                          |            | Other uses                                  | Cancer                                | St         | If              | Pl             | 1  |
| <i>Portulaca oleraceae</i> L.                             | Verdolaga                                | Wild       | Sensory system                              | Hearing disorders                     | Lf         | Fs              | Pl             | 1  |
|                                                           |                                          |            | Other uses                                  | Cancer                                | Fl         | Dc              | Or             | 1  |
| <i>Oreocallis grandiflora</i> (Lam.) R.Br. (FC875)        | Saltaperico, palpal, avincho, rumilanche | Wild       | Dental health                               | Toothache                             | Sd         | Ml              | Or             | 1  |
|                                                           |                                          |            | Blood and cardio-vascular system            | Hemorrhoids                           | Fl, Lf     | Dc              | Or             | 2  |
|                                                           |                                          |            | Digestive system                            | Stomach cramps                        | Lf         | If              | Or             | 1  |

|                                              |                                       |            |                                             |                                                             |        |            |         |    |
|----------------------------------------------|---------------------------------------|------------|---------------------------------------------|-------------------------------------------------------------|--------|------------|---------|----|
|                                              |                                       |            | Urinary system                              | Prostate disorders<br>Kidney disorders, emollient, diuretic | Lf     | If         | Or      | 2  |
|                                              |                                       |            |                                             |                                                             | Fl, Lf | Dc, If     | Or      | 7  |
|                                              |                                       |            | <b>Ranunculaceae</b>                        |                                                             |        |            |         |    |
| <i>Clematis haenkeana</i> C. Presl (FC876)   | Pumashaire, sajshaur                  | Wild       | Infections and infestations                 | UTA, leishmaniasis                                          | Lf     | ML, Wm     | Pl      | 2  |
|                                              |                                       |            | <b>Rosaceae</b>                             |                                                             |        |            |         |    |
| <i>Cydonia oblonga</i> Mill. (FC879)         | Membrillo                             | Cultivated | Digestive system                            | Diarrhoea                                                   | Fr     | If         | Or      | 1  |
|                                              |                                       |            | Endocrine system                            | Diabetes                                                    | Fr     | Dc         | Or      | 1  |
| <i>Filipendula ulmaria</i> (L.) Maxim.       | Reina Isabel                          | Wild       | Infections and infestations                 | UTA, leishmaniasis                                          | Fl, Lf | Fs, If     | Or, Pl  | 2  |
| <i>Fragaria × ananassa</i> (Weston) Duchesne | Fresa                                 | Wild       | Urinary system                              | Kidney disorders, emollient, diuretic                       | Fr     | Fs         | Or      | 1  |
|                                              |                                       |            | Blood and cardio-vascular system            | Anemia                                                      | Fr     | ML         | Or      | 5  |
|                                              |                                       |            |                                             | Diarrhoea                                                   | Fr     | Dc, If     | Or      | 3  |
|                                              |                                       |            | Digestive system                            | Stomach pain                                                | Fr     | Fs         | Or      | 1  |
|                                              |                                       |            |                                             | Indigestive                                                 | Fr     | Fs         | Or      | 7  |
|                                              |                                       |            |                                             | Bad breath                                                  | Fr     | Fs         | Or      | 1  |
|                                              |                                       |            | Endocrine system                            | Diabetes                                                    | Fr     | Fs         | Or      | 1  |
|                                              |                                       |            |                                             | Mental stimulant                                            | Fr     | Fs         | Or      | 2  |
| <i>Malus domestica</i> Borkh. (FC878)        | Manzana serrana, manazanita de huerta | Cultivated | Nervous system and mental health            | Stress                                                      | Fr     | If         | Or      | 2  |
|                                              |                                       |            |                                             | Insomnia                                                    | Fr, Lf | Dc, If     | Or      | 96 |
|                                              |                                       |            |                                             | Sadness                                                     | Fr     | Dc         | Or      | 1  |
|                                              |                                       |            | Skin and subcutaneous tissue                | Acne                                                        | Fr     | Fs         | Or      | 1  |
|                                              |                                       |            | Pregnancy, birth and puerperium             | Birth                                                       | Fr     | Dc         | Or      | 1  |
|                                              |                                       |            | Dental health                               | Toothache                                                   | Fr     | Fs         | Or      | 2  |
|                                              |                                       |            | Metabolic system and nutrition              | Weight loss                                                 | Fr     | Dc         | Or      | 1  |
| <i>Potentilla anserina</i> L.                | Potentila                             | Wild       | Nervous system and mental health            | Epilepsy                                                    | Eep    | Dc         | Or      | 1  |
| <i>Prunus dulcis</i> (Mill.) D.A. Webb       | Almendra                              | Cultivated | Blood and cardio-vascular system            | Anemia                                                      | Fr     | Fs         | Or      | 1  |
|                                              |                                       |            | Cultural diseases and disorders             | Aire, malaire                                               | Lf     | Dc, Fs, If | Bt, Or  | 11 |
|                                              |                                       |            |                                             | Susto, espanto                                              | Lf     | Fs         | Bt      | 2  |
|                                              |                                       |            | Digestive system                            | Diarrhoea                                                   | Lf     | If         | Or      | 2  |
| <i>Prunus persica</i> (L.) Batsch (FC877)    | Durazno                               | Cultivated | General ailments with unspecific symptoms   | Fever                                                       | Lf     | Dc, Fs, If | Bt      | 5  |
|                                              |                                       |            |                                             | Insomnia                                                    | Lf     | If         | Or      | 1  |
|                                              |                                       |            | Nervous system and mental health            | Sadness                                                     | Lf     | If         | Or      | 1  |
|                                              |                                       |            |                                             | Mental stimulant                                            | Fr     | Fs         | Or      | 2  |
|                                              |                                       |            | Pregnancy, birth and puerperium             | Postpartum                                                  | Lf     | Ddc, If    | Bt, Pl  | 8  |
|                                              |                                       |            |                                             | Birth                                                       | Lf     | If         | Bt      | 1  |
| <i>Prunus serotina</i> Ehrh.                 | Capulí                                | Wild       | Infections and infestations                 | UTA, leishmaniasis                                          | Lf     | Fs         | Pl      | 1  |
|                                              |                                       |            | Reproductive system and reproductive health | Menopause                                                   | St     | If         | Or      | 1  |
| <i>Pyrus</i> sp.                             | Pera                                  | Cultivated | Digestive system                            | Indigestive                                                 | Fr     | Fs         | Or      | 1  |
| <i>Rosa centifolia</i> L. (FC881)            | Rosa, rosa blanca                     | Cultivated | Nervous system and mental health            | Sadness                                                     | Fl     | If         | Or      | 1  |
|                                              |                                       |            | Sensory system                              | Visual disorders                                            | Fl     | Fs, ML     | Bt, Kn  | 3  |
|                                              |                                       |            | Sensory system                              | Visual disorders                                            | Fl     | If         | Bbt, Or | 2  |
|                                              |                                       |            | Endocrine system                            | Diabetes                                                    | Lf     | If         | Or      | 2  |
| <i>Rubus megalococcus</i> Focke (FC880)      | Mora                                  | Wild       | Reproductive system and reproductive health | Menstruation disorders                                      | Fr     | Dc         | Or      | 1  |
|                                              |                                       |            | Respiratory system                          | Flu                                                         | Fl, Lf | Dc, If     | Or      | 3  |
|                                              |                                       |            |                                             | Cough                                                       | Fl     | If         | Or      | 2  |
|                                              |                                       |            | <b>Rubiaceae</b>                            |                                                             |        |            |         |    |

|                                                            |                   |            |                                             |                                       |         |                |                    |    |
|------------------------------------------------------------|-------------------|------------|---------------------------------------------|---------------------------------------|---------|----------------|--------------------|----|
| <i>Cinchona krauseana</i> L. Andersson (FC885)             | Tafitán           | Wild       | Muscular-skeletal system                    | Joint sprains                         | Lf      | Fs             | Pl                 | 1  |
| <i>Cinchona officinalis</i> L. (FC884)                     | Cascarilla, quina | Wild       | Cultural diseases and disorders             | Antimonia, gentil, viejo, antiguo     | Lf      | Fm             | Or                 | 1  |
|                                                            |                   |            | Infections and infestations                 | Malaria                               | Bk, Lf  | Dc, Fm, If     | Or                 | 3  |
|                                                            |                   |            | Blood and cardio-vascular system            | Low pressure                          | Fr, Sd  | Dc, If         | Or                 | 34 |
|                                                            |                   |            | Reproductive system and reproductive health | Menstruation disorders                | Lf      | Dc             | Or                 | 1  |
| <i>Coffea arabica</i> L. (FC882)                           | Café              | Cultivated | Metabolic system and nutrition              | Weight loss                           | Fr      | If             | Or                 | 1  |
|                                                            |                   |            | Muscular-skeletal system                    | Rheumatism                            | Lf      | Fm             | Kn                 | 1  |
|                                                            |                   |            | Pregnancy, birth and puerperium             | Breastfeeding                         | Bd      | If             | Or                 | 1  |
|                                                            |                   |            | Respiratory system                          | Cough                                 | Ffr     | If             | Or                 | 1  |
|                                                            |                   |            | Other uses                                  | Cancer                                | Fr      | Fs, Jc, MI     | Or                 | 5  |
|                                                            |                   |            | Digestive system                            | Diarrhoea                             | Fr      | MI             | Or                 | 2  |
| <i>Morinda citrifolia</i> L. (FC883)                       | Noni              | Cultivated | Prostate disorders                          | Prostate disorders                    | Fr      | Jc             | Or                 | 1  |
|                                                            |                   |            | Urinary system                              | Kidney disorders, emollient, diuretic | Lf      | If             | Or                 | 1  |
|                                                            |                   |            | Other uses                                  | Cancer                                | Lf, St  | Dc, If         | Or                 | 3  |
|                                                            |                   |            | Digestive system                            | Diarrhoea                             | Bk      | Dc             | Or                 | 1  |
|                                                            |                   |            | Reproductive system and reproductive health | Fertility                             | Ep      | Fm             | Or                 | 1  |
|                                                            |                   |            | Reproductive system and reproductive health | Aphrodisiac                           | Bk      | If             | Or                 | 1  |
| <i>Uncaria tomentosa</i> (Willd. ex Schult.) DC. (FC886)   | Uña de gato       | Wild       | Skin and subcutaneous tissue                | Feet fungus                           | Bk      | Dc             | Bt                 | 1  |
|                                                            |                   |            | Urinary system                              | Kidney disorders, emollient, diuretic | Ep, Lf  | Dc             | Or                 | 3  |
|                                                            |                   |            | Urinary system                              | Prostate disorders                    | Bk      | Dc, Fm         | Or                 | 2  |
|                                                            |                   |            | <b>Rutaceae</b>                             |                                       |         |                |                    |    |
| <i>Citrus aurantiifolia</i> (Christm.) Swingle (FC887)     | Lima              | Cultivated | Blood and cardio-vascular system            | High pressure                         | Fl, Ffr | Fs, If, Jc, MI | Or                 | 23 |
|                                                            |                   |            | Cultural diseases and disorders             | Susto, espanto                        | Ffr     | Jc             | Or                 | 1  |
|                                                            |                   |            | Digestive system                            | Hepatitis                             | Fl, Ffr | Fs, If         | Or                 | 2  |
|                                                            |                   |            | General ailments with unspecific symptoms   | Fever                                 | Fr, Lf  | Dc, Jc         | Bt, Or             | 2  |
|                                                            |                   |            | Respiratory system                          | Flu                                   | Fr      | Fs             | Or                 | 1  |
|                                                            |                   |            | Nervous system and mental health            | Sadness                               | Fr      | Fs             | Or                 | 1  |
|                                                            |                   |            | Mental stimulant                            | Mental stimulant                      | Fr      | Fs             | Or                 | 1  |
|                                                            |                   |            | Endocrine system                            | Diabetes                              | Fr      | Fs             | Or                 | 1  |
|                                                            |                   |            | Skin and subcutaneous tissue                | Burns                                 | Fr      | MI             | Bt                 | 1  |
|                                                            |                   |            | Sensory system                              | Visual disorders                      | Fr      | Fs, Jc, MI     | Bt, Ew, Kn, Or, Pl | 26 |
| <i>Citrus aurantium</i> L. var. <i>amara</i> L. (FC891)    | Naranjo           | Cultivated | Pregnancy, birth and puerperium             | Birth                                 | Lf      | If             | Or                 | 1  |
|                                                            |                   |            | Nervous system and mental health            | Insomnia                              | Bd, Lf  | If             | Or                 | 2  |
|                                                            |                   |            | Reproductive system and reproductive health | Menopause                             | Lf      | If             | Or                 | 1  |
| <i>Citrus aurantium</i> L. var. <i>sinensis</i> L. (FC890) | Naranja           | Cultivated | General ailments with unspecific symptoms   | Fever                                 | Lf      | Fm             | Kn                 | 1  |
|                                                            |                   |            | Pregnancy, birth and puerperium             | Birth                                 | Ec, Fr  | Fs, If         | Or                 | 2  |

|                                            |                    |            |                                             |                        |        |                    |                |    |
|--------------------------------------------|--------------------|------------|---------------------------------------------|------------------------|--------|--------------------|----------------|----|
| <i>Citrus limon</i> (L.) Osbeck<br>(FC888) | Limón, limón ácido | Cultivated |                                             | Intestinal parasites   | Fr     | Jc                 | Or             | 1  |
|                                            |                    |            | Digestive system                            | Laxative               | Fr, Sd | Dc, Jc, MI         | Or             | 5  |
|                                            |                    |            |                                             | Diarrhoea              | Ffr    | Fs, Jc             | Or             | 2  |
|                                            |                    |            | Blood and cardio-vascular system            | High pressure          | Fr     | Dc, Fs, If         | Or             | 4  |
|                                            |                    |            |                                             | Anemia                 | Fr     | MI                 | Or             | 1  |
|                                            |                    |            | Respiratory system                          | Flu                    | Fr     | Dc, Fs, If, Jc     | Or             | 32 |
|                                            |                    |            | Muscular-skeletal system                    | Muscle cramps          | Fr     | Fs                 | Or             | 1  |
|                                            |                    |            | Nervous system and mental health            | Insomnia               | Fr, Lf | Fs, If, Jc         | Or             | 3  |
|                                            |                    |            |                                             | Mental stimulant       | Fr     | Fs                 | Or             | 3  |
|                                            |                    |            |                                             | Sadness                | Lf     | If                 | Or             | 1  |
|                                            |                    |            |                                             | Feet fungus            | Fr     | Fs, Jc, MI, Wm     | Bt, Kn, Or, Pl | 13 |
|                                            |                    |            | Skin and subcutaneous tissue                | Wounds, healing        | Fr     | Fs, Jc             | Bt             | 3  |
|                                            |                    |            |                                             | Acne                   | Fr     | Fs, If, Jc         | Bt, Or         | 5  |
|                                            |                    |            |                                             | Burns                  | Ec, Fr | Fs, If             | Bt, Kn, Or, Pl | 5  |
|                                            |                    |            | Endocrine system                            | Diabetes               | Fr     | Fs                 | Or             | 1  |
|                                            |                    |            | Nervous system and mental health            | Insomnia               | Ffr    | If                 | Or             | 1  |
|                                            |                    |            |                                             | Intestinal parasites   | Ssd    | MI                 | Or             | 1  |
|                                            |                    |            |                                             | Stomach cramps         | Fr     | If                 | Or             | 1  |
|                                            |                    |            | Digestive system                            | Diarrhoea              | Fr     | If, Jc, Wm         | Or             | 11 |
|                                            |                    |            |                                             | Stomach pain           | Fr     | If                 | Or             | 1  |
|                                            |                    |            |                                             | Hepatitis              | Fr     | Jc                 | Or             | 1  |
|                                            |                    |            |                                             | Laxative               | Ssd    | MI                 | Or             | 1  |
|                                            |                    |            | General ailments with unspecific symptoms   | Fever                  | Fr     | Dc, Fs, If, Jc, MI | Bt, Or, Pl     | 10 |
|                                            |                    |            |                                             | General malaise        | Fr     | Jc                 | Or             | 1  |
|                                            |                    |            | Infections and infestations                 | Insect bite            | Fr     | Fs, Jc, MI         | Bbt, Or, Pl    | 18 |
|                                            |                    |            |                                             | UTA, leishmaniasis     | Fr     | Fs, Jc             | Bt             | 2  |
|                                            |                    |            | Metabolic system and nutrition              | Weight loss            | Fr     | If, Jc             | Or             | 6  |
|                                            |                    |            | Muscular-skeletal system                    | Rheumatism             | Lf     | Fm                 | Kn             | 1  |
|                                            |                    |            |                                             | Cavity                 | Sd     | Fs                 | Pl             | 2  |
|                                            |                    |            | Dental health                               | Toothache              | Fr, Sd | Fs, MI             | Bt, Kn, Or, Pl | 13 |
|                                            |                    |            | Pregnancy, birth and puerperium             | Postpartum             | Fr     | If                 | Or             | 1  |
|                                            |                    |            | Reproductive system and reproductive health | Menstruation disorders | Fr     | Fs, If             | Bt, Or         | 2  |
|                                            |                    |            | Respiratory system                          | Flu                    | Fr, Lf | Dc, Fs, If, Jc, Wm | Or             | 59 |
|                                            |                    |            |                                             | Cough                  | Fr     | If, Jc             | Gg, Or         | 4  |
|                                            |                    |            | Sensory system                              | Visual disorders       | Fr     | Fs, MI             | Bt, Kn         | 2  |
|                                            |                    |            | Ritual and magic uses                       | Negative vibes         | Fr     | Fs                 | Nn             | 2  |
|                                            |                    |            | Metabolic system and nutrition              | Weight loss            | Fr     | Jc                 | Or             | 2  |
| <i>Citrus paradisi</i> Macfad.<br>(FC893)  | Toronja            | Cultivated | Blood and cardio-vascular system            | High pressure          | Fr     | Jc                 | Or             | 1  |
|                                            |                    |            | Reproductive system and reproductive health | Fertility              | Fr     | If, Jc             | Or             | 1  |
| <i>Citrus reticulata</i> Blanco<br>(FC889) | Mandarina          | Cultivated | Respiratory system                          | Flu                    | Fr     | Fs                 | Or             | 2  |
|                                            |                    |            | Nervous system and mental health            | Mental stimulant       | Fr     | Fs                 | Or             | 1  |
| <i>Ruta chalepensis</i> L. (FC892)         | Ruda               | Cultivated | Dental health                               | Toothache              | Lf     | MI                 | Kn, Or, Pl     | 4  |
|                                            |                    |            | Cultural diseases and disorders             | Aire, malaire          | Lf     | Fs, If             | Bt, In, Or     | 42 |

|  |  |  |  |  |                                              |                                         |                   |                       |                   |    |
|--|--|--|--|--|----------------------------------------------|-----------------------------------------|-------------------|-----------------------|-------------------|----|
|  |  |  |  |  |                                              | Antimonia,<br>gentil, viejo,<br>antiguo | Lf                | Ffs                   | Bt                | 1  |
|  |  |  |  |  |                                              | Susto, espanto                          | Lf                | Fs, If                | Bt, Or            | 10 |
|  |  |  |  |  |                                              | Tacsho                                  | Lf                | If                    | Bt, Or            | 3  |
|  |  |  |  |  | Digestive system                             | Intestinal<br>parasites                 | Lf                | MI                    | Or                | 1  |
|  |  |  |  |  |                                              | Stomach cramps                          | Lf                | If                    | Or                | 4  |
|  |  |  |  |  | Sensory system                               | Hearing<br>disorders                    | Lf                | Fs, If                | Pl                | 2  |
|  |  |  |  |  | Infections and infestations                  | Chickenpox                              | Lf                | Dc                    | Bt                | 1  |
|  |  |  |  |  | Muscular-skeletal system                     | Rheumatism                              | Lf                | Fm, If                | Bt                | 2  |
|  |  |  |  |  | Pregnancy, birth and<br>puerperium           | Abortive                                | Ap, Ep,<br>Lf     | Dc, Fm,<br>Fs, If, MI | Or                | 19 |
|  |  |  |  |  |                                              | Postpartum                              | Lf                | If                    | Bt, Or            | 2  |
|  |  |  |  |  | General ailments with<br>unspecific symptoms | Fever                                   | Lf                | Fm                    | Kn                | 1  |
|  |  |  |  |  |                                              | Headache                                | Ep                | Fs                    | Bt                | 1  |
|  |  |  |  |  | Ritual and magic uses                        | Curse                                   | Lf                | MI                    | Bt                | 1  |
|  |  |  |  |  |                                              | Bring good luck                         | Ap, Ep,<br>Fl, Lf | Ddc, Fs,<br>If, MI    | Bt, Kn,<br>Nn     | 14 |
|  |  |  |  |  |                                              | Negative vibes                          | Ep, Lf            | Fs, If                | Bt, Nn            | 6  |
|  |  |  |  |  | <b>Salicaceae</b>                            |                                         |                   |                       |                   |    |
|  |  |  |  |  | Blood and cardio-vascular<br>system          | Low pressure                            | Lf                | If                    | Or                | 1  |
|  |  |  |  |  | Other uses                                   | Hair loss                               | Lf                | Dc, Fm,<br>Fs, If     | Bt                | 13 |
|  |  |  |  |  |                                              | Rheumatism                              | Lf                | Dc                    | Bt                | 1  |
|  |  |  |  |  | <b>Santalaceae</b>                           |                                         |                   |                       |                   |    |
|  |  |  |  |  | Muscular-skeletal system                     | Hernia                                  | Lf                | MI                    | Pl                | 1  |
|  |  |  |  |  |                                              | Rheumatism                              | Lf                | Fs                    | Bt                | 1  |
|  |  |  |  |  |                                              | Joint sprains                           | Lf                | Fs, If,<br>MI, Wm     | Bt, Pl            | 26 |
|  |  |  |  |  | <b>Sapindaceae</b>                           |                                         |                   |                       |                   |    |
|  |  |  |  |  | Cultural diseases and<br>disorders           | Susto, espanto                          | Lf                | If                    | Bt                | 2  |
|  |  |  |  |  | Infections and infestations                  | Chickenpox                              | Lf                | If                    | Bt                | 1  |
|  |  |  |  |  |                                              | Rheumatism                              | Lf                | Dc                    | Bt                | 1  |
|  |  |  |  |  | Muscular-skeletal system                     | Joint sprains                           | Lf                | Wm                    | Ppl               | 1  |
|  |  |  |  |  |                                              | Burns                                   | Lf                | MI                    | Pl                | 1  |
|  |  |  |  |  | Infections and infestations                  | Fleas                                   | Sd                | Dc                    | Bt                | 1  |
|  |  |  |  |  | <b>Sapotaceae</b>                            |                                         |                   |                       |                   |    |
|  |  |  |  |  | Pregnancy, birth and<br>puerperium           | Breastfeeding                           | Bd, Lf            | Dc, If                | Or                | 7  |
|  |  |  |  |  | <b>Scrophulariaceae</b>                      |                                         |                   |                       |                   |    |
|  |  |  |  |  | Infections and infestations                  | UTA,<br>leishmaniasis                   | Lx                | Fs                    | Pl                | 1  |
|  |  |  |  |  | Pregnancy, birth and<br>puerperium           | Bi                                      | Lf                | If                    | Or                | 1  |
|  |  |  |  |  | Infections and infestations                  | UTA,<br>leishmaniasis                   | Lf                | MI                    | Pl                | 2  |
|  |  |  |  |  | <b>Siparunaceae</b>                          |                                         |                   |                       |                   |    |
|  |  |  |  |  | Cultural diseases and<br>disorders           | Antimonia,<br>gentil, viejo,<br>antiguo | Lf                | If                    | Bt                | 1  |
|  |  |  |  |  |                                              | Susto, espanto                          | Lf                | If                    | Bt                | 2  |
|  |  |  |  |  | Pregnancy, birth and<br>puerperium           | Postpartum                              | Lf                | If                    | Bt                | 1  |
|  |  |  |  |  | <b>Solanaceae</b>                            |                                         |                   |                       |                   |    |
|  |  |  |  |  | Digestive system                             | Stomach cramps                          | Fr                | Wm                    | Or                | 1  |
|  |  |  |  |  | General ailments with<br>unspecific symptoms | Fever                                   | Lf                | If                    | Bt                | 2  |
|  |  |  |  |  | Pregnancy, birth and<br>puerperium           | Postpartum                              | Lf                | Fs, If, MI            | Bt, Kn,<br>Or     | 58 |
|  |  |  |  |  |                                              | Burns                                   | Fr, Lf            | Fs, If,<br>Mml        | Bt, Kn,<br>Or, Pl | 14 |

|                                                |                                                      |            |                                             |                                   |        |                 |            |    |
|------------------------------------------------|------------------------------------------------------|------------|---------------------------------------------|-----------------------------------|--------|-----------------|------------|----|
| <i>Cestrum auriculatum</i> L'Hér<br>(FC907)    | Hierbasanta                                          | Wild       |                                             | Feet fungus                       | Fr     | Fs              | Kn         | 1  |
|                                                |                                                      |            | Cultural diseases and disorders             | Susto, espanto                    | Lf     | Dc, If          | Bt         | 2  |
|                                                |                                                      |            | Digestive system                            | Intestinal parasites              | Lf     | If              | Or         | 1  |
|                                                |                                                      |            |                                             | Diarrhoea                         | Lf     | MI              | Or         | 1  |
|                                                |                                                      |            | General ailments with unspecific symptoms   | Fever                             | Ep, Lf | Dc, If, MI      | Bt, Or, Pl | 32 |
|                                                |                                                      |            |                                             | General malaise                   | Lf     | If              | Bt         | 1  |
|                                                |                                                      |            | Pregnancy, birth and puerperium             | Abortive                          | Lf     | Fm              | Or         | 1  |
|                                                |                                                      |            |                                             | Postpartum                        | Lf     | If              | Bt         | 1  |
|                                                |                                                      |            | Infections and infestations                 | Chickenpox                        | Lf     | If              | Bt         | 1  |
|                                                |                                                      |            |                                             | Lice                              | Lf     | Dc              | Bt         | 1  |
|                                                |                                                      |            | Urinary system                              | Prostate disorders                | Lf     | If              | Bt         | 1  |
|                                                |                                                      |            | Reproductive system and reproductive health | Menstruation disorders            | Ro     | Dc              | Or         | 2  |
|                                                |                                                      |            | Skin and subcutaneous tissue                | Wounds, healing                   | Lf     | Dc, If          | Bt         | 2  |
|                                                |                                                      |            |                                             | Feet fungus                       | Lf     | Dc              | Bt         | 1  |
| <i>Cestrum tomentosum</i> L. f.<br>(FC908)     | Huaspasacha de la jalca                              | Wild       | Digestive system                            | Stomach cramps                    | Lf     | If              | Or         | 2  |
|                                                |                                                      |            | Reproductive system and reproductive health | Menstruation disorders            | Lf     | If              | Or         | 1  |
|                                                |                                                      |            |                                             |                                   |        |                 |            |    |
| <i>Cyphomandra betacea</i> Cav.<br>(FC913)     | Tomate de árbol, pepino de árbol, berenjena de árbol | Cultivated | Blood and cardio-vascular system            | High pressure                     | Fr     | Fs, Jc, MI      | Or         | 6  |
|                                                |                                                      |            |                                             | Hemorrhoids                       | Fr     | MI              | Kn         | 1  |
|                                                |                                                      |            | Endocrine system                            | Diabetes                          | Fr     | Fs, MI          | Or         | 4  |
|                                                |                                                      |            | Metabolic system and nutrition              | Weight loss                       | Fr     | Fs, If, Jc, Mml | Or         | 13 |
|                                                |                                                      |            | Infections and infestations                 | Malaria                           | Fr     | Fs              | Or         | 1  |
|                                                |                                                      |            | Digestive system                            | Diarrhoea                         | Fr     | Fs              | Or         | 1  |
| <i>Datura stramonium</i> L. (FC904)            | Chamico, datura                                      | Wild       | Cultural diseases and disorders             | Susto, espanto                    | Lf     | If              | Bt         | 1  |
|                                                |                                                      |            | Blood and cardio-vascular system            | Hemorrhoids                       | Lf     | MI, Wm          | Pl         | 2  |
|                                                |                                                      |            | Ritual and magic uses                       | Curse                             | Lf     | Dc              | Bt         | 1  |
|                                                |                                                      |            |                                             | Susto, espanto                    | Lf     | Dd              | Bt         | 1  |
|                                                |                                                      |            | Cultural diseases and disorders             | Antimonia, gentil, viejo, antiguo | Lf     | Dd              | Bt         | 1  |
| <i>Nicotiana setchellii</i> Goodsp.<br>(FC911) | Tabaco                                               | Cultivated | Infections and infestations                 | UTA, leishmaniasis                | IF     | MI              | Pl         | 1  |
|                                                |                                                      |            | Blood and cardio-vascular system            | Hemorrhoids                       | Lf     | Wm              | Bt         | 1  |
|                                                |                                                      |            | Skin and subcutaneous tissue                | Swelling                          | Lf     | MI              | Pl         | 1  |
|                                                |                                                      |            | Sensory system                              | Hearing disorders                 | Lf     | MI              | Pl         | 1  |
|                                                |                                                      |            | Skin and subcutaneous tissue                | Burns                             | Lf     | If              | Pl         | 1  |
| <i>Physalis peruviana</i> L. (FC902)           | Aguaymanto, tomatillo                                | Wild       | General ailments with unspecific symptoms   | Fever                             | Lf     | Dc, Fs, If      | Bt         | 4  |
|                                                |                                                      |            |                                             | General malaise                   | Lf     | Dc              | Bt         | 1  |
|                                                |                                                      |            | Pregnancy, birth and puerperium             | Birth                             | Fr     | Jc              | Or         | 1  |
|                                                |                                                      |            |                                             | Postpartum                        | Lf     | Fs, If          | Bt         | 2  |
|                                                |                                                      |            | Digestive system                            | Diarrhoea                         | Lf     | If              | Or         | 1  |
|                                                |                                                      |            | Respiratory system                          | Flu                               | Fr     | Fm              | Or         | 1  |
|                                                |                                                      |            | Endocrine system                            | Diabetes                          | Fr     | Fs              | Or         | 1  |
|                                                |                                                      |            | General ailments with unspecific symptoms   | Fever                             | Lf     | If              | Bt         | 2  |
|                                                |                                                      |            |                                             | Visual disorders                  | Lf     | Dc              | Bt         | 1  |
|                                                |                                                      |            | Sensory system                              | Hearing disorders                 | Lf     | Fs              | Kn         | 1  |
| <i>Solanum americanum</i> Mill.<br>(FC906)     | Hierbamora, cuash                                    | Wild       | Infections and infestations                 | Fleas                             | Lf     | Dc              | Bt         | 1  |
|                                                |                                                      |            | Skin and subcutaneous tissue                | Feet fungus                       | Sd     | If              | Or         | 1  |
|                                                |                                                      |            |                                             |                                   |        |                 |            |    |
| <i>Solanum interandinum</i> Bitter<br>(FC909)  | Mushaño                                              | Wild       | General ailments with unspecific symptoms   | Fever                             | Lf     | Fs, If          | Bt         | 2  |

|                                                 |                                      |            |                                             |                                       |        |            |                |    |
|-------------------------------------------------|--------------------------------------|------------|---------------------------------------------|---------------------------------------|--------|------------|----------------|----|
| <i>Solanum lycopersicum</i> L. (FC912)          | Tomate                               | Cultivated | Pregnancy, birth and puerperium             | Postpartum                            | Lf     | If         | Or             | 1  |
|                                                 |                                      |            | General ailments with unspecific symptoms   | Fever                                 | Lf     | Fs, If     | Bt             | 2  |
|                                                 |                                      |            | Other uses                                  | Cancer                                | Fr     | Jc         | Or             | 1  |
|                                                 |                                      |            | Blood and cardio-vascular system            | Anemia                                | Fr     | MI         | Or             | 1  |
|                                                 |                                      |            | Sensory system                              | Visual disorders                      | Fr     | Fs         | Pl             | 1  |
| <i>Solanum quitoense</i> Lam. (FC905)           | Chila                                | Cultivated | Skin and subcutaneous tissue                | Burns                                 | Fr, Lf | Fs, If     | Bt, Kn, Or, Pl | 71 |
|                                                 |                                      |            |                                             | Acne                                  | Fr     | Fs         | Bt             | 1  |
|                                                 |                                      |            | Blood and cardio-vascular system            | High pressure                         | Fr     | If, Jc     | Or             | 2  |
|                                                 |                                      |            | Cultural diseases and disorders             | Susto, espanto                        | Lf     | If         | Bt             | 1  |
|                                                 |                                      |            | General ailments with unspecific symptoms   | Fever                                 | Ro     | Fs         | Kn, Pl         | 4  |
| <i>Solanum tuberosum</i> L. (FC910)             | Papa                                 | Cultivated |                                             | Headache                              | Ro     | Fs         | Kn, Pl         | 2  |
|                                                 |                                      |            |                                             | Stomach cramps                        | Ro     | If         | Or             | 2  |
|                                                 |                                      |            | Digestive system                            | Diarrhoea                             | Ro     | If, Jc, MI | Or             | 20 |
|                                                 |                                      |            |                                             | Gastric ulcers                        | Ro     | If, MI     | Or             | 6  |
|                                                 |                                      |            | Other uses                                  | Diabetes                              | Ro     | Dc, Rt     | Or             | 2  |
|                                                 |                                      |            | Infections and infestations                 | Chickenpox                            | Ro     | Rt         | Bt             | 1  |
|                                                 |                                      |            | Reproductive system and reproductive health | Menopause                             | Fr     | Dc         | Or             | 1  |
|                                                 |                                      |            | Sensory system                              | Hearing disorders                     | Ro     | Fs         | Pl             | 1  |
|                                                 |                                      |            | Skin and subcutaneous tissue                | Burns                                 | Ro     | If         | Or, Pl         | 2  |
|                                                 |                                      |            |                                             | Kidney disorders, emollient, diuretic | Ec, Ro | Dc, If     | Or             | 6  |
|                                                 |                                      |            | Urinary system                              | Prostate disorders                    | Ro     | Dc         | Or             | 1  |
| Theaceae                                        |                                      |            |                                             |                                       |        |            |                |    |
| <i>Camellia sinensis</i> (L.) Kuntze            | Té verde                             | Cultivated | Metabolic system and nutrition              | Weight loss                           | Lf     | If         | Or             | 4  |
| Tropaeolaceae                                   |                                      |            |                                             |                                       |        |            |                |    |
| <i>Tropaeolum majus</i> L. (FC914)              | Capuchina                            | Cultivated | Cultural diseases and disorders             | Tacsho                                | Lf     | Wwm        | Or             | 1  |
|                                                 |                                      |            |                                             | Aire, malaire                         | Lf     | Wm         | Bt             | 1  |
| <i>Tropaeolum tuberosum</i> Ruiz & Pav. (FC915) | Mashua                               | Cultivated | Skin and subcutaneous tissue                | Feet fungus                           | Lf     | MI         | Pl             | 1  |
|                                                 |                                      |            | Urinary system                              | Prostate disorders                    | Fr, Lf | If, MI     | Or             | 2  |
| Typhaceae                                       |                                      |            |                                             |                                       |        |            |                |    |
| <i>Typha angustifolia</i> L. ()                 | Chante                               | Wild       | Digestive system                            | Intestinal parasites                  | Lf     | MI         | Or             | 1  |
| Urticaceae                                      |                                      |            |                                             |                                       |        |            |                |    |
| <i>Pilea microphylla</i> (L.) Liebm. (FC916)    | Contrayerba, rumusol, quishquirinrri | Wild       | Muscular-skeletal system                    | Hernia                                | Lf     | MI         | Pl             | 1  |
|                                                 |                                      |            | Nervous system and mental health            | Sadness                               | Lf     | MI         | Or             | 1  |
|                                                 |                                      |            | Urinary system                              | Hearing disorders                     | Lf     | Wm         | Pl             | 1  |
|                                                 |                                      |            | Reproductive system and reproductive health | Menopause                             | Lf     | If         | Or             | 1  |
|                                                 |                                      |            | Other uses                                  | Hair loss                             | Lf     | Dc, MI     | Bt, Pl         | 3  |
|                                                 |                                      |            | Blood and cardio-vascular system            | High pressure                         | Lf     | MI         | Or             | 1  |
|                                                 |                                      |            |                                             | Hemorrhoids                           | Lf     | MI         | Or             | 2  |
| <i>Urtica urens</i> L. (FC917)                  | Ortiga, ortiga negra, ishanga negra  | Wild       | Digestive system                            | Stomach cramps                        | Lf     | MI         | Or             | 1  |
|                                                 |                                      |            | Muscular-skeletal system                    | Rheumatism                            | Lf     | Fs, If     | Bt, Or, Pl, Wh | 4  |
|                                                 |                                      |            | Urinary system                              | Kidney disorders, emollient, diuretic | Lf     | Dc         | Or             | 1  |

|                                          |                                  |             |                                             |                        |            |             |                |    |  |
|------------------------------------------|----------------------------------|-------------|---------------------------------------------|------------------------|------------|-------------|----------------|----|--|
| <i>Aloysia citriodora</i> Palau (FC918)  | Cedrón                           | Cultivated  | Reproductive system and reproductive health | Menstruation disorders | Ep, Lf, Ro | Dc, If, Mml | Or             | 23 |  |
|                                          |                                  |             |                                             | Menopause              | Ep         | If          | Or             | 1  |  |
|                                          |                                  |             | Verbenaceae                                 |                        |            |             |                |    |  |
|                                          |                                  |             | Other uses                                  | Hair loss              | Lf         | If          | Or             | 1  |  |
|                                          |                                  |             | Digestive system                            | Stomach infection      | Lf         | If          | Or             | 1  |  |
|                                          |                                  |             |                                             | Stomach cramps         | Lf         | If          | Or             | 1  |  |
|                                          |                                  |             |                                             | Diarrhoea              | Lf         | If          | Or             | 2  |  |
|                                          |                                  |             | Pregnancy, birth and puerperium             | Birth                  | Lf         | If          | Or             | 1  |  |
|                                          |                                  |             | Reproductive system and reproductive health | Menopause              | Lf         | If          | Or             | 1  |  |
|                                          |                                  |             | Fertility                                   | Sd                     | If         | Or          | 1              |    |  |
| <i>Lantana haughtii</i> Moldenke (FC919) | Sachaorégano                     | Wild        | Nervous system and mental health            | Insomnia               | Lf         | If          | Or             | 2  |  |
|                                          |                                  |             | Blood and cardio-vascular system            | High pressure          | Lf         | If          | Or             | 3  |  |
|                                          |                                  |             | Digestive system                            | Stomach cramps         | Lf         | Fm          | Or             | 1  |  |
|                                          |                                  |             | General ailments with unspecific symptoms   | Fever                  | Ep, Lf     | Dc, If, MI  | Bt, Or, Pl     | 25 |  |
|                                          |                                  |             | Headache                                    | Lf                     | Dc         | Bt          | 1              |    |  |
| <i>Verbena litoralis</i> Kunth (FC920)   | Verbena                          | Wild        | Pregnancy, birth and puerperium             | Abortive               | Lf         | Dc          | Or             | 1  |  |
|                                          |                                  |             |                                             | Intestinal parasites   | Ep         | MI          | Or             | 1  |  |
|                                          |                                  |             | Digestive system                            | Stomach cramps         | Lf         | If          | Or             | 2  |  |
|                                          |                                  |             |                                             | Hepatitis              | Lf         | Fs, If      | Or             | 4  |  |
|                                          |                                  |             |                                             | Gastric ulcers         | Lf         | If          | Or             | 1  |  |
|                                          |                                  |             | Respiratory system                          | Flu                    | Lf         | If          | Or             | 2  |  |
|                                          |                                  |             |                                             | Fleas                  | Lf         | Dc          | Bt             | 1  |  |
|                                          |                                  |             | Infections and infestations                 | Malaria                | Lf         | MI          | Or             | 1  |  |
|                                          |                                  |             |                                             | Insect bite            | Lf         | MI          | Kn             | 1  |  |
|                                          |                                  |             |                                             | Chickenpox             | Lf         | MI          | Or             | 1  |  |
|                                          |                                  |             | Other uses                                  | Hair loss              | Lf         | Dc          | Bt             | 1  |  |
|                                          |                                  |             | Endocrine system                            | Diabetes               | Lf         | If          | Or             | 1  |  |
|                                          |                                  |             | Violaceae                                   |                        |            |             |                |    |  |
| <i>Viola odorata</i> L. (FC921)          | Violeta                          | Cultivated  | Infections and infestations                 | UTA, leishmaniasis     | Fl         | Fs          | Pl             | 1  |  |
| Vitaceae                                 |                                  |             |                                             |                        |            |             |                |    |  |
| <i>Vitis vinifera</i> L. (FC922)         | Uva                              | Cultivated  |                                             | Indigestive            | Fr         | Fs          | Or             | 2  |  |
|                                          |                                  |             |                                             | Laxative               | Fr         | Ddd         | Or             | 1  |  |
|                                          |                                  |             | Digestive system                            | Intestinal infection   | Fr         | Fs          | Or             | 2  |  |
|                                          |                                  |             | Metabolic system and nutrition              | Weight loss            | Fr         | Fs          | Or             | 1  |  |
|                                          |                                  |             | Nervous system and mental health            | Mental stimulant       | Fr         | Fs          | Or             | 2  |  |
|                                          |                                  |             | Reproductive system and reproductive health | Menstruation disorders | Fr         | If          | Or             | 1  |  |
|                                          |                                  |             | Xanthorrhoeaceae                            |                        |            |             |                |    |  |
|                                          | Blood and cardio-vascular system | Hemorrhoids | Lp                                          | Fs, MI                 | Kn, Or, Pl | 4           |                |    |  |
|                                          | Digestive system                 | Diarrhoea   | Lp                                          | Fs, If, Jc, MI         | Or         | 28          |                |    |  |
| <i>Aloe vera</i> (L.) Burm. f. (FC923)   | Pencasábila, sábila, aloe        | Cultivated  | General ailments with unspecific symptoms   | Fever                  | Lp         | MI          | Kn             | 1  |  |
|                                          |                                  |             | Infections and infestations                 | Insect bite            | Lp         | MI          | Kn             | 1  |  |
|                                          |                                  |             | Other uses                                  | Hair loss              | Lp         | Fs, If, MI  | Bt, Kn, Or, Pl | 20 |  |
|                                          |                                  |             |                                             | Cancer                 | Lp         | If, MI      | Or             | 4  |  |
|                                          |                                  |             | Endocrine system                            | Diabetes               | Lp         | MI          | Or             | 1  |  |
|                                          |                                  |             | Reproductive system and reproductive health | Menstruation disorders | Lp         | MI          | Or             | 1  |  |
|                                          |                                  |             | Ritual and magic uses                       | Negative vibes         | Lp         | Fs          | Nn             | 2  |  |
|                                          |                                  |             |                                             | Bring good luck        | Lp         | Fs          | Nn             | 2  |  |



|                                                                                                                                                                                                                                                                                         |            |            |                                  |                                       |            |             |            |    |
|-----------------------------------------------------------------------------------------------------------------------------------------------------------------------------------------------------------------------------------------------------------------------------------------|------------|------------|----------------------------------|---------------------------------------|------------|-------------|------------|----|
|                                                                                                                                                                                                                                                                                         |            |            |                                  | Wounds, healing                       | Lp         | Fs          | Pl         | 1  |
|                                                                                                                                                                                                                                                                                         |            |            | Skin and subcutaneous tissue     | Acne                                  | Lp         | Fs, Ml      | Bt, Kn, Pl | 23 |
|                                                                                                                                                                                                                                                                                         |            |            |                                  | Feet fungus                           | Lp         | Fs          | Pl         | 5  |
|                                                                                                                                                                                                                                                                                         |            |            |                                  | Burns                                 | Lp         | Fs, Ml      | Kn, Pl     | 7  |
|                                                                                                                                                                                                                                                                                         |            |            | Urinary system                   | Prostate disorders                    | Lp         | Fs          | Or         | 1  |
| <b>Zingiberaceae</b>                                                                                                                                                                                                                                                                    |            |            |                                  |                                       |            |             |            |    |
| <i>Curcuma longa</i> L.                                                                                                                                                                                                                                                                 | Cúrcuma    | Cultivated | Nervous system and mental health | Insomnia                              | Fr         | Dc          | Or         | 1  |
|                                                                                                                                                                                                                                                                                         |            |            | Muscular-skeletal system         | Rheumatism                            | Ep         | If          | Or         | 1  |
| <i>Hedychium coronarium</i> J. Koenig (FC924)                                                                                                                                                                                                                                           | Azafrán    | Wild       | Skin and subcutaneous tissue     | Burns                                 | Fr, Lf, Ro | Dc, If, Mml | Bt, Kn, Pl | 8  |
|                                                                                                                                                                                                                                                                                         |            |            | Other uses                       | Cancer                                | Lf         | Dc          | Or         | 1  |
|                                                                                                                                                                                                                                                                                         |            |            | Urinary system                   | Prostate disorders                    | Fr         | Dc          | Or         | 1  |
| <i>Renealmia</i> sp. (FC925)                                                                                                                                                                                                                                                            | Caña agria | Wild       | Urinary system                   | Prostate disorders                    | Lf         | Ml          | Or         | 1  |
|                                                                                                                                                                                                                                                                                         |            |            | Other uses                       | Cancer                                | Ro         | Dc          | Or         | 1  |
|                                                                                                                                                                                                                                                                                         |            |            | Skin and subcutaneous tissue     | Feet fungus                           | Ro         | Dc, Fs      | Bt         | 2  |
|                                                                                                                                                                                                                                                                                         |            |            | Blood and cardio-vascular system | Hemorrhoids                           | Ro         | Dc          | Or         | 1  |
|                                                                                                                                                                                                                                                                                         |            |            | Digestive system                 | Diarrhoea                             | Ro         | Ml          | Or         | 3  |
|                                                                                                                                                                                                                                                                                         |            |            |                                  | Stomach cramps                        | Ro         | If          | Or         | 1  |
|                                                                                                                                                                                                                                                                                         |            |            | Metabolic system and nutrition   | Weight loss                           | Ro         | Dc, If, Ml  | Or         | 6  |
| <i>Zingiber officinale</i> Roscoe (FC926)                                                                                                                                                                                                                                               | Kión       | Cultivated | Nervous system and mental health | Insomnia                              | Ro         | If          | Or         | 1  |
|                                                                                                                                                                                                                                                                                         |            |            | Respiratory system               | Flu                                   | Ro         | Dc, Fs, If  | Or         | 8  |
|                                                                                                                                                                                                                                                                                         |            |            |                                  | Cough                                 | Ro         | Fm, If      | Or         | 2  |
|                                                                                                                                                                                                                                                                                         |            |            | Sensory system                   | Visual disorders                      | Ro         | If          | Bt         | 1  |
|                                                                                                                                                                                                                                                                                         |            |            |                                  | Prostate disorders                    | Ro         | If          | Or         | 1  |
|                                                                                                                                                                                                                                                                                         |            |            | Urinary system                   | Kidney disorders, emollient, diuretic | Ro         | Fs          | Or         | 1  |
| Plant parts                                                                                                                                                                                                                                                                             |            |            |                                  |                                       |            |             |            |    |
| <i>Ap</i> Aerial part, <i>Bd</i> Bud, <i>Bk</i> Bark, <i>Ec</i> Exocarp, <i>Ep</i> Entire plant, <i>Fl</i> Flower, <i>Fr</i> Fruit, <i>Lf</i> Leaf, <i>Lp</i> Leaf pulp, <i>Lx</i> Látex, <i>Ro</i> Root, <i>Sd</i> Seed, <i>Sp</i> Spine, <i>Ss</i> Stigmas and styles, <i>St</i> Stem |            |            |                                  |                                       |            |             |            |    |
| Preparation form                                                                                                                                                                                                                                                                        |            |            |                                  |                                       |            |             |            |    |
| <i>Dc</i> Decoction, <i>Dd</i> Dried, <i>Fm</i> Fermented, <i>Fs</i> Fresh, <i>If</i> Infusion, <i>Jc</i> Juice, <i>Ml</i> Molten, <i>Rt</i> Rotten, <i>Wm</i> Warmed                                                                                                                   |            |            |                                  |                                       |            |             |            |    |
| Mode of administration                                                                                                                                                                                                                                                                  |            |            |                                  |                                       |            |             |            |    |
| <i>Bt</i> Baths, <i>En</i> Enema, <i>Ew</i> Eyewash, <i>Gg</i> Gargle, <i>In</i> Inhaled, <i>Kn</i> Kneaded, <i>Nn</i> None, <i>Oi</i> Oil, <i>Or</i> Oral, <i>Pl</i> Plaster, <i>Vp</i> Vapours, <i>Wh</i> Whip                                                                        |            |            |                                  |                                       |            |             |            |    |
| All voucher specimens were collected by Corroto, Mostacero and Mejía                                                                                                                                                                                                                    |            |            |                                  |                                       |            |             |            |    |

**Table S2.** Medicinal plants used in the city of Chachapoyas, in the tropical montane forests of northern (Peru).

| Cultural Diseases and Disorders         | Explanation                                                                                                                                                                                                                                                                                         |
|-----------------------------------------|-----------------------------------------------------------------------------------------------------------------------------------------------------------------------------------------------------------------------------------------------------------------------------------------------------|
| Aire/Malaise                            | It is a strong headache, together with intense muscle sprains. “Malaire” (which can be literally traduced by “malevolent wind”), is said to be caused by weird air streams, warm or cold, coming down from the mountains, and affecting people by direct contact (De la Cruz <i>et al.</i> , 2007). |
| Susto/Espanto                           | It is an intense fright, affecting children and adults, caused by spirits from the wild (mountains and rivers), affecting and taking control over people (De la Cruz <i>et al.</i> , 2007).                                                                                                         |
| Antimonia/Gentil/Viejo/Antiguo o Tacsho | Bone or skin infection due to contact with bones from pre-Inca tombs called "morada de gentiles"                                                                                                                                                                                                    |

It is a gaze or evil eye of a dead person, generally in children, in such a way that the belief is that, in a family, a person when dying, out of affection, can leave a glance at the boy or girl, and in that case they have to be healed through the liberation of the spirit of the dead.

---

Tijte

Skin irritation caused by coming into contact with certain species of plants with cross-leaf growth.

---
